# Supplementary material
Source: MDPI journal article supplement (https://www.mdpi.com/2504-4990/2/4/29)
Supplement: s1 [file s1]

# Supplementary Materials: Do Randomized Algorithms Improve the Efficiency of Minimal Learning Machine?

Joakim Linja <sup>1\*</sup>, Joonas Hämäläinen <sup>1</sup>, Paavo Nieminen <sup>1</sup> and Tommi Kärkkäinen <sup>1</sup>

## 1. RMSE tables

- 2 Tables S1–S9 report the mean and standard deviation of MLM test error, measured as RMSE value.
- 3 The data table with  $K = 70$  for RMSE is shown in the main text and is not repeated here due to that.

**Table S1.** RMSE for  $K = 10$ . Bolded numbers differ statistically from *Lstsq*.

| Dataset        | BC                 |                    | BH                 |                    | AC                 |                    | CA                 |                    | CE                 |                    |
|----------------|--------------------|--------------------|--------------------|--------------------|--------------------|--------------------|--------------------|--------------------|--------------------|--------------------|
|                | $\bar{x}$          | $\sigma$           |
| Method / coef. | $1 \times 10^{-1}$ | $1 \times 10^{-2}$ | $1 \times 10^{-2}$ | $1 \times 10^{-2}$ | $1 \times 10^{-2}$ | $1 \times 10^{-3}$ | $1 \times 10^{-2}$ | $1 \times 10^{-4}$ | $1 \times 10^{-2}$ | $1 \times 10^{-3}$ |
| Lstsq          | 2.59               | 2.16               | 9.55               | 1.46               | 3.06               | 1.94               | 2.58               | 7.53               | 6.17               | 2.24               |
| Lstsq (nr)     | 2.59               | 2.16               | 9.55               | 1.46               | 3.06               | 1.94               | 2.58               | 7.53               | -                  | -                  |
| np.inv         | 2.59               | 2.16               | 9.55               | 1.46               | 3.06               | 1.94               | 2.58               | 7.53               | 6.17               | 2.24               |
| np.inv (nr)    | 2.59               | 2.16               | 9.55               | 1.46               | 3.06               | 1.94               | 2.58               | 7.53               | -                  | -                  |
| np.solve       | 2.59               | 2.16               | 9.55               | 1.46               | 3.06               | 1.94               | 2.58               | 7.53               | 6.17               | 2.24               |
| np.solve (nr)  | 2.59               | 2.16               | 9.55               | 1.46               | 3.06               | 1.94               | 2.58               | 7.53               | -                  | -                  |
| np.svd         | 2.59               | 2.16               | 9.55               | 1.46               | 3.06               | 1.94               | 2.58               | 7.53               | 6.17               | 2.24               |
| sp.svd         | 2.59               | 2.16               | 9.55               | 1.46               | 3.06               | 1.94               | 2.58               | 7.53               | -                  | -                  |
| Cho.Dec        | 2.59               | 2.16               | 9.55               | 1.46               | 3.06               | 1.94               | 2.58               | 7.53               | 6.17               | 2.24               |
| rKrSVD02       | 2.59               | 2.16               | 9.55               | 1.46               | 3.06               | 1.94               | 2.58               | 7.53               | 6.17               | 2.24               |
| rKrSVD04       | 2.59               | 2.16               | 9.55               | 1.46               | 3.06               | 1.94               | 2.58               | 7.53               | 6.17               | 2.24               |
| rKrSVD06       | 2.59               | 2.16               | 9.55               | 1.46               | 3.06               | 1.94               | 2.58               | 7.53               | 6.17               | 2.24               |
| rKrSVD08       | 2.59               | 2.16               | 9.55               | 1.46               | 3.06               | 1.94               | 2.58               | 7.53               | -                  | -                  |
| rKrSVD10       | 2.59               | 2.16               | 9.55               | 1.46               | 3.06               | 1.94               | 2.58               | 7.53               | -                  | -                  |
| skrSVD02       | 2.59               | 2.16               | 9.55               | 1.46               | 3.06               | 1.94               | 2.58               | 7.53               | 6.17               | 2.24               |
| skrSVD04       | 2.59               | 2.16               | 9.55               | 1.46               | 3.06               | 1.94               | 2.58               | 7.53               | 6.17               | 2.24               |
| skrSVD06       | 2.59               | 2.16               | 9.55               | 1.46               | 3.06               | 1.94               | 2.58               | 7.53               | 6.17               | 2.24               |
| skrSVD08       | 2.59               | 2.16               | 9.55               | 1.46               | 3.06               | 1.94               | 2.58               | 7.53               | -                  | -                  |
| skrSVD10       | 2.59               | 2.16               | 9.55               | 1.46               | 3.06               | 1.94               | 2.58               | 7.53               | -                  | -                  |
| SVDU           | 2.62               | 2.16               | 9.58               | 1.63               | <b>3.56</b>        | 3.14               | -                  | -                  | -                  | -                  |

**Table S2.** RMSE for  $K = 20$ . Bolded numbers differ statistically from *Lstsq*.

| Dataset        | BC                 |                    | BH                 |                    | AC                 |                    | CA                 |                    | CE                 |                    |
|----------------|--------------------|--------------------|--------------------|--------------------|--------------------|--------------------|--------------------|--------------------|--------------------|--------------------|
|                | $\bar{x}$          | $\sigma$           |
| Method / coef. | $1 \times 10^{-1}$ | $1 \times 10^{-2}$ | $1 \times 10^{-2}$ | $1 \times 10^{-2}$ | $1 \times 10^{-2}$ | $1 \times 10^{-3}$ | $1 \times 10^{-2}$ | $1 \times 10^{-4}$ | $1 \times 10^{-2}$ | $1 \times 10^{-3}$ |
| Lstsq          | 2.63               | 2.28               | 7.87               | 1.48               | 2.54               | 1.5                | 2.49               | 7.99               | 6.19               | 2.22               |
| Lstsq (nr)     | 2.63               | 2.28               | 7.87               | 1.48               | 2.54               | 1.5                | 2.49               | 7.99               | -                  | -                  |
| np.inv         | 2.63               | 2.28               | 7.87               | 1.48               | 2.54               | 1.5                | 2.49               | 7.99               | 6.19               | 2.22               |
| np.inv (nr)    | 2.63               | 2.28               | 7.87               | 1.48               | 2.54               | 1.5                | 2.49               | 7.99               | -                  | -                  |
| np.solve       | 2.63               | 2.28               | 7.87               | 1.48               | 2.54               | 1.5                | 2.49               | 7.99               | 6.19               | 2.22               |
| np.solve (nr)  | 2.63               | 2.28               | 7.87               | 1.48               | 2.54               | 1.5                | 2.49               | 7.99               | -                  | -                  |
| np.svd         | 2.63               | 2.28               | 7.87               | 1.48               | 2.54               | 1.5                | 2.49               | 7.99               | 6.19               | 2.22               |
| sp.svd         | 2.63               | 2.28               | 7.87               | 1.48               | 2.54               | 1.5                | 2.49               | 7.99               | -                  | -                  |
| Cho.Dec        | 2.63               | 2.28               | 7.87               | 1.48               | 2.54               | 1.5                | 2.49               | 7.99               | 6.19               | 2.22               |
| rKrSVD02       | 2.63               | 2.28               | 7.88               | 1.48               | 2.54               | 1.5                | 2.49               | 7.99               | 6.19               | 2.22               |
| rKrSVD04       | 2.63               | 2.28               | 7.87               | 1.48               | 2.54               | 1.5                | 2.49               | 7.99               | 6.19               | 2.22               |
| rKrSVD06       | 2.63               | 2.28               | 7.87               | 1.48               | 2.54               | 1.5                | 2.49               | 7.99               | 6.19               | 2.22               |
| rKrSVD08       | 2.63               | 2.28               | 7.87               | 1.48               | 2.54               | 1.5                | 2.49               | 7.99               | -                  | -                  |
| rKrSVD10       | 2.63               | 2.28               | 7.87               | 1.48               | 2.54               | 1.5                | 2.49               | 7.99               | -                  | -                  |
| skrSVD02       | 2.63               | 2.28               | 7.88               | 1.48               | 2.54               | 1.5                | 2.49               | 7.99               | 6.19               | 2.22               |
| skrSVD04       | 2.63               | 2.28               | 7.87               | 1.48               | 2.54               | 1.5                | 2.49               | 7.99               | 6.19               | 2.22               |
| skrSVD06       | 2.63               | 2.28               | 7.87               | 1.48               | 2.54               | 1.5                | 2.49               | 7.99               | 6.19               | 2.22               |
| skrSVD08       | 2.63               | 2.28               | 7.87               | 1.48               | 2.54               | 1.5                | 2.49               | 7.99               | -                  | -                  |
| skrSVD10       | 2.63               | 2.28               | 7.87               | 1.48               | 2.54               | 1.5                | 2.49               | 7.99               | -                  | -                  |
| SVDU           | 2.64               | 2.33               | <b>8.64</b>        | 1.56               | <b>2.98</b>        | 2.43               | -                  | -                  | -                  | -                  |

**Table S3.** RMSE for  $K = 30$ . Bolded numbers differ statistically from *Lstsq*.

| Dataset        | BC                 |                    | BH                 |                    | AC                 |                    | CA                 |                    | CE                 |                    |
|----------------|--------------------|--------------------|--------------------|--------------------|--------------------|--------------------|--------------------|--------------------|--------------------|--------------------|
|                | $\bar{x}$          | $\sigma$           |
| Method / coef. | $1 \times 10^{-1}$ | $1 \times 10^{-2}$ | $1 \times 10^{-2}$ | $1 \times 10^{-2}$ | $1 \times 10^{-2}$ | $1 \times 10^{-3}$ | $1 \times 10^{-2}$ | $1 \times 10^{-4}$ | $1 \times 10^{-2}$ | $1 \times 10^{-3}$ |
| Lstsq          | 2.67               | 2.19               | 7.39               | 1.46               | 2.39               | 1.47               | 2.45               | 8.14               | 6.2                | 2.21               |
| Lstsq (nr)     | 2.67               | 2.19               | 7.39               | 1.46               | 2.39               | 1.47               | 2.45               | 8.14               | -                  | -                  |
| np.inv         | 2.67               | 2.19               | 7.39               | 1.46               | 2.39               | 1.47               | 2.45               | 8.14               | 6.2                | 2.21               |
| np.inv (nr)    | 2.67               | 2.19               | 7.39               | 1.46               | 2.39               | 1.47               | 2.45               | 8.14               | -                  | -                  |
| np.solve       | 2.67               | 2.19               | 7.39               | 1.46               | 2.39               | 1.47               | 2.45               | 8.14               | 6.2                | 2.21               |
| np.solve (nr)  | 2.67               | 2.19               | 7.39               | 1.46               | 2.39               | 1.47               | 2.45               | 8.14               | -                  | -                  |
| np.svd         | 2.67               | 2.19               | 7.39               | 1.46               | 2.39               | 1.47               | 2.45               | 8.14               | 6.2                | 2.21               |
| sp.svd         | 2.67               | 2.19               | 7.39               | 1.46               | 2.39               | 1.47               | 2.45               | 8.14               | -                  | -                  |
| Cho.Dec        | 2.67               | 2.19               | 7.39               | 1.46               | 2.39               | 1.47               | 2.45               | 8.14               | 6.2                | 2.21               |
| rKrSVD02       | 2.64               | 2.17               | <b>7.83</b>        | 1.45               | <b>2.54</b>        | 1.52               | 2.47               | 8.09               | 6.18               | 2.18               |
| rKrSVD04       | 2.67               | 2.19               | 7.39               | 1.46               | 2.39               | 1.47               | 2.45               | 8.14               | 6.2                | 2.21               |
| rKrSVD06       | 2.67               | 2.19               | 7.39               | 1.46               | 2.39               | 1.47               | 2.45               | 8.14               | 6.2                | 2.21               |
| rKrSVD08       | 2.67               | 2.19               | 7.39               | 1.46               | 2.39               | 1.47               | 2.45               | 8.14               | -                  | -                  |
| rKrSVD10       | 2.67               | 2.19               | 7.39               | 1.46               | 2.39               | 1.47               | 2.45               | 8.14               | -                  | -                  |
| skrSVD02       | 2.64               | 2.22               | 7.68               | 1.46               | <b>2.49</b>        | 1.55               | 2.46               | 8.08               | 6.18               | 2.22               |
| skrSVD04       | 2.67               | 2.19               | 7.39               | 1.46               | 2.39               | 1.47               | 2.45               | 8.14               | 6.2                | 2.21               |
| skrSVD06       | 2.67               | 2.19               | 7.39               | 1.46               | 2.39               | 1.47               | 2.45               | 8.14               | 6.2                | 2.21               |
| skrSVD08       | 2.67               | 2.19               | 7.39               | 1.46               | 2.39               | 1.47               | 2.45               | 8.14               | -                  | -                  |
| skrSVD10       | 2.67               | 2.19               | 7.39               | 1.46               | 2.39               | 1.47               | 2.45               | 8.14               | -                  | -                  |
| SVDU           | 2.66               | 2.39               | <b>8.11</b>        | 1.56               | <b>2.69</b>        | 2.23               | -                  | -                  | -                  | -                  |

**Table S4.** RMSE for  $K = 40$ . Bolded numbers differ statistically from *Lstsq*.

| Dataset        | BC                 |                    | BH                 |                    | AC                 |                    | CA                 |                    | CE                 |                    |
|----------------|--------------------|--------------------|--------------------|--------------------|--------------------|--------------------|--------------------|--------------------|--------------------|--------------------|
|                | $\bar{x}$          | $\sigma$           |
| Method / coef. | $1 \times 10^{-1}$ | $1 \times 10^{-2}$ | $1 \times 10^{-2}$ | $1 \times 10^{-2}$ | $1 \times 10^{-2}$ | $1 \times 10^{-3}$ | $1 \times 10^{-2}$ | $1 \times 10^{-4}$ | $1 \times 10^{-2}$ | $1 \times 10^{-3}$ |
| Lstsq          | 2.7                | 2.24               | 7.04               | 1.33               | 2.31               | 1.46               | 2.45               | 8.33               | 6.24               | 2.2                |
| Lstsq (nr)     | 2.7                | 2.24               | 7.04               | 1.33               | 2.31               | 1.46               | 2.45               | 8.33               | -                  | -                  |
| np.inv         | 2.7                | 2.24               | 7.04               | 1.33               | 2.31               | 1.46               | 2.45               | 8.33               | 6.24               | 2.2                |
| np.inv (nr)    | 2.7                | 2.24               | 7.04               | 1.33               | 2.31               | 1.46               | 2.45               | 8.33               | -                  | -                  |
| np.solve       | 2.7                | 2.24               | 7.04               | 1.33               | 2.31               | 1.46               | 2.45               | 8.33               | 6.24               | 2.2                |
| np.solve (nr)  | 2.7                | 2.24               | 7.04               | 1.33               | 2.31               | 1.46               | 2.45               | 8.33               | -                  | -                  |
| np.svd         | 2.7                | 2.24               | 7.04               | 1.33               | 2.31               | 1.46               | 2.45               | 8.33               | 6.24               | 2.2                |
| sp.svd         | 2.7                | 2.24               | 7.04               | 1.33               | 2.31               | 1.46               | 2.45               | 8.33               | -                  | -                  |
| Cho.Dec        | 2.7                | 2.24               | 7.04               | 1.33               | 2.31               | 1.46               | 2.45               | 8.33               | 6.24               | 2.2                |
| rKrSVD02       | 2.65               | 2.29               | <b>7.81</b>        | 1.35               | <b>2.56</b>        | 1.47               | <b>2.47</b>        | 8.2                | 6.19               | 2.22               |
| rKrSVD04       | 2.7                | 2.24               | 7.04               | 1.33               | 2.31               | 1.46               | 2.45               | 8.33               | 6.24               | 2.2                |
| rKrSVD06       | 2.7                | 2.24               | 7.04               | 1.33               | 2.31               | 1.46               | 2.45               | 8.33               | 6.24               | 2.2                |
| rKrSVD08       | 2.7                | 2.24               | 7.04               | 1.33               | 2.31               | 1.46               | 2.45               | 8.33               | -                  | -                  |
| rKrSVD10       | 2.7                | 2.24               | 7.04               | 1.33               | 2.31               | 1.46               | 2.45               | 8.33               | -                  | -                  |
| skrSVD02       | 2.65               | 2.27               | <b>7.65</b>        | 1.41               | <b>2.49</b>        | 1.53               | 2.46               | 8.13               | 6.18               | 2.2                |
| skrSVD04       | 2.7                | 2.24               | 7.04               | 1.33               | 2.31               | 1.46               | 2.45               | 8.33               | 6.24               | 2.19               |
| skrSVD06       | 2.7                | 2.24               | 7.04               | 1.33               | 2.31               | 1.46               | 2.45               | 8.33               | 6.24               | 2.2                |
| skrSVD08       | 2.7                | 2.24               | 7.04               | 1.33               | 2.31               | 1.46               | 2.45               | 8.33               | -                  | -                  |
| skrSVD10       | 2.7                | 2.24               | 7.04               | 1.33               | 2.31               | 1.46               | 2.45               | 8.33               | -                  | -                  |
| SVDU           | 2.69               | 2.42               | <b>7.76</b>        | 1.54               | <b>2.53</b>        | 1.96               | -                  | -                  | -                  | -                  |

**Table S5.** RMSE for  $K = 50$ . Bolded numbers differ statistically from *Lstsq*.

| Dataset        | BC                 |                    | BH                 |                    | AC                 |                    | CA                 |                    | CE                 |                    |
|----------------|--------------------|--------------------|--------------------|--------------------|--------------------|--------------------|--------------------|--------------------|--------------------|--------------------|
|                | $\bar{x}$          | $\sigma$           |
| Method / coef. | $1 \times 10^{-1}$ | $1 \times 10^{-2}$ | $1 \times 10^{-2}$ | $1 \times 10^{-2}$ | $1 \times 10^{-2}$ | $1 \times 10^{-3}$ | $1 \times 10^{-2}$ | $1 \times 10^{-4}$ | $1 \times 10^{-2}$ | $1 \times 10^{-3}$ |
| Lstsq          | 2.75               | 2.29               | 6.95               | 1.35               | 2.26               | 1.45               | 2.44               | 8.34               | 6.26               | 2.2                |
| Lstsq (nr)     | 2.75               | 2.29               | 6.95               | 1.35               | 2.26               | 1.45               | 2.44               | 8.34               | -                  | -                  |
| np.inv         | 2.75               | 2.29               | 6.95               | 1.35               | 2.26               | 1.45               | 2.44               | 8.34               | 6.26               | 2.2                |
| np.inv (nr)    | 2.75               | 2.29               | 6.95               | 1.35               | 2.26               | 1.45               | 2.44               | 8.34               | -                  | -                  |
| np.solve       | 2.75               | 2.29               | 6.95               | 1.35               | 2.26               | 1.45               | 2.44               | 8.34               | 6.26               | 2.2                |
| np.solve (nr)  | 2.75               | 2.29               | 6.95               | 1.35               | 2.26               | 1.45               | 2.44               | 8.34               | -                  | -                  |
| np.svd         | 2.75               | 2.29               | 6.95               | 1.35               | 2.26               | 1.45               | 2.44               | 8.34               | 6.26               | 2.2                |
| sp.svd         | 2.75               | 2.29               | 6.95               | 1.35               | 2.26               | 1.45               | 2.44               | 8.34               | -                  | -                  |
| Cho.Dec        | 2.75               | 2.29               | 6.95               | 1.35               | 2.26               | 1.45               | 2.44               | 8.34               | 6.26               | 2.2                |
| rKrSVD02       | <b>2.68</b>        | 2.23               | <b>7.86</b>        | 1.4                | <b>2.55</b>        | 1.54               | <b>2.47</b>        | 8.13               | 6.2                | 2.19               |
| rKrSVD04       | 2.72               | 2.25               | 7.06               | 1.35               | <b>2.31</b>        | 1.45               | 2.45               | 8.24               | 6.24               | 2.2                |
| rKrSVD06       | 2.75               | 2.29               | 6.95               | 1.35               | 2.26               | 1.45               | 2.44               | 8.34               | 6.26               | 2.2                |
| rKrSVD08       | 2.75               | 2.29               | 6.95               | 1.35               | 2.26               | 1.45               | 2.44               | 8.34               | -                  | -                  |
| rKrSVD10       | 2.75               | 2.29               | 6.95               | 1.35               | 2.26               | 1.45               | 2.44               | 8.34               | -                  | -                  |
| skrSVD02       | <b>2.66</b>        | 2.25               | <b>7.73</b>        | 1.47               | <b>2.48</b>        | 1.54               | 2.46               | 8.21               | 6.18               | 2.23               |
| skrSVD04       | 2.72               | 2.25               | 6.98               | 1.36               | 2.29               | 1.46               | 2.44               | 8.3                | 6.24               | 2.18               |
| skrSVD06       | 2.75               | 2.29               | 6.95               | 1.35               | 2.26               | 1.45               | 2.44               | 8.34               | 6.26               | 2.2                |
| skrSVD08       | 2.75               | 2.29               | 6.95               | 1.35               | 2.26               | 1.45               | 2.44               | 8.34               | -                  | -                  |
| skrSVD10       | 2.75               | 2.29               | 6.95               | 1.35               | 2.26               | 1.45               | 2.44               | 8.34               | -                  | -                  |
| SVDU           | 2.71               | 2.45               | <b>7.48</b>        | 1.51               | <b>2.42</b>        | 1.82               | -                  | -                  | -                  | -                  |

**Table S6.** RMSE for  $K = 60$ . Bolded numbers differ statistically from *Lstsq*.

| Dataset        | BC                 |                    | BH                 |                    | AC                 |                    | CA                 |                    | CE                 |                    |
|----------------|--------------------|--------------------|--------------------|--------------------|--------------------|--------------------|--------------------|--------------------|--------------------|--------------------|
|                | $\bar{x}$          | $\sigma$           |
| Method / coef. | $1 \times 10^{-1}$ | $1 \times 10^{-2}$ | $1 \times 10^{-2}$ | $1 \times 10^{-2}$ | $1 \times 10^{-2}$ | $1 \times 10^{-3}$ | $1 \times 10^{-2}$ | $1 \times 10^{-4}$ | $1 \times 10^{-2}$ | $1 \times 10^{-3}$ |
| Lstsq          | 2.76               | 2.26               | 6.83               | 1.36               | 2.23               | 1.45               | 2.44               | 8.41               | 6.27               | 2.19               |
| Lstsq (nr)     | 2.76               | 2.26               | 6.83               | 1.36               | 2.23               | 1.45               | 2.44               | 8.41               | -                  | -                  |
| np.inv         | 2.76               | 2.26               | 6.83               | 1.36               | 2.23               | 1.45               | 2.44               | 8.41               | 6.27               | 2.19               |
| np.inv (nr)    | 2.76               | 2.26               | 6.83               | 1.36               | 2.23               | 1.45               | 2.44               | 8.41               | -                  | -                  |
| np.solve       | 2.76               | 2.26               | 6.83               | 1.36               | 2.23               | 1.45               | 2.44               | 8.41               | 6.27               | 2.19               |
| np.solve (nr)  | 2.76               | 2.26               | 6.83               | 1.36               | 2.23               | 1.45               | 2.44               | 8.41               | -                  | -                  |
| np.svd         | 2.76               | 2.26               | 6.83               | 1.36               | 2.23               | 1.45               | 2.44               | 8.41               | 6.27               | 2.19               |
| sp.svd         | 2.76               | 2.26               | 6.83               | 1.36               | 2.23               | 1.45               | 2.44               | 8.41               | -                  | -                  |
| Cho.Dec        | 2.76               | 2.26               | 6.83               | 1.36               | 2.23               | 1.45               | 2.44               | 8.41               | 6.27               | 2.19               |
| rKrSVD02       | <b>2.67</b>        | 2.22               | <b>7.96</b>        | 1.45               | <b>2.56</b>        | 1.57               | <b>2.47</b>        | 8.64               | 6.21               | 2.24               |
| rKrSVD04       | 2.72               | 2.3                | 7.1                | 1.37               | <b>2.3</b>         | 1.44               | 2.45               | 8.2                | 6.24               | 2.22               |
| rKrSVD06       | 2.76               | 2.26               | 6.83               | 1.36               | 2.23               | 1.45               | 2.44               | 8.41               | 6.27               | 2.19               |
| rKrSVD08       | 2.76               | 2.26               | 6.83               | 1.36               | 2.23               | 1.45               | 2.44               | 8.41               | -                  | -                  |
| rKrSVD10       | 2.76               | 2.26               | 6.83               | 1.36               | 2.23               | 1.45               | 2.44               | 8.41               | -                  | -                  |
| skrSVD02       | <b>2.66</b>        | 2.28               | <b>7.77</b>        | 1.46               | <b>2.49</b>        | 1.63               | 2.46               | 8.3                | <b>6.18</b>        | 2.21               |
| skrSVD04       | 2.72               | 2.28               | 6.97               | 1.37               | <b>2.28</b>        | 1.43               | 2.44               | 8.26               | 6.24               | 2.2                |
| skrSVD06       | 2.76               | 2.26               | 6.83               | 1.36               | 2.23               | 1.45               | 2.44               | 8.41               | 6.29               | 2.22               |
| skrSVD08       | 2.76               | 2.26               | 6.83               | 1.36               | 2.23               | 1.45               | 2.44               | 8.41               | -                  | -                  |
| skrSVD10       | 2.76               | 2.26               | 6.83               | 1.36               | 2.23               | 1.45               | 2.44               | 8.41               | -                  | -                  |
| SVDU           | 2.71               | 2.41               | <b>7.28</b>        | 1.54               | <b>2.34</b>        | 1.75               | -                  | -                  | -                  | -                  |

**Table S7.** RMSE for  $K = 80$ . Bolded numbers differ statistically from *Lstsq*.

| Dataset        | BC                 |                    | BH                 |                    | AC                 |                    | CA                 |                    | CE        |          |
|----------------|--------------------|--------------------|--------------------|--------------------|--------------------|--------------------|--------------------|--------------------|-----------|----------|
|                | $\bar{x}$          | $\sigma$           | $\bar{x}$          | $\sigma$           | $\bar{x}$          | $\sigma$           | $\bar{x}$          | $\sigma$           | $\bar{x}$ | $\sigma$ |
| Method / coef. | $1 \times 10^{-1}$ | $1 \times 10^{-2}$ | $1 \times 10^{-2}$ | $1 \times 10^{-2}$ | $1 \times 10^{-2}$ | $1 \times 10^{-3}$ | $1 \times 10^{-2}$ | $1 \times 10^{-4}$ | -         | -        |
| Lstsq          | 2.77               | 2.39               | 6.78               | 1.35               | 2.18               | 1.48               | 2.43               | 8.4                | -         | -        |
| Lstsq (nr)     | 2.77               | 2.39               | 6.78               | 1.35               | 2.18               | 1.48               | 2.43               | 8.4                | -         | -        |
| np.inv         | 2.77               | 2.39               | 6.78               | 1.35               | 2.18               | 1.48               | 2.43               | 8.4                | -         | -        |
| np.inv (nr)    | 2.77               | 2.39               | 6.78               | 1.35               | 2.18               | 1.48               | 2.43               | 8.4                | -         | -        |
| np.solve       | 2.77               | 2.39               | 6.78               | 1.35               | 2.18               | 1.48               | 2.43               | 8.4                | -         | -        |
| np.solve (nr)  | 2.77               | 2.39               | 6.78               | 1.35               | 2.18               | 1.48               | 2.43               | 8.4                | -         | -        |
| np.svd         | 2.77               | 2.39               | 6.78               | 1.35               | 2.18               | 1.48               | 2.43               | 8.4                | -         | -        |
| sp.svd         | 2.77               | 2.39               | 6.78               | 1.35               | 2.18               | 1.48               | 2.43               | 8.4                | -         | -        |
| Cho.Dec        | 2.77               | 2.39               | 6.78               | 1.35               | 2.18               | 1.48               | 2.43               | 8.4                | -         | -        |
| rKrSVD02       | <b>2.68</b>        | 2.41               | <b>8.01</b>        | 1.39               | <b>2.58</b>        | 1.53               | <b>2.48</b>        | 8.32               | -         | -        |
| rKrSVD04       | 2.74               | 2.3                | 7.13               | 1.36               | <b>2.32</b>        | 1.43               | 2.45               | 8.33               | -         | -        |
| rKrSVD06       | 2.73               | 2.37               | 6.88               | 1.36               | <b>2.22</b>        | 1.45               | 2.44               | 8.47               | -         | -        |
| rKrSVD08       | 2.77               | 2.39               | 6.78               | 1.35               | 2.18               | 1.48               | 2.43               | 8.4                | -         | -        |
| rKrSVD10       | 2.77               | 2.39               | 6.78               | 1.35               | 2.18               | 1.48               | 2.43               | 8.4                | -         | -        |
| skrSVD02       | <b>2.66</b>        | 2.32               | <b>7.84</b>        | 1.46               | <b>2.51</b>        | 1.65               | <b>2.45</b>        | 8.43               | -         | -        |
| skrSVD04       | 2.71               | 2.34               | 6.99               | 1.37               | <b>2.28</b>        | 1.42               | 2.44               | 8.34               | -         | -        |
| skrSVD06       | 2.74               | 2.36               | 6.84               | 1.36               | 2.21               | 1.46               | 2.43               | 8.44               | -         | -        |
| skrSVD08       | 2.77               | 2.39               | 6.78               | 1.35               | 2.18               | 1.48               | 2.43               | 8.4                | -         | -        |
| skrSVD10       | 2.77               | 2.39               | 6.78               | 1.35               | 2.18               | 1.48               | 2.43               | 8.4                | -         | -        |
| SVDU           | 2.75               | 2.41               | 6.94               | 1.41               | <b>2.22</b>        | 1.55               | -                  | -                  | -         | -        |

**Table S8.** RMSE for  $K = 90$ . Bolded numbers differ statistically from *Lstsq*.

| Dataset        | BC                 |                    | BH                 |                    | AC                 |                    | CA                 |                    | CE        |          |
|----------------|--------------------|--------------------|--------------------|--------------------|--------------------|--------------------|--------------------|--------------------|-----------|----------|
|                | $\bar{x}$          | $\sigma$           | $\bar{x}$          | $\sigma$           | $\bar{x}$          | $\sigma$           | $\bar{x}$          | $\sigma$           | $\bar{x}$ | $\sigma$ |
| Method / coef. | $1 \times 10^{-1}$ | $1 \times 10^{-2}$ | $1 \times 10^{-2}$ | $1 \times 10^{-2}$ | $1 \times 10^{-2}$ | $1 \times 10^{-3}$ | $1 \times 10^{-2}$ | $1 \times 10^{-4}$ | -         | -        |
| Lstsq          | 2.77               | 2.45               | 6.72               | 1.36               | 2.16               | 1.49               | 2.42               | 8.48               | -         | -        |
| Lstsq (nr)     | 2.77               | 2.45               | 6.72               | 1.36               | 2.16               | 1.49               | 2.42               | 8.48               | -         | -        |
| np.inv         | 2.77               | 2.45               | 6.72               | 1.36               | 2.16               | 1.49               | 2.42               | 8.48               | -         | -        |
| np.inv (nr)    | 2.77               | 2.45               | 6.72               | 1.36               | 2.16               | 1.49               | 2.42               | 8.48               | -         | -        |
| np.solve       | 2.77               | 2.45               | 6.72               | 1.36               | 2.16               | 1.49               | 2.42               | 8.48               | -         | -        |
| np.solve (nr)  | 2.77               | 2.45               | 6.72               | 1.36               | 2.16               | 1.49               | 2.42               | 8.48               | -         | -        |
| np.svd         | 2.77               | 2.45               | 6.72               | 1.36               | 2.16               | 1.49               | 2.42               | 8.48               | -         | -        |
| sp.svd         | 2.77               | 2.45               | 6.72               | 1.36               | 2.16               | 1.49               | 2.42               | 8.48               | -         | -        |
| Cho.Dec        | 2.77               | 2.45               | 6.72               | 1.36               | 2.16               | 1.49               | 2.42               | 8.48               | -         | -        |
| rKrSVD02       | <b>2.7</b>         | 2.39               | <b>7.97</b>        | 1.44               | <b>2.6</b>         | 1.53               | <b>2.47</b>        | 8.5                | -         | -        |
| rKrSVD04       | 2.73               | 2.4                | <b>7.1</b>         | 1.35               | <b>2.32</b>        | 1.45               | <b>2.45</b>        | 8.39               | -         | -        |
| rKrSVD06       | 2.73               | 2.35               | 6.85               | 1.36               | <b>2.23</b>        | 1.49               | 2.44               | 8.55               | -         | -        |
| rKrSVD08       | 2.76               | 2.44               | 6.75               | 1.35               | 2.18               | 1.47               | 2.43               | 8.45               | -         | -        |
| rKrSVD10       | 2.77               | 2.45               | 6.72               | 1.36               | 2.16               | 1.49               | 2.42               | 8.48               | -         | -        |
| skrSVD02       | <b>2.67</b>        | 2.32               | <b>7.83</b>        | 1.47               | <b>2.52</b>        | 1.59               | <b>2.45</b>        | 8.37               | -         | -        |
| skrSVD04       | 2.71               | 2.26               | 6.96               | 1.38               | <b>2.28</b>        | 1.44               | 2.43               | 8.38               | -         | -        |
| skrSVD06       | 2.73               | 2.37               | 6.81               | 1.37               | <b>2.21</b>        | 1.46               | 2.43               | 8.47               | -         | -        |
| skrSVD08       | 2.76               | 2.46               | 6.74               | 1.35               | 2.17               | 1.48               | 2.43               | 8.44               | -         | -        |
| skrSVD10       | 2.77               | 2.45               | 6.72               | 1.36               | 2.16               | 1.49               | 2.42               | 8.48               | -         | -        |
| SVDU           | 2.77               | 2.38               | 6.79               | 1.36               | 2.19               | 1.49               | -                  | -                  | -         | -        |

**Table S9.** RMSE for  $K = 100$ . Bolded numbers differ statistically from *Lstsq*.

| Dataset        | BC                 |                    | BH                 |                    | AC                 |                    | CA                 |                    | CE        |          |
|----------------|--------------------|--------------------|--------------------|--------------------|--------------------|--------------------|--------------------|--------------------|-----------|----------|
|                | $\bar{x}$          | $\sigma$           | $\bar{x}$          | $\sigma$           | $\bar{x}$          | $\sigma$           | $\bar{x}$          | $\sigma$           | $\bar{x}$ | $\sigma$ |
| Method / coef. | $1 \times 10^{-1}$ | $1 \times 10^{-2}$ | $1 \times 10^{-2}$ | $1 \times 10^{-2}$ | $1 \times 10^{-2}$ | $1 \times 10^{-3}$ | $1 \times 10^{-2}$ | $1 \times 10^{-4}$ | -         | -        |
| Lstsq          | 2.78               | 2.43               | 6.71               | 1.36               | 2.15               | 1.5                | 2.42               | 8.48               | -         | -        |
| Lstsq (nr)     | 2.78               | 2.43               | 6.71               | 1.36               | 2.15               | 1.5                | 2.42               | 8.48               | -         | -        |
| np.inv         | 2.78               | 2.43               | 6.71               | 1.36               | 2.15               | 1.5                | 2.42               | 8.48               | -         | -        |
| np.inv (nr)    | 2.78               | 2.43               | 6.71               | 1.36               | 2.15               | 1.5                | 2.42               | 8.48               | -         | -        |
| np.solve       | 2.78               | 2.43               | 6.71               | 1.36               | 2.15               | 1.5                | 2.42               | 8.48               | -         | -        |
| np.solve (nr)  | 2.78               | 2.43               | 6.71               | 1.36               | 2.15               | 1.5                | 2.42               | 8.48               | -         | -        |
| np.svd         | 2.78               | 2.43               | 6.71               | 1.36               | 2.15               | 1.5                | 2.42               | 8.48               | -         | -        |
| sp.svd         | 2.78               | 2.43               | 6.71               | 1.36               | 2.15               | 1.5                | 2.42               | 8.48               | -         | -        |
| Cho.Dec        | 2.78               | 2.43               | 6.71               | 1.36               | 2.15               | 1.5                | 2.42               | 8.48               | -         | -        |
| rKrSVD02       | <b>2.69</b>        | 2.35               | <b>8.03</b>        | 1.4                | <b>2.61</b>        | 1.66               | <b>2.47</b>        | 8.51               | -         | -        |
| rKrSVD04       | 2.73               | 2.36               | <b>7.13</b>        | 1.33               | <b>2.32</b>        | 1.45               | 2.44               | 8.58               | -         | -        |
| rKrSVD06       | 2.75               | 2.41               | 6.87               | 1.35               | <b>2.23</b>        | 1.45               | 2.43               | 8.62               | -         | -        |
| rKrSVD08       | 2.76               | 2.32               | 6.79               | 1.35               | 2.18               | 1.52               | 2.43               | 8.46               | -         | -        |
| rKrSVD10       | 2.78               | 2.43               | 6.71               | 1.36               | 2.15               | 1.5                | 2.42               | 8.48               | -         | -        |
| skrSVD02       | <b>2.66</b>        | 2.31               | <b>7.84</b>        | 1.43               | <b>2.54</b>        | 1.63               | <b>2.45</b>        | 8.38               | -         | -        |
| skrSVD04       | <b>2.69</b>        | 2.39               | 6.99               | 1.37               | <b>2.28</b>        | 1.45               | 2.43               | 8.46               | -         | -        |
| skrSVD06       | 2.73               | 2.34               | 6.82               | 1.37               | <b>2.21</b>        | 1.44               | 2.43               | 8.52               | -         | -        |
| skrSVD08       | 2.77               | 2.35               | 6.76               | 1.35               | 2.17               | 1.51               | 2.42               | 8.5                | -         | -        |
| skrSVD10       | 2.78               | 2.43               | 6.71               | 1.36               | 2.15               | 1.5                | 2.42               | 8.48               | -         | -        |
| SVDU           | 2.78               | 2.43               | 6.71               | 1.36               | 2.15               | 1.5                | -                  | -                  | -         | -        |

## 2. Process time tables

- Tables S10–S19 report the mean and standard deviation of process time taken in OLS evaluation.

**Table S10.** Process time (s) for  $K = 10$ . Bolded numbers differ statistically from *Lstsq*.

| Dataset        | BC                 |                    | BH                 |                    | AC                 |                    | CA              |                    | CE              |                 |
|----------------|--------------------|--------------------|--------------------|--------------------|--------------------|--------------------|-----------------|--------------------|-----------------|-----------------|
|                | $\bar{x}$          | $\sigma$           | $\bar{x}$          | $\sigma$           | $\bar{x}$          | $\sigma$           | $\bar{x}$       | $\sigma$           | $\bar{x}$       | $\sigma$        |
| Method / coef. | $1 \times 10^{-2}$ | $1 \times 10^{-4}$ | $1 \times 10^{-2}$ | $1 \times 10^{-3}$ | $1 \times 10^{-1}$ | $1 \times 10^{-2}$ | $1 \times 10^1$ | $1 \times 10^{-1}$ | $1 \times 10^2$ | $1 \times 10^1$ |
| Lstsq          | 0.71               | 3.46               | 2.93               | 0.75               | 0.87               | 0.18               | 1.05            | 3.19               | 0.68            | 0.09            |
| Lstsq (nr)     | <b>0.61</b>        | 3.26               | <b>2.67</b>        | 0.7                | <b>0.8</b>         | 0.14               | <b>1.01</b>     | 3.19               | -               | -               |
| np.inv         | <b>0.4</b>         | 3.84               | <b>1.44</b>        | 0.66               | <b>0.86</b>        | 2.88               | <b>0.57</b>     | 2.37               | <b>0.21</b>     | 0.17            |
| np.inv (nr)    | <b>0.33</b>        | 6.36               | <b>1.42</b>        | 1.02               | <b>0.89</b>        | 3.46               | <b>0.52</b>     | 3.81               | -               | -               |
| np.solve       | <b>0.4</b>         | 6.03               | <b>1.78</b>        | 45.32              | <b>0.85</b>        | 5.36               | <b>0.53</b>     | 1.74               | <b>0.17</b>     | 0.06            |
| np.solve (nr)  | <b>0.31</b>        | 3.62               | <b>1.54</b>        | 26.85              | <b>0.79</b>        | 1.85               | <b>0.53</b>     | 1.5                | -               | -               |
| np.svd         | <b>0.69</b>        | 4.93               | <b>3.86</b>        | 1.02               | <b>1.35</b>        | 0.33               | <b>0.99</b>     | 1.71               | <b>0.99</b>     | 0.53            |
| sp.svd         | <b>0.83</b>        | 4.86               | <b>3.88</b>        | 2.58               | <b>1.32</b>        | 0.36               | <b>0.9</b>      | 1.48               | -               | -               |
| Cho.Dec        | 0.71               | 4.82               | <b>1.46</b>        | 0.4                | <b>0.3</b>         | 0.06               | <b>0.36</b>     | 1.57               | <b>0.19</b>     | 0.05            |
| rKrSVD02       | <b>1.38</b>        | 7.81               | <b>8.18</b>        | 4.46               | <b>3.02</b>        | 3.01               | <b>2.02</b>     | 3.11               | <b>2.75</b>     | 3.08            |
| rKrSVD04       | <b>2.66</b>        | 24.14              | <b>18.28</b>       | 5.84               | <b>5.41</b>        | 3.46               | <b>4.89</b>     | 46.35              | <b>7.98</b>     | 12.9            |
| rKrSVD06       | <b>5.86</b>        | 175.01             | <b>27.47</b>       | 11.01              | <b>7.68</b>        | 6.67               | <b>8.82</b>     | 138.23             | <b>15.73</b>    | 28.32           |
| rKrSVD08       | <b>9.75</b>        | 31.69              | <b>31.5</b>        | 13.87              | <b>10.12</b>       | 3.88               | <b>13.63</b>    | 246.86             | -               | -               |
| rKrSVD10       | <b>9.3</b>         | 23.94              | <b>36.57</b>       | 24.79              | <b>11.61</b>       | 8.62               | <b>18.98</b>    | 367.6              | -               | -               |
| skrSVD02       | <b>2.08</b>        | 4.19               | <b>12.58</b>       | 19.79              | <b>3.31</b>        | 0.85               | <b>2.32</b>     | 3.86               | <b>3.08</b>     | 3.69            |
| skrSVD04       | <b>4.18</b>        | 8.45               | <b>21.29</b>       | 6.05               | <b>5.98</b>        | 4.55               | <b>5.16</b>     | 51.83              | <b>8.68</b>     | 14.9            |
| skrSVD06       | <b>7.95</b>        | 19.95              | <b>30.11</b>       | 11.45              | <b>8.11</b>        | 8.98               | <b>9.21</b>     | 139.95             | <b>16.59</b>    | 31.63           |
| skrSVD08       | <b>7.69</b>        | 58.72              | <b>34.12</b>       | 28.07              | <b>9.74</b>        | 2.79               | <b>14.1</b>     | 250.61             | -               | -               |
| skrSVD10       | <b>10.43</b>       | 78.93              | <b>37.07</b>       | 23.16              | <b>11.72</b>       | 3.65               | <b>19.49</b>    | 371.08             | -               | -               |
| SVDU           | <b>0.23</b>        | 0.86               | <b>0.5</b>         | 0.29               | <b>0.11</b>        | 0.06               | -               | -                  | -               | -               |

**Table S11.** Process time (s) for  $K = 20$ . Bolded numbers differ statistically from *Lstsq*.

| Dataset        | BC                 |                    | BH                 |                    | AC                 |                    | CA              |                    | CE              |                 |
|----------------|--------------------|--------------------|--------------------|--------------------|--------------------|--------------------|-----------------|--------------------|-----------------|-----------------|
|                | $\bar{x}$          | $\sigma$           | $\bar{x}$          | $\sigma$           | $\bar{x}$          | $\sigma$           | $\bar{x}$       | $\sigma$           | $\bar{x}$       | $\sigma$        |
| Method / coef. | $1 \times 10^{-2}$ | $1 \times 10^{-4}$ | $1 \times 10^{-1}$ | $1 \times 10^{-2}$ | $1 \times 10^{-1}$ | $1 \times 10^{-2}$ | $1 \times 10^1$ | $1 \times 10^{-1}$ | $1 \times 10^2$ | $1 \times 10^1$ |
| Lstsq          | 1.41               | 4.43               | 0.91               | 0.17               | 4.47               | 3.55               | 3.08            | 5.12               | 4.68            | 2.74            |
| Lstsq (nr)     | <b>1.29</b>        | 4.04               | <b>0.87</b>        | 0.14               | <b>4.33</b>        | 3.26               | <b>2.95</b>     | 4.61               | -               | -               |
| np.inv         | <b>1.05</b>        | 7.34               | <b>1.06</b>        | 7.99               | <b>3.49</b>        | 8.57               | <b>0.8</b>      | 2.74               | <b>0.63</b>     | 0.41            |
| np.inv (nr)    | <b>0.96</b>        | 5.6                | <b>0.91</b>        | 0.34               | <b>3.38</b>        | 5.06               | <b>0.79</b>     | 3.68               | -               | -               |
| np.solve       | <b>0.99</b>        | 5.77               | 1.12               | 9.15               | <b>3.42</b>        | 5.89               | <b>0.73</b>     | 3.05               | <b>0.49</b>     | 0.18            |
| np.solve (nr)  | <b>0.91</b>        | 5.81               | <b>0.91</b>        | 0.51               | <b>3.44</b>        | 9.17               | <b>0.71</b>     | 2.67               | -               | -               |
| np.svd         | <b>1.53</b>        | 4.54               | <b>1.35</b>        | 0.52               | <b>4.3</b>         | 2.1                | <b>2.95</b>     | 4.31               | 4.78            | 5.58            |
| sp.svd         | <b>1.65</b>        | 3.57               | <b>1.29</b>        | 0.36               | <b>4.21</b>        | 1.46               | <b>2.73</b>     | 4.03               | -               | -               |
| Cho.Dec        | <b>0.91</b>        | 4.61               | <b>0.24</b>        | 0.05               | <b>0.67</b>        | 0.13               | <b>0.52</b>     | 0.93               | <b>0.61</b>     | 0.32            |
| rKrSVD02       | <b>2.09</b>        | 4.03               | <b>1.44</b>        | 0.38               | <b>4.74</b>        | 3.3                | <b>3.34</b>     | 4.66               | <b>5.19</b>     | 5.1             |
| rKrSVD04       | <b>3.58</b>        | 16.01              | <b>2.68</b>        | 0.73               | <b>8.29</b>        | 2.49               | <b>6.81</b>     | 52.26              | <b>11.24</b>    | 16.8            |
| rKrSVD06       | <b>6.93</b>        | 17.37              | <b>3.77</b>        | 4.25               | <b>10.87</b>       | 7.11               | <b>11.04</b>    | 144.73             | <b>19.5</b>     | 33.04           |
| rKrSVD08       | <b>10.79</b>       | 31.3               | <b>4.25</b>        | 3.81               | <b>13.31</b>       | 3.89               | <b>16.18</b>    | 256.66             | -               | -               |
| rKrSVD10       | <b>10.6</b>        | 118.74             | <b>4.77</b>        | 3.96               | <b>14.81</b>       | 4.42               | <b>22.12</b>    | 384.69             | -               | -               |
| skrSVD02       | <b>2.93</b>        | 4.98               | <b>1.76</b>        | 0.56               | <b>5.23</b>        | 2.41               | <b>3.88</b>     | 5.42               | <b>5.88</b>     | 6.58            |
| skrSVD04       | <b>5.19</b>        | 41.87              | <b>3.07</b>        | 1.92               | <b>9.00</b>        | 6.62               | <b>7.37</b>     | 59.56              | <b>12.44</b>    | 19.19           |
| skrSVD06       | <b>9.02</b>        | 18.26              | <b>4.12</b>        | 2.81               | <b>11.4</b>        | 5.04               | <b>11.99</b>    | 153.22             | <b>21.39</b>    | 37.31           |
| skrSVD08       | <b>8.87</b>        | 16.33              | <b>4.57</b>        | 4.16               | <b>13.99</b>       | 4.12               | <b>17.37</b>    | 269.13             | -               | -               |
| skrSVD10       | <b>11.68</b>       | 37.99              | <b>4.93</b>        | 4.56               | <b>15.75</b>       | 4.59               | <b>23.63</b>    | 404.46             | -               | -               |
| SVDU           | <b>69.47</b>       | 415.75             | <b>45.84</b>       | 73.05              | <b>166.61</b>      | 242.93             | -               | -                  | -               | -               |

**Table S12.** Process time (s) for  $K = 30$ . Bolded numbers differ statistically from *Lstsq*.

| Dataset        | BC                 |                    | BH                 |                    | AC              |                    | CA              |                 | CE              |                 |
|----------------|--------------------|--------------------|--------------------|--------------------|-----------------|--------------------|-----------------|-----------------|-----------------|-----------------|
|                | $\bar{x}$          | $\sigma$           | $\bar{x}$          | $\sigma$           | $\bar{x}$       | $\sigma$           | $\bar{x}$       | $\sigma$        | $\bar{x}$       | $\sigma$        |
| Method / coef. | $1 \times 10^{-2}$ | $1 \times 10^{-3}$ | $1 \times 10^{-1}$ | $1 \times 10^{-2}$ | $1 \times 10^1$ | $1 \times 10^{-2}$ | $1 \times 10^1$ | $1 \times 10^1$ | $1 \times 10^3$ | $1 \times 10^2$ |
| Lstsq          | 3.71               | 1.00               | 2.74               | 0.54               | 1.09            | 7.48               | 6.98            | 0.82            | 2.17            | 2.33            |
| Lstsq (nr)     | <b>3.54</b>        | 1.01               | <b>2.65</b>        | 0.6                | <b>1.06</b>     | 7.67               | <b>6.79</b>     | 0.92            | -               | -               |
| np.inv         | <b>2.19</b>        | 1.03               | <b>2.2</b>         | 4.91               | <b>0.7</b>      | 11.07              | <b>1.34</b>     | 0.4             | <b>0.13</b>     | 0.07            |
| np.inv (nr)    | <b>2.64</b>        | 37.42              | <b>2.17</b>        | 3.04               | <b>0.7</b>      | 9.26               | <b>1.28</b>     | 0.47            | -               | -               |
| np.solve       | <b>2.3</b>         | 17.7               | <b>2.31</b>        | 7.95               | <b>0.71</b>     | 12.19              | <b>1.18</b>     | 0.42            | <b>0.1</b>      | 0.05            |
| np.solve (nr)  | <b>2.54</b>        | 37.45              | <b>2.14</b>        | 2.07               | <b>0.69</b>     | 11.2               | <b>1.14</b>     | 0.41            | -               | -               |
| np.svd         | <b>3.33</b>        | 0.89               | <b>2.9</b>         | 0.9                | <b>0.75</b>     | 5.67               | <b>5.92</b>     | 1.97            | <b>1.46</b>     | 2.05            |
| sp.svd         | <b>3.43</b>        | 0.87               | <b>2.85</b>        | 1.67               | <b>0.73</b>     | 10.34              | <b>5.67</b>     | 2.47            | -               | -               |
| Cho.Dec        | <b>1.28</b>        | 0.63               | <b>0.37</b>        | 0.17               | <b>0.13</b>     | 0.47               | <b>1.02</b>     | 0.27            | <b>0.12</b>     | 0.05            |
| rKrSVD02       | <b>2.37</b>        | 0.43               | <b>1.68</b>        | 1.77               | <b>0.58</b>     | 5.12               | <b>4.07</b>     | 0.69            | <b>0.8</b>      | 0.94            |
| rKrSVD04       | <b>5.2</b>         | 3.98               | <b>3.71</b>        | 0.92               | <b>1.02</b>     | 8.73               | <b>9.06</b>     | 5.44            | <b>2.34</b>     | 3.6             |
| rKrSVD06       | <b>8.84</b>        | 1.75               | <b>5.52</b>        | 3.44               | <b>1.44</b>     | 15.73              | <b>13.95</b>    | 14.31           | <b>2.94</b>     | 4.96            |
| rKrSVD08       | <b>12.8</b>        | 3.13               | <b>6.00</b>        | 1.43               | <b>1.7</b>      | 4.86               | <b>19.48</b>    | 25.75           | -               | -               |
| rKrSVD10       | <b>12.6</b>        | 2.84               | <b>6.61</b>        | 1.84               | <b>1.89</b>     | 7.39               | <b>25.86</b>    | 39.04           | -               | -               |
| skrSVD02       | <b>4.2</b>         | 2.91               | <b>2.18</b>        | 0.41               | <b>0.63</b>     | 5.53               | <b>4.69</b>     | 0.81            | <b>0.88</b>     | 1.15            |
| skrSVD04       | <b>6.9</b>         | 4.89               | <b>4.12</b>        | 0.93               | <b>1.11</b>     | 9.29               | <b>9.96</b>     | 6.84            | <b>2.5</b>      | 3.99            |
| skrSVD06       | <b>11.17</b>       | 8.82               | <b>5.82</b>        | 2.83               | <b>1.51</b>     | 6.59               | <b>15.3</b>     | 16.58           | <b>3.15</b>     | 5.52            |
| skrSVD08       | <b>11.09</b>       | 1.96               | <b>6.34</b>        | 4.52               | <b>1.78</b>     | 4.73               | <b>21.21</b>    | 29.17           | -               | -               |
| skrSVD10       | <b>13.91</b>       | 2.73               | <b>6.84</b>        | 3.52               | <b>1.98</b>     | 5.32               | <b>27.85</b>    | 43.78           | -               | -               |
| SVDU           | <b>104.84</b>      | 45.74              | <b>75.01</b>       | 116.65             | <b>29.85</b>    | 178.95             | -               | -               | -               | -               |

**Table S13.** Process time (s) for  $K = 40$ . Bolded numbers differ statistically from *Lstsq*.

| Dataset        | BC                 |                    | BH                 |                    | AC              |                    | CA              |                 | CE              |                 |
|----------------|--------------------|--------------------|--------------------|--------------------|-----------------|--------------------|-----------------|-----------------|-----------------|-----------------|
|                | $\bar{x}$          | $\sigma$           | $\bar{x}$          | $\sigma$           | $\bar{x}$       | $\sigma$           | $\bar{x}$       | $\sigma$        | $\bar{x}$       | $\sigma$        |
| Method / coef. | $1 \times 10^{-2}$ | $1 \times 10^{-3}$ | $1 \times 10^{-1}$ | $1 \times 10^{-2}$ | $1 \times 10^1$ | $1 \times 10^{-2}$ | $1 \times 10^2$ | $1 \times 10^1$ | $1 \times 10^3$ | $1 \times 10^2$ |
| Lstsq          | 4.62               | 3.25               | 5.03               | 2.36               | 1.89            | 14.76              | 1.4             | 2.86            | 5.49            | 7.26            |
| Lstsq (nr)     | <b>4.46</b>        | 4.3                | <b>4.91</b>        | 2.41               | <b>1.82</b>     | 5.5                | <b>1.38</b>     | 2.88            | -               | -               |
| np.inv         | <b>5.57</b>        | 48.52              | <b>3.54</b>        | 5.7                | <b>1.03</b>     | 14.65              | <b>0.21</b>     | 0.7             | <b>0.23</b>     | 0.14            |
| np.inv (nr)    | <b>5.29</b>        | 27.8               | <b>3.49</b>        | 8.37               | <b>1.00</b>     | 6.74               | <b>0.2</b>      | 0.75            | -               | -               |
| np.solve       | <b>5.49</b>        | 37.29              | <b>3.64</b>        | 9.38               | <b>1.00</b>     | 11.00              | <b>0.18</b>     | 0.39            | <b>0.17</b>     | 0.09            |
| np.solve (nr)  | <b>5.71</b>        | 66.33              | <b>3.57</b>        | 8.18               | <b>1.00</b>     | 13.42              | <b>0.17</b>     | 0.55            | -               | -               |
| np.svd         | <b>5.5</b>         | 1.52               | <b>4.04</b>        | 1.08               | <b>1.15</b>     | 13.44              | <b>1.15</b>     | 9.97            | <b>3.25</b>     | 5.00            |
| sp.svd         | <b>5.57</b>        | 1.43               | <b>3.87</b>        | 0.98               | <b>1.13</b>     | 4.29               | <b>1.13</b>     | 10.69           | -               | -               |
| Cho.Dec        | <b>1.52</b>        | 0.61               | <b>0.56</b>        | 0.12               | <b>0.19</b>     | 0.32               | <b>0.17</b>     | 0.3             | <b>0.22</b>     | 0.08            |
| rKrSVD02       | <b>2.56</b>        | 0.52               | <b>2.05</b>        | 0.9                | <b>0.73</b>     | 6.3                | <b>0.49</b>     | 0.85            | <b>0.72</b>     | 0.63            |
| rKrSVD04       | <b>6.52</b>        | 1.48               | <b>4.47</b>        | 2.43               | <b>1.29</b>     | 5.7                | <b>1.27</b>     | 8.4             | <b>3.28</b>     | 4.54            |
| rKrSVD06       | <b>10.23</b>       | 2.03               | <b>6.04</b>        | 3.58               | <b>1.75</b>     | 12.19              | <b>2.41</b>     | 29.93           | 5.72            | 8.46            |
| rKrSVD08       | <b>14.88</b>       | 20.39              | <b>7.19</b>        | 4.75               | <b>2.17</b>     | 5.4                | <b>2.54</b>     | 32.29           | -               | -               |
| rKrSVD10       | <b>15.19</b>       | 6.86               | <b>8.06</b>        | 7.06               | <b>2.4</b>      | 7.93               | <b>3.24</b>     | 46.71           | -               | -               |
| skrSVD02       | <b>4.75</b>        | 26.04              | <b>2.53</b>        | 0.49               | <b>0.75</b>     | 4.98               | <b>0.56</b>     | 1.12            | <b>0.84</b>     | 0.88            |
| skrSVD04       | <b>8.52</b>        | 9.27               | <b>4.92</b>        | 3.4                | <b>1.41</b>     | 4.16               | <b>1.4</b>      | 11.11           | <b>3.55</b>     | 5.19            |
| skrSVD06       | <b>12.7</b>        | 9.88               | <b>6.38</b>        | 3.92               | <b>1.84</b>     | 4.06               | <b>2.57</b>     | 33.22           | <b>6.04</b>     | 9.89            |
| skrSVD08       | <b>13.03</b>       | 2.55               | <b>7.59</b>        | 6.37               | <b>2.23</b>     | 5.55               | <b>2.74</b>     | 36.77           | -               | -               |
| skrSVD10       | <b>16.61</b>       | 7.5                | <b>8.08</b>        | 1.96               | <b>2.49</b>     | 21.2               | <b>3.49</b>     | 53.82           | -               | -               |
| SVDU           | <b>49.86</b>       | 22.8               | <b>114.78</b>      | 142.93             | <b>44.98</b>    | 389.7              | -               | -               | -               | -               |

**Table S14.** Process time (s) for  $K = 50$ . Bolded numbers differ statistically from *Lstsq*.

| Dataset        | BC                 |                    | BH                 |                    | AC              |                    | CA              |                 | CE              |                 |
|----------------|--------------------|--------------------|--------------------|--------------------|-----------------|--------------------|-----------------|-----------------|-----------------|-----------------|
|                | $\bar{x}$          | $\sigma$           | $\bar{x}$          | $\sigma$           | $\bar{x}$       | $\sigma$           | $\bar{x}$       | $\sigma$        | $\bar{x}$       | $\sigma$        |
| Method / coef. | $1 \times 10^{-2}$ | $1 \times 10^{-3}$ | $1 \times 10^{-1}$ | $1 \times 10^{-2}$ | $1 \times 10^1$ | $1 \times 10^{-2}$ | $1 \times 10^2$ | $1 \times 10^1$ | $1 \times 10^3$ | $1 \times 10^2$ |
| Lstsq          | 8.08               | 5.85               | 9.25               | 12.04              | 2.78            | 6.92               | 2.88            | 1.63            | 9.81            | 12.28           |
| Lstsq (nr)     | <b>7.74</b>        | 1.57               | <b>8.99</b>        | 7.82               | <b>2.75</b>     | 10.53              | 2.88            | 1.77            | -               | -               |
| np.inv         | 8.8                | 57.52              | <b>5.46</b>        | 8.24               | <b>1.5</b>      | 15.93              | <b>0.29</b>     | 0.11            | <b>0.36</b>     | 0.18            |
| np.inv (nr)    | <b>8.48</b>        | 47.64              | <b>5.27</b>        | 3.89               | <b>1.47</b>     | 13.35              | <b>0.28</b>     | 0.1             | -               | -               |
| np.solve       | <b>9.83</b>        | 106.89             | <b>5.65</b>        | 12.11              | <b>1.47</b>     | 19.87              | <b>0.24</b>     | 0.06            | <b>0.26</b>     | 0.17            |
| np.solve (nr)  | <b>9.56</b>        | 91.57              | <b>5.43</b>        | 10.09              | <b>1.44</b>     | 21.34              | <b>0.23</b>     | 0.07            | -               | -               |
| np.svd         | <b>8.75</b>        | 2.76               | <b>5.79</b>        | 4.22               | <b>1.72</b>     | 15.16              | <b>2.46</b>     | 2.89            | <b>5.87</b>     | 10.18           |
| sp.svd         | <b>8.85</b>        | 9.66               | <b>5.6</b>         | 4.26               | <b>1.67</b>     | 5.67               | <b>2.44</b>     | 2.93            | -               | -               |
| Cho.Dec        | <b>1.89</b>        | 0.59               | <b>0.76</b>        | 0.21               | <b>0.29</b>     | 0.43               | <b>0.25</b>     | 0.06            | <b>0.34</b>     | 0.15            |
| rKrSVD02       | <b>2.68</b>        | 0.54               | <b>2.32</b>        | 1.09               | <b>0.82</b>     | 5.99               | <b>0.54</b>     | 0.08            | <b>0.8</b>      | 0.64            |
| rKrSVD04       | <b>6.93</b>        | 1.74               | <b>5.07</b>        | 5.29               | <b>1.51</b>     | 14.08              | <b>1.64</b>     | 1.24            | <b>4.28</b>     | 5.93            |
| rKrSVD06       | <b>12.14</b>       | 3.19               | <b>7.42</b>        | 6.47               | <b>2.18</b>     | 5.86               | <b>3.43</b>     | 4.25            | <b>8.08</b>     | 12.9            |
| rKrSVD08       | <b>17.44</b>       | 21.88              | <b>8.38</b>        | 2.85               | <b>2.72</b>     | 9.11               | <b>5.18</b>     | 7.79            | -               | -               |
| rKrSVD10       | <b>18.96</b>       | 22.02              | <b>10.05</b>       | 2.32               | <b>3.07</b>     | 8.59               | <b>4.57</b>     | 6.54            | -               | -               |
| skrSVD02       | <b>4.71</b>        | 0.95               | <b>2.95</b>        | 3.29               | <b>0.87</b>     | 2.57               | <b>0.64</b>     | 0.11            | <b>0.94</b>     | 1.06            |
| skrSVD04       | <b>9.56</b>        | 2.00               | <b>5.68</b>        | 3.08               | <b>1.66</b>     | 7.34               | <b>1.8</b>      | 1.61            | <b>4.6</b>      | 7.26            |
| skrSVD06       | <b>14.66</b>       | 4.14               | <b>7.76</b>        | 5.55               | <b>2.33</b>     | 5.17               | <b>3.66</b>     | 4.92            | <b>8.31</b>     | 13.98           |
| skrSVD08       | <b>16.06</b>       | 3.53               | <b>8.71</b>        | 1.87               | <b>2.78</b>     | 6.87               | <b>5.49</b>     | 8.53            | -               | -               |
| skrSVD10       | <b>20.1</b>        | 4.7                | <b>10.12</b>       | 5.4                | <b>3.09</b>     | 13.74              | <b>4.88</b>     | 7.3             | -               | -               |
| SVDU           | <b>199.23</b>      | 35.27              | <b>146.85</b>      | 180.49             | <b>61.48</b>    | 503.14             | -               | -               | -               | -               |



**Table S15.** Process time (s) for  $K = 60$ . Bolded numbers differ statistically from *Lstsq*.

| Dataset        | BC                 |                    | BH                 |                    | AC              |                    | CA              |                 | CE              |                 |
|----------------|--------------------|--------------------|--------------------|--------------------|-----------------|--------------------|-----------------|-----------------|-----------------|-----------------|
|                | $\bar{x}$          | $\sigma$           | $\bar{x}$          | $\sigma$           | $\bar{x}$       | $\sigma$           | $\bar{x}$       | $\sigma$        | $\bar{x}$       | $\sigma$        |
| Method / coef. | $1 \times 10^{-1}$ | $1 \times 10^{-3}$ | $1 \times 10^{-1}$ | $1 \times 10^{-2}$ | $1 \times 10^1$ | $1 \times 10^{-1}$ | $1 \times 10^2$ | $1 \times 10^1$ | $1 \times 10^3$ | $1 \times 10^2$ |
| Lstsq          | 1.13               | 2.35               | 12.32              | 2.64               | 4.00            | 0.97               | 6.44            | 5.73            | 16.29           | 20.62           |
| Lstsq (nr)     | <b>1.1</b>         | 2.52               | <b>12.17</b>       | 5.76               | 4.00            | 1.31               | 6.47            | 5.93            | -               | -               |
| np.inv         | <b>1.25</b>        | 27.89              | <b>7.52</b>        | 13.18              | <b>1.83</b>     | 1.21               | <b>0.39</b>     | 0.15            | <b>0.54</b>     | 0.27            |
| np.inv (nr)    | <b>1.27</b>        | 52.01              | <b>7.2</b>         | 7.32               | <b>1.83</b>     | 1.65               | <b>0.38</b>     | 0.09            | -               | -               |
| np.solve       | <b>1.25</b>        | 15.13              | <b>7.55</b>        | 13.1               | <b>1.84</b>     | 1.63               | <b>0.33</b>     | 0.08            | <b>0.39</b>     | 0.27            |
| np.solve (nr)  | <b>1.36</b>        | 85.89              | <b>7.49</b>        | 12.9               | <b>1.8</b>      | 1.37               | <b>0.32</b>     | 0.07            | -               | -               |
| np.svd         | <b>1.2</b>         | 4.31               | <b>6.72</b>        | 6.18               | <b>2.28</b>     | 1.7                | <b>7.22</b>     | 12.24           | <b>14.76</b>    | 20.75           |
| sp.svd         | <b>1.2</b>         | 3.7                | <b>6.46</b>        | 2.16               | <b>2.22</b>     | 1.04               | <b>7.24</b>     | 12.59           | -               | -               |
| Cho.Dec        | <b>0.22</b>        | 0.72               | <b>0.99</b>        | 0.7                | <b>0.35</b>     | 0.09               | <b>0.34</b>     | 0.09            | <b>0.51</b>     | 0.24            |
| rKrSVD02       | <b>0.29</b>        | 1.45               | <b>2.55</b>        | 0.68               | <b>0.91</b>     | 1.04               | <b>0.6</b>      | 0.1             | <b>0.91</b>     | 0.65            |
| rKrSVD04       | <b>0.73</b>        | 5.64               | <b>5.37</b>        | 1.19               | <b>1.62</b>     | 1.15               | <b>2.05</b>     | 1.7             | <b>5.33</b>     | 7.02            |
| rKrSVD06       | <b>1.44</b>        | 3.42               | <b>8.38</b>        | 2.4                | <b>2.59</b>     | 0.78               | <b>4.48</b>     | 5.72            | <b>10.02</b>    | 14.59           |
| rKrSVD08       | <b>2.06</b>        | 5.59               | <b>10.03</b>       | 14.34              | <b>3.24</b>     | 1.15               | 6.76            | 10.6            | -               | -               |
| rKrSVD10       | <b>2.23</b>        | 14.4               | <b>11.4</b>        | 7.67               | <b>3.67</b>     | 0.84               | <b>9.18</b>     | 15.63           | -               | -               |
| skrSVD02       | <b>0.49</b>        | 1.00               | <b>3.14</b>        | 0.69               | <b>0.94</b>     | 0.65               | <b>0.71</b>     | 0.12            | <b>1.04</b>     | 0.85            |
| skrSVD04       | <b>1.01</b>        | 2.13               | <b>6.15</b>        | 2.02               | <b>1.8</b>      | 0.77               | <b>2.24</b>     | 2.23            | <b>5.52</b>     | 7.67            |
| skrSVD06       | <b>1.76</b>        | 3.98               | <b>9.09</b>        | 9.73               | <b>2.76</b>     | 1.2                | <b>4.7</b>      | 6.64            | <b>10.49</b>    | 16.59           |
| skrSVD08       | <b>1.97</b>        | 4.4                | <b>10.2</b>        | 10.9               | <b>3.29</b>     | 1.21               | <b>7.00</b>     | 11.43           | -               | -               |
| skrSVD10       | <b>2.39</b>        | 5.66               | <b>11.41</b>       | 7.82               | <b>3.71</b>     | 0.87               | <b>9.44</b>     | 17.01           | -               | -               |
| SVDU           | <b>22.81</b>       | 26.09              | <b>191.38</b>      | 218.18             | <b>79.62</b>    | 39.45              | -               | -               | -               | -               |

**Table S16.** Process time (s) for  $K = 70$ . Bolded numbers differ statistically from *Lstsq*.

| Dataset        | BC                 |                    | BH                 |                    | AC              |                    | CA              |                 | CE              |                 |
|----------------|--------------------|--------------------|--------------------|--------------------|-----------------|--------------------|-----------------|-----------------|-----------------|-----------------|
|                | $\bar{x}$          | $\sigma$           | $\bar{x}$          | $\sigma$           | $\bar{x}$       | $\sigma$           | $\bar{x}$       | $\sigma$        | $\bar{x}$       | $\sigma$        |
| Method / coef. | $1 \times 10^{-1}$ | $1 \times 10^{-2}$ | $1 \times 10^{-1}$ | $1 \times 10^{-2}$ | $1 \times 10^1$ | $1 \times 10^{-1}$ | $1 \times 10^2$ | $1 \times 10^1$ | $1 \times 10^3$ | $1 \times 10^2$ |
| Lstsq          | 1.55               | 0.51               | 17.81              | 10.81              | 5.39            | 1.7                | 11.92           | 13.41           | 24.55           | 31.52           |
| Lstsq (nr)     | <b>1.52</b>        | 0.31               | 17.65              | 3.89               | <b>5.34</b>     | 1.38               | 11.9            | 13.17           | -               | -               |
| np.inv         | <b>1.74</b>        | 7.97               | <b>9.17</b>        | 14.43              | <b>2.32</b>     | 1.83               | <b>0.5</b>      | 0.18            | <b>0.75</b>     | 0.33            |
| np.inv (nr)    | <b>1.69</b>        | 6.2                | <b>8.91</b>        | 10.69              | <b>2.32</b>     | 1.69               | <b>0.48</b>     | 0.18            | -               | -               |
| np.solve       | <b>1.93</b>        | 10.79              | <b>8.9</b>         | 9.21               | <b>2.25</b>     | 1.3                | <b>0.42</b>     | 0.11            | <b>0.55</b>     | 0.35            |
| np.solve (nr)  | 1.6                | 1.52               | <b>8.95</b>        | 10.73              | <b>2.25</b>     | 1.49               | <b>0.41</b>     | 0.11            | -               | -               |
| np.svd         | 1.56               | 1.52               | <b>8.48</b>        | 6.57               | <b>2.81</b>     | 0.54               | <b>9.2</b>      | 15.63           | <b>19.32</b>    | 21.7            |
| sp.svd         | <b>1.51</b>        | 1.36               | <b>8.21</b>        | 7.04               | <b>2.78</b>     | 0.57               | <b>9.28</b>     | 15.47           | -               | -               |
| Cho.Dec        | <b>0.25</b>        | 0.1                | <b>1.34</b>        | 0.38               | <b>0.49</b>     | 0.12               | <b>0.45</b>     | 0.28            | <b>0.71</b>     | 0.31            |
| rKrSVD02       | <b>0.31</b>        | 0.29               | <b>2.78</b>        | 0.77               | <b>0.95</b>     | 0.7                | <b>0.66</b>     | 0.09            | <b>1.01</b>     | 0.75            |
| rKrSVD04       | <b>0.77</b>        | 0.87               | <b>5.92</b>        | 7.53               | <b>1.85</b>     | 1.3                | <b>2.49</b>     | 2.24            | <b>6.21</b>     | 9.00            |
| rKrSVD06       | <b>1.63</b>        | 1.96               | <b>9.17</b>        | 5.75               | <b>2.93</b>     | 1.23               | <b>5.39</b>     | 6.9             | <b>11.45</b>    | 16.65           |
| rKrSVD08       | <b>2.41</b>        | 2.95               | <b>11.63</b>       | 5.26               | <b>3.89</b>     | 2.25               | <b>8.5</b>      | 13.00           | -               | -               |
| rKrSVD10       | <b>2.63</b>        | 2.75               | <b>13.65</b>       | 6.34               | <b>4.48</b>     | 0.99               | <b>11.4</b>     | 18.04           | -               | -               |
| skrSVD02       | <b>0.52</b>        | 0.13               | <b>3.41</b>        | 0.65               | <b>1.04</b>     | 0.84               | <b>0.78</b>     | 0.13            | <b>1.16</b>     | 1.08            |
| skrSVD04       | <b>1.05</b>        | 0.23               | <b>6.61</b>        | 1.9                | <b>1.96</b>     | 0.38               | <b>2.67</b>     | 2.47            | <b>6.3</b>      | 9.28            |
| skrSVD06       | <b>2.07</b>        | 0.6                | <b>9.9</b>         | 6.16               | <b>3.11</b>     | 1.71               | <b>5.64</b>     | 7.34            | <b>12.2</b>     | 19.83           |
| skrSVD08       | <b>2.3</b>         | 0.72               | <b>11.71</b>       | 2.4                | <b>3.98</b>     | 1.47               | <b>8.66</b>     | 12.95           | -               | -               |
| skrSVD10       | <b>2.76</b>        | 0.98               | <b>13.21</b>       | 2.75               | <b>4.5</b>      | 0.87               | <b>11.67</b>    | 18.74           | -               | -               |
| SVDU           | <b>27.22</b>       | 2.78               | <b>234.85</b>      | 154.78             | <b>103.73</b>   | 74.91              | -               | -               | -               | -               |

**Table S17.** Process time (s) for  $K = 80$ . Bolded numbers differ statistically from *Lstsq*.

| Dataset        | BC                 |                    | BH              |                    | AC              |                    | CA              |                 | CE        |          |
|----------------|--------------------|--------------------|-----------------|--------------------|-----------------|--------------------|-----------------|-----------------|-----------|----------|
|                | $\bar{x}$          | $\sigma$           | $\bar{x}$       | $\sigma$           | $\bar{x}$       | $\sigma$           | $\bar{x}$       | $\sigma$        | $\bar{x}$ | $\sigma$ |
| Method / coef. | $1 \times 10^{-1}$ | $1 \times 10^{-2}$ | $1 \times 10^1$ | $1 \times 10^{-2}$ | $1 \times 10^1$ | $1 \times 10^{-1}$ | $1 \times 10^2$ | $1 \times 10^1$ | -         | -        |
| Lstsq          | 2.9                | 5.12               | 2.17            | 13.28              | 6.63            | 1.82               | 19.42           | 23.55           | -         | -        |
| Lstsq (nr)     | <b>2.81</b>        | 3.25               | 2.17            | 22.53              | <b>7.54</b>     | 5.2                | 19.4            | 25.48           | -         | -        |
| np.inv         | <b>2.38</b>        | 7.07               | <b>1.12</b>     | 15.77              | <b>2.74</b>     | 1.56               | <b>0.64</b>     | 0.24            | -         | -        |
| np.inv (nr)    | <b>2.34</b>        | 6.05               | <b>1.09</b>     | 11.02              | <b>2.72</b>     | 1.43               | <b>0.62</b>     | 0.31            | -         | -        |
| np.solve       | <b>2.48</b>        | 8.07               | <b>1.11</b>     | 13.21              | <b>2.71</b>     | 1.49               | <b>0.53</b>     | 0.19            | -         | -        |
| np.solve (nr)  | <b>2.44</b>        | 7.84               | <b>1.13</b>     | 19.49              | <b>2.71</b>     | 1.58               | <b>0.52</b>     | 0.23            | -         | -        |
| np.svd         | <b>1.91</b>        | 1.05               | <b>0.99</b>     | 4.23               | <b>3.45</b>     | 1.13               | <b>11.89</b>    | 19.1            | -         | -        |
| sp.svd         | <b>1.87</b>        | 0.51               | <b>0.97</b>     | 8.00               | <b>3.44</b>     | 0.9                | <b>11.96</b>    | 19.96           | -         | -        |
| Cho.Dec        | <b>0.29</b>        | 0.28               | <b>0.17</b>     | 1.12               | <b>0.59</b>     | 0.5                | <b>0.58</b>     | 0.37            | -         | -        |
| rKrSVD02       | <b>0.32</b>        | 0.18               | <b>0.3</b>      | 1.89               | <b>1.04</b>     | 0.58               | <b>0.73</b>     | 0.12            | -         | -        |
| rKrSVD04       | <b>0.82</b>        | 0.21               | <b>0.69</b>     | 8.89               | <b>2.14</b>     | 0.83               | <b>1.88</b>     | 0.95            | -         | -        |
| rKrSVD06       | <b>1.77</b>        | 1.51               | <b>0.97</b>     | 1.73               | <b>3.1</b>      | 0.61               | <b>6.44</b>     | 8.85            | -         | -        |
| rKrSVD08       | <b>2.77</b>        | 2.35               | <b>1.32</b>     | 4.1                | <b>4.48</b>     | 1.19               | <b>10.38</b>    | 15.63           | -         | -        |
| rKrSVD10       | <b>3.03</b>        | 0.94               | <b>1.61</b>     | 3.38               | <b>5.32</b>     | 1.43               | <b>14.11</b>    | 22.47           | -         | -        |
| skrSVD02       | <b>0.55</b>        | 0.43               | <b>0.38</b>     | 2.65               | <b>1.12</b>     | 0.27               | <b>0.86</b>     | 0.18            | -         | -        |
| skrSVD04       | <b>1.14</b>        | 0.95               | <b>0.81</b>     | 10.46              | <b>2.38</b>     | 0.67               | <b>2.1</b>      | 1.26            | -         | -        |
| skrSVD06       | <b>2.27</b>        | 2.27               | <b>1.05</b>     | 1.98               | <b>3.32</b>     | 1.1                | <b>6.83</b>     | 9.38            | -         | -        |
| skrSVD08       | <b>2.77</b>        | 2.79               | <b>1.35</b>     | 3.41               | <b>4.64</b>     | 2.22               | <b>10.8</b>     | 16.22           | -         | -        |
| skrSVD10       | <b>3.29</b>        | 5.16               | <b>1.51</b>     | 5.56               | <b>5.19</b>     | 0.91               | <b>14.56</b>    | 24.14           | -         | -        |
| SVDU           | <b>35.08</b>       | 6.2                | <b>27.53</b>    | 163.82             | <b>129.56</b>   | 55.15              | -               | -               | -         | -        |

**Table S18.** Process time (s) for  $K = 90$ . Bolded numbers differ statistically from *Lstsq*.

| Dataset        | BC                 |                    | BH              |                    | AC              |                    | CA              |                 | CE        |          |
|----------------|--------------------|--------------------|-----------------|--------------------|-----------------|--------------------|-----------------|-----------------|-----------|----------|
|                | $\bar{x}$          | $\sigma$           | $\bar{x}$       | $\sigma$           | $\bar{x}$       | $\sigma$           | $\bar{x}$       | $\sigma$        | $\bar{x}$ | $\sigma$ |
| Method / coef. | $1 \times 10^{-1}$ | $1 \times 10^{-2}$ | $1 \times 10^1$ | $1 \times 10^{-2}$ | $1 \times 10^1$ | $1 \times 10^{-1}$ | $1 \times 10^2$ | $1 \times 10^1$ | -         | -        |
| Lstsq          | 3.57               | 2.6                | 2.57            | 14.37              | 8.24            | 2.01               | 28.74           | 37.33           | -         | -        |
| Lstsq (nr)     | 3.58               | 5.09               | <b>2.52</b>     | 5.86               | 8.25            | 3.67               | 29.04           | 40.28           | -         | -        |
| np.inv         | <b>2.73</b>        | 5.36               | <b>1.33</b>     | 9.29               | <b>3.15</b>     | 1.94               | <b>0.8</b>      | 0.4             | -         | -        |
| np.inv (nr)    | <b>2.61</b>        | 0.81               | <b>1.31</b>     | 10.47              | <b>3.11</b>     | 1.8                | <b>0.78</b>     | 0.45            | -         | -        |
| np.solve       | <b>2.77</b>        | 3.57               | <b>1.36</b>     | 20.7               | <b>3.14</b>     | 1.89               | <b>0.66</b>     | 0.37            | -         | -        |
| np.solve (nr)  | <b>2.79</b>        | 8.19               | <b>1.31</b>     | 12.11              | <b>3.08</b>     | 1.91               | <b>0.64</b>     | 0.36            | -         | -        |
| np.svd         | <b>2.12</b>        | 1.52               | <b>1.21</b>     | 12.51              | <b>4.22</b>     | 1.42               | <b>14.37</b>    | 24.44           | -         | -        |
| sp.svd         | <b>2.08</b>        | 2.17               | <b>1.15</b>     | 11.00              | <b>4.11</b>     | 2.00               | <b>14.33</b>    | 23.87           | -         | -        |
| Cho.Dec        | <b>0.36</b>        | 0.17               | <b>0.2</b>      | 0.76               | <b>0.76</b>     | 0.11               | <b>0.71</b>     | 0.46            | -         | -        |
| rKrSVD02       | <b>0.33</b>        | 0.23               | <b>0.33</b>     | 1.37               | <b>1.13</b>     | 0.24               | <b>0.8</b>      | 0.24            | -         | -        |
| rKrSVD04       | <b>0.87</b>        | 0.73               | <b>0.73</b>     | 2.3                | <b>2.3</b>      | 0.94               | <b>1.98</b>     | 1.06            | -         | -        |
| rKrSVD06       | <b>1.89</b>        | 0.49               | <b>1.04</b>     | 6.45               | <b>3.4</b>      | 1.16               | <b>7.27</b>     | 9.87            | -         | -        |
| rKrSVD08       | <b>2.97</b>        | 2.74               | <b>1.42</b>     | 16.97              | <b>4.85</b>     | 1.13               | <b>11.75</b>    | 18.25           | -         | -        |
| rKrSVD10       | <b>3.33</b>        | 4.54               | <b>1.77</b>     | 9.05               | <b>5.98</b>     | 1.43               | <b>16.58</b>    | 26.35           | -         | -        |
| skrSVD02       | <b>0.58</b>        | 0.75               | <b>0.4</b>      | 2.18               | <b>1.2</b>      | 0.73               | <b>0.95</b>     | 0.27            | -         | -        |
| skrSVD04       | <b>1.29</b>        | 1.5                | <b>0.82</b>     | 1.49               | <b>2.47</b>     | 1.08               | <b>2.22</b>     | 1.37            | -         | -        |
| skrSVD06       | <b>2.45</b>        | 3.05               | <b>1.11</b>     | 5.12               | <b>3.58</b>     | 0.77               | <b>7.67</b>     | 10.3            | -         | -        |
| skrSVD08       | <b>2.87</b>        | 4.24               | <b>1.47</b>     | 2.41               | <b>4.97</b>     | 0.87               | <b>12.42</b>    | 19.99           | -         | -        |
| skrSVD10       | <b>3.42</b>        | 3.04               | <b>1.73</b>     | 3.02               | <b>5.98</b>     | 1.56               | <b>17.22</b>    | 28.6            | -         | -        |
| SVDU           | <b>39.98</b>       | 4.21               | <b>34.13</b>    | 214.64             | <b>156.52</b>   | 43.84              | -               | -               | -         | -        |

**Table S19.** Process time (s) for  $K = 100$ . Bolded numbers differ statistically from *Lstsq*.

| Dataset        | BC                 |                    | BH              |                    | AC              |                    | CA              |                 | CE        |          |
|----------------|--------------------|--------------------|-----------------|--------------------|-----------------|--------------------|-----------------|-----------------|-----------|----------|
|                | $\bar{x}$          | $\sigma$           | $\bar{x}$       | $\sigma$           | $\bar{x}$       | $\sigma$           | $\bar{x}$       | $\sigma$        | $\bar{x}$ | $\sigma$ |
| Method / coef. | $1 \times 10^{-1}$ | $1 \times 10^{-2}$ | $1 \times 10^1$ | $1 \times 10^{-2}$ | $1 \times 10^1$ | $1 \times 10^{-1}$ | $1 \times 10^2$ | $1 \times 10^2$ | -         | -        |
| Lstsq          | 4.72               | 3.07               | 3.05            | 6.98               | 9.48            | 2.51               | 41.14           | 6.4             | -         | -        |
| Lstsq (nr)     | <b>4.75</b>        | 6.44               | 3.06            | 6.89               | 9.44            | 2.34               | 40.96           | 6.03            | -         | -        |
| np.inv         | <b>3.58</b>        | 8.24               | <b>1.57</b>     | 17.92              | <b>3.42</b>     | 2.04               | <b>1.01</b>     | 0.07            | -         | -        |
| np.inv (nr)    | <b>3.47</b>        | 8.22               | <b>1.55</b>     | 17.07              | <b>3.45</b>     | 3.02               | <b>0.98</b>     | 0.07            | -         | -        |
| np.solve       | <b>3.65</b>        | 9.79               | <b>1.52</b>     | 11.55              | <b>3.43</b>     | 2.05               | <b>0.83</b>     | 0.06            | -         | -        |
| np.solve (nr)  | <b>3.62</b>        | 10.12              | <b>1.51</b>     | 15.6               | <b>3.36</b>     | 2.15               | <b>0.81</b>     | 0.06            | -         | -        |
| np.svd         | <b>2.5</b>         | 1.63               | <b>1.46</b>     | 4.52               | <b>4.89</b>     | 1.15               | <b>17.71</b>    | 3.17            | -         | -        |
| sp.svd         | <b>2.41</b>        | 0.61               | <b>1.36</b>     | 7.84               | <b>4.74</b>     | 1.93               | <b>17.62</b>    | 3.27            | -         | -        |
| Cho.Dec        | <b>0.42</b>        | 0.34               | <b>0.26</b>     | 0.42               | <b>0.94</b>     | 0.38               | <b>0.89</b>     | 0.04            | -         | -        |
| rKrSVD02       | <b>0.35</b>        | 0.09               | <b>0.4</b>      | 6.79               | <b>1.15</b>     | 0.58               | <b>0.88</b>     | 0.02            | -         | -        |
| rKrSVD04       | <b>0.95</b>        | 0.28               | <b>0.77</b>     | 2.17               | <b>2.42</b>     | 1.9                | <b>2.11</b>     | 0.13            | -         | -        |
| rKrSVD06       | <b>2.00</b>        | 0.51               | <b>1.15</b>     | 14.89              | <b>3.57</b>     | 0.84               | <b>8.42</b>     | 1.28            | -         | -        |
| rKrSVD08       | <b>3.1</b>         | 1.41               | <b>1.5</b>      | 3.82               | <b>5.18</b>     | 0.89               | <b>13.52</b>    | 2.23            | -         | -        |
| rKrSVD10       | <b>3.68</b>        | 1.82               | <b>2.01</b>     | 6.03               | <b>6.66</b>     | 1.23               | <b>19.4</b>     | 3.29            | -         | -        |
| skrSVD02       | <b>0.59</b>        | 0.45               | <b>0.47</b>     | 6.26               | <b>1.23</b>     | 0.28               | <b>1.03</b>     | 0.03            | -         | -        |
| skrSVD04       | <b>1.38</b>        | 1.1                | <b>0.89</b>     | 2.17               | <b>2.58</b>     | 0.88               | <b>2.35</b>     | 0.17            | -         | -        |
| skrSVD06       | <b>2.55</b>        | 0.8                | <b>1.21</b>     | 8.18               | <b>3.81</b>     | 1.11               | <b>8.69</b>     | 1.33            | -         | -        |
| skrSVD08       | <b>2.99</b>        | 1.43               | <b>1.58</b>     | 3.19               | <b>5.33</b>     | 0.94               | <b>13.81</b>    | 2.4             | -         | -        |
| skrSVD10       | <b>3.86</b>        | 3.13               | <b>1.96</b>     | 4.61               | <b>6.8</b>      | 1.85               | <b>19.79</b>    | 3.41            | -         | -        |
| SVDU           | <b>42.67</b>       | 5.79               | <b>37.78</b>    | 184.8              | <b>178.72</b>   | 43.06              | -               | -               | -         | -        |

### 3. RMSE and process time tables for additional simulations

Tables Table S20 and Table S21 report the mean and standard deviation of MLM test error measured as RMSE value and process time taken in OLS evaluation for the additional simulations with *Census* and tables Table S22, Table S23 for *Mnist*. Contrary to other data tables, Table S20, Table S21, Table S22 and Table S23 are for one dataset only.

**Table S20.** RMSE for *Census* at reference point percentages [10%, 100%] for *Cholesky Decomposition* (CD) and for random SVD with remaining rank percentages [1%, 10%]. Bolded numbers differ statistically from *Cholesky Decomposition*.

| sk_rank_svd_xxx |                    |                    |                    |                    |                    |                    |                    |                    |                    |                    |                    |                    |
|-----------------|--------------------|--------------------|--------------------|--------------------|--------------------|--------------------|--------------------|--------------------|--------------------|--------------------|--------------------|--------------------|
| Method          | CD                 |                    | 001                |                    | 002                |                    | 003                |                    | 004                |                    | 005                |                    |
|                 | $\bar{x}$          | $\sigma$           |
| RefP / coef.    | $1 \times 10^{-2}$ | $1 \times 10^{-6}$ |
| 10              | 6.17               | 3.98               | <b>6.44</b>        | 3.86               | <b>6.28</b>        | 3.81               | 6.22               | 3.79               | 6.19               | 4.01               | 6.18               | 4.07               |
| 20              | 6.15               | 4.19               | <b>6.43</b>        | 3.89               | <b>6.27</b>        | 3.61               | 6.19               | 3.7                | 6.17               | 3.88               | 6.15               | 3.98               |
| 30              | 6.17               | 4.41               | <b>6.43</b>        | 3.87               | 6.26               | 3.74               | 6.19               | 3.8                | 6.16               | 3.91               | 6.14               | 4.06               |
| 40              | 6.18               | 4.49               | <b>6.43</b>        | 3.85               | 6.26               | 3.72               | 6.19               | 3.72               | 6.16               | 4.01               | 6.14               | 3.96               |
| 50              | 6.19               | 4.39               | <b>6.43</b>        | 3.98               | 6.26               | 3.83               | 6.19               | 3.75               | 6.16               | 4.02               | 6.14               | 3.94               |
| 60              | 6.21               | 4.41               | <b>6.43</b>        | 3.97               | 6.26               | 3.73               | 6.19               | 3.73               | 6.15               | 4.01               | 6.14               | 4.00               |
| 70              | 6.22               | 4.18               | <b>6.43</b>        | 3.79               | 6.25               | 3.78               | 6.18               | 3.84               | 6.15               | 4.06               | 6.13               | 4.05               |
| 80              | 6.23               | 4.09               | <b>6.43</b>        | 3.89               | 6.25               | 3.73               | 6.18               | 3.79               | 6.15               | 3.97               | <b>6.13</b>        | 3.98               |
| 90              | 6.24               | 4.03               | <b>6.43</b>        | 4.01               | 6.25               | 3.77               | 6.18               | 3.91               | <b>6.15</b>        | 4.07               | <b>6.13</b>        | 4.09               |
| 100             | 6.26               | 4.04               | <b>6.43</b>        | 3.8                | 6.25               | 3.76               | 6.18               | 3.9                | <b>6.15</b>        | 4.08               | <b>6.13</b>        | 4.08               |

  

| sk_rank_svd_xxx |                    |                    |                    |                    |                    |                    |                    |                    |                    |                    |                    |                    |
|-----------------|--------------------|--------------------|--------------------|--------------------|--------------------|--------------------|--------------------|--------------------|--------------------|--------------------|--------------------|--------------------|
| Method          | CD                 |                    | 006                |                    | 007                |                    | 008                |                    | 009                |                    | 010                |                    |
|                 | $\bar{x}$          | $\sigma$           |
| RefP / coef.    | $1 \times 10^{-2}$ | $1 \times 10^{-6}$ |
| 10              | 6.17               | 3.98               | 6.17               | 3.98               | 6.17               | 4.01               | 6.17               | 3.99               | 6.17               | 3.99               | 6.17               | 4.1                |
| 20              | 6.15               | 4.19               | 6.14               | 4.07               | 6.13               | 4.18               | 6.13               | 4.18               | 6.13               | 4.27               | 6.14               | 4.24               |
| 30              | 6.17               | 4.41               | 6.14               | 4.19               | 6.13               | 4.21               | 6.13               | 4.28               | 6.13               | 4.39               | 6.13               | 4.31               |
| 40              | 6.18               | 4.49               | 6.14               | 4.21               | 6.13               | 4.21               | 6.12               | 4.35               | 6.12               | 4.39               | 6.12               | 4.44               |
| 50              | 6.19               | 4.39               | 6.13               | 4.09               | 6.12               | 4.13               | 6.12               | 4.3                | 6.12               | 4.26               | 6.11               | 4.29               |
| 60              | 6.21               | 4.41               | 6.13               | 4.2                | 6.12               | 4.22               | 6.11               | 4.37               | 6.11               | 4.35               | 6.11               | 4.22               |
| 70              | 6.22               | 4.18               | <b>6.12</b>        | 4.14               | <b>6.12</b>        | 4.27               | <b>6.11</b>        | 4.44               | <b>6.11</b>        | 4.3                | <b>6.1</b>         | 4.44               |
| 80              | 6.23               | 4.09               | <b>6.12</b>        | 4.05               | <b>6.12</b>        | 4.11               | <b>6.11</b>        | 4.31               | <b>6.1</b>         | 4.35               | <b>6.1</b>         | 4.28               |
| 90              | 6.24               | 4.03               | <b>6.13</b>        | 4.07               | <b>6.11</b>        | 4.26               | <b>6.11</b>        | 4.32               | <b>6.1</b>         | 4.33               | <b>6.1</b>         | 4.3                |
| 100             | 6.26               | 4.04               | <b>6.12</b>        | 4.11               | <b>6.12</b>        | 4.13               | <b>6.11</b>        | 4.41               | <b>6.1</b>         | 4.18               | <b>6.1</b>         | 4.32               |

**Table S21.** Process time in seconds for *Census* at reference point percentages [10%, 100%] for *Cholesky Decomposition* (CD) and for random SVD with remaining rank percentages [1%, 10%]. Bolded numbers differ statistically from *Cholesky Decomposition*.

| sk_rank_svd_xxx |                   |                   |                   |                   |                   |                   |                   |                   |                   |                   |                   |                   |
|-----------------|-------------------|-------------------|-------------------|-------------------|-------------------|-------------------|-------------------|-------------------|-------------------|-------------------|-------------------|-------------------|
| Method          | CD                |                   | 001               |                   | 002               |                   | 003               |                   | 004               |                   | 005               |                   |
|                 | $\bar{x}$         | $\sigma$          |
| RefP / coef.    | 1x10 <sup>2</sup> | 1x10 <sup>3</sup> | 1x10 <sup>2</sup> | 1x10 <sup>2</sup> | 1x10 <sup>2</sup> | 1x10 <sup>3</sup> | 1x10 <sup>2</sup> | 1x10 <sup>3</sup> | 1x10 <sup>2</sup> | 1x10 <sup>2</sup> | 1x10 <sup>2</sup> | 1x10 <sup>3</sup> |
| 10              | 0.2               | 0.003             | <b>0.19</b>       | 0.03              | <b>0.28</b>       | 0.01              | <b>0.4</b>        | 0.001             | <b>0.51</b>       | 0.01              | <b>0.65</b>       | 0.01              |
| 20              | 0.67              | 0.08              | <b>0.39</b>       | 0.08              | <b>0.53</b>       | 0.01              | 0.68              | 0.02              | <b>0.83</b>       | 0.69              | <b>1.06</b>       | 0.15              |
| 30              | 1.48              | 0.77              | <b>0.7</b>        | 1.14              | <b>0.84</b>       | 0.06              | <b>1.08</b>       | 0.2               | <b>1.27</b>       | 3.45              | 1.52              | 0.46              |
| 40              | 2.33              | 0.67              | <b>1.01</b>       | 2.02              | <b>1.25</b>       | 0.32              | <b>1.65</b>       | 0.72              | <b>1.8</b>        | 11.58             | <b>2.03</b>       | 1.32              |
| 50              | 4.02              | 2.73              | <b>1.51</b>       | 6.99              | <b>1.94</b>       | 1.58              | <b>2.52</b>       | 1.07              | <b>2.53</b>       | 23.02             | <b>3.00</b>       | 2.56              |
| 60              | 6.04              | 2.82              | <b>2.28</b>       | 22.99             | <b>3.00</b>       | 1.84              | <b>3.46</b>       | 1.75              | <b>3.46</b>       | 31.76             | <b>4.03</b>       | 2.98              |
| 70              | 7.86              | 10.91             | <b>3.19</b>       | 72.58             | <b>3.68</b>       | 8.36              | <b>4.12</b>       | 7.32              | <b>4.12</b>       | 82.01             | <b>4.67</b>       | 8.93              |
| 80              | 9.58              | 3.44              | <b>3.26</b>       | 12.22             | <b>3.69</b>       | 1.85              | <b>4.27</b>       | 2.56              | <b>4.21</b>       | 9.97              | <b>4.83</b>       | 1.91              |
| 90              | 12.87             | 5.73              | <b>4.01</b>       | 3.44              | <b>4.46</b>       | 1.54              | <b>5.13</b>       | 2.1               | <b>5.09</b>       | 2.31              | <b>5.82</b>       | 2.04              |
| 100             | 15.72             | 8.17              | <b>4.75</b>       | 21.91             | <b>5.07</b>       | 1.45              | <b>5.65</b>       | 1.83              | <b>5.78</b>       | 2.39              | <b>6.46</b>       | 1.61              |
| sk_rank_svd_xxx |                   |                   |                   |                   |                   |                   |                   |                   |                   |                   |                   |                   |
| Method          | CD                |                   | 006               |                   | 007               |                   | 008               |                   | 009               |                   | 010               |                   |
|                 | $\bar{x}$         | $\sigma$          |
| RefP / coef.    | 1x10 <sup>2</sup> | 1x10 <sup>3</sup> | 1x10 <sup>2</sup> | 1x10 <sup>3</sup> | 1x10 <sup>2</sup> | 1x10 <sup>2</sup> | 1x10 <sup>2</sup> | 1x10 <sup>3</sup> | 1x10 <sup>2</sup> | 1x10 <sup>3</sup> | 1x10 <sup>2</sup> | 1x10 <sup>3</sup> |
| 10              | 0.2               | 0.003             | <b>0.78</b>       | 0.03              | <b>0.93</b>       | 0.74              | <b>1.08</b>       | 0.16              | <b>1.25</b>       | 0.25              | <b>1.44</b>       | 0.45              |
| 20              | 0.67              | 0.08              | <b>1.24</b>       | 0.28              | <b>1.43</b>       | 4.02              | <b>1.64</b>       | 0.64              | <b>1.86</b>       | 1.03              | <b>2.11</b>       | 1.27              |
| 30              | 1.48              | 0.77              | <b>1.76</b>       | 0.82              | <b>1.98</b>       | 9.53              | <b>2.27</b>       | 1.55              | <b>2.56</b>       | 2.24              | <b>2.84</b>       | 3.06              |
| 40              | 2.33              | 0.67              | 2.37              | 2.42              | <b>2.52</b>       | 19.17             | <b>2.89</b>       | 2.97              | <b>3.21</b>       | 4.12              | <b>3.61</b>       | 5.66              |
| 50              | 4.02              | 2.73              | <b>3.28</b>       | 3.03              | <b>3.46</b>       | 31.41             | <b>3.73</b>       | 4.37              | 3.98              | 4.64              | <b>4.65</b>       | 6.47              |
| 60              | 6.04              | 2.82              | <b>4.39</b>       | 4.36              | <b>4.41</b>       | 53.18             | <b>4.78</b>       | 6.23              | <b>5.2</b>        | 6.49              | 5.84              | 6.27              |
| 70              | 7.86              | 10.91             | <b>5.04</b>       | 10.24             | <b>5.24</b>       | 93.42             | <b>5.54</b>       | 9.31              | <b>6.21</b>       | 13.84             | <b>6.76</b>       | 19.2              |
| 80              | 9.58              | 3.44              | <b>5.03</b>       | 1.13              | <b>5.44</b>       | 12.35             | <b>5.76</b>       | 1.24              | <b>6.16</b>       | 2.4               | <b>6.69</b>       | 2.29              |
| 90              | 12.87             | 5.73              | <b>6.15</b>       | 2.15              | <b>6.4</b>        | 5.86              | <b>6.96</b>       | 1.67              | <b>7.45</b>       | 2.22              | <b>8.00</b>       | 2.83              |
| 100             | 15.72             | 8.17              | <b>6.82</b>       | 1.17              | <b>7.21</b>       | 5.36              | <b>7.72</b>       | 0.87              | <b>8.28</b>       | 1.78              | <b>8.74</b>       | 1.79              |

**Table S22.** RMSE for *Mnist* at reference point percentages [10%, 100%] for *Cholesky Decomposition* (CD) and for random SVD with remaining rank percentages [1%, 10%]. Bolded numbers differ statistically from *Cholesky Decomposition*.

| sk_rank_svd_xxx |                    |                    |                    |                    |                    |                    |                    |                    |                    |                    |                    |                    |
|-----------------|--------------------|--------------------|--------------------|--------------------|--------------------|--------------------|--------------------|--------------------|--------------------|--------------------|--------------------|--------------------|
| Method          | CD                 |                    | 001                |                    | 002                |                    | 003                |                    | 004                |                    | 005                |                    |
|                 | $\bar{x}$          | $\sigma$           |
| RefP / coef.    | $1 \times 10^{-2}$ | $1 \times 10^{-6}$ | $1 \times 10^{-1}$ | $1 \times 10^{-6}$ | $1 \times 10^{-1}$ | $1 \times 10^{-6}$ | $1 \times 10^{-2}$ | $1 \times 10^{-6}$ | $1 \times 10^{-2}$ | $1 \times 10^{-6}$ | $1 \times 10^{-2}$ | $1 \times 10^{-6}$ |
| 10              | 9.33               | 1.6                | <b>1.19</b>        | 1.64               | <b>1.06</b>        | 1.56               | <b>10.11</b>       | 1.65               | <b>9.86</b>        | 1.57               | <b>9.69</b>        | 1.59               |
| 20              | 8.67               | 1.62               | <b>1.18</b>        | 1.78               | <b>1.05</b>        | 1.65               | <b>9.95</b>        | 1.49               | <b>9.62</b>        | 1.51               | <b>9.42</b>        | 1.55               |
| 30              | 8.32               | 1.61               | <b>1.18</b>        | 1.54               | <b>1.05</b>        | 1.38               | <b>9.89</b>        | 1.62               | <b>9.53</b>        | 1.66               | <b>9.3</b>         | 1.61               |
| 40              | 8.08               | 1.63               | <b>1.18</b>        | 1.48               | <b>1.05</b>        | 1.47               | <b>9.85</b>        | 1.54               | <b>9.49</b>        | 1.77               | <b>9.23</b>        | 1.52               |
| 50              | 7.91               | 1.67               | <b>1.18</b>        | 1.71               | <b>1.04</b>        | 1.55               | <b>9.83</b>        | 1.66               | <b>9.46</b>        | 1.69               | <b>9.19</b>        | 1.73               |
| 60              | 7.77               | 1.75               | <b>1.18</b>        | 1.57               | <b>1.04</b>        | 1.49               | <b>9.83</b>        | 1.56               | <b>9.44</b>        | 1.71               | <b>9.17</b>        | 1.68               |
| 70              | 7.66               | 1.76               | <b>1.18</b>        | 1.61               | <b>1.04</b>        | 1.65               | <b>9.81</b>        | 1.59               | <b>9.43</b>        | 1.58               | <b>9.15</b>        | 1.6                |
| 80              | 7.56               | 1.69               | <b>1.18</b>        | 1.48               | <b>1.04</b>        | 1.68               | <b>9.81</b>        | 1.53               | <b>9.41</b>        | 1.71               | <b>9.13</b>        | 1.55               |
| 90              | 7.48               | 1.73               | <b>1.18</b>        | 1.62               | <b>1.04</b>        | 1.73               | <b>9.8</b>         | 1.56               | <b>9.41</b>        | 1.46               | <b>9.12</b>        | 1.59               |
| 100             | 7.41               | 1.71               | <b>1.18</b>        | 1.61               | <b>1.04</b>        | 1.59               | <b>9.8</b>         | 1.71               | <b>9.41</b>        | 1.69               | <b>9.11</b>        | 1.67               |

  

| sk_rank_svd_xxx |                    |                    |                    |                    |                    |                    |                    |                    |                    |                    |                    |                    |
|-----------------|--------------------|--------------------|--------------------|--------------------|--------------------|--------------------|--------------------|--------------------|--------------------|--------------------|--------------------|--------------------|
| Method          | CD                 |                    | 006                |                    | 007                |                    | 008                |                    | 009                |                    | 010                |                    |
|                 | $\bar{x}$          | $\sigma$           |
| RefP / coef.    | $1 \times 10^{-2}$ | $1 \times 10^{-6}$ |
| 10              | 9.33               | 1.6                | <b>9.57</b>        | 1.6                | <b>9.48</b>        | 1.59               | <b>9.42</b>        | 1.63               | 9.36               | 1.62               | 9.33               | 1.6                |
| 20              | 8.67               | 1.62               | <b>9.27</b>        | 1.55               | <b>9.16</b>        | 1.57               | <b>9.07</b>        | 1.52               | <b>9.00</b>        | 1.52               | <b>8.95</b>        | 1.6                |
| 30              | 8.32               | 1.61               | <b>9.13</b>        | 1.6                | <b>9.01</b>        | 1.59               | <b>8.91</b>        | 1.63               | <b>8.84</b>        | 1.56               | <b>8.77</b>        | 1.59               |
| 40              | 8.08               | 1.63               | <b>9.06</b>        | 1.46               | <b>8.92</b>        | 1.54               | <b>8.82</b>        | 1.55               | <b>8.73</b>        | 1.52               | <b>8.66</b>        | 1.48               |
| 50              | 7.91               | 1.67               | <b>9.00</b>        | 1.68               | <b>8.86</b>        | 1.58               | <b>8.75</b>        | 1.6                | <b>8.66</b>        | 1.64               | <b>8.59</b>        | 1.59               |
| 60              | 7.77               | 1.75               | <b>8.97</b>        | 1.73               | <b>8.82</b>        | 1.55               | <b>8.7</b>         | 1.61               | <b>8.61</b>        | 1.65               | <b>8.53</b>        | 1.59               |
| 70              | 7.66               | 1.76               | <b>8.94</b>        | 1.63               | <b>8.79</b>        | 1.56               | <b>8.67</b>        | 1.63               | <b>8.57</b>        | 1.63               | <b>8.49</b>        | 1.57               |
| 80              | 7.56               | 1.69               | <b>8.92</b>        | 1.56               | <b>8.76</b>        | 1.55               | <b>8.64</b>        | 1.55               | <b>8.53</b>        | 1.6                | <b>8.45</b>        | 1.51               |
| 90              | 7.48               | 1.73               | <b>8.91</b>        | 1.54               | <b>8.74</b>        | 1.5                | <b>8.61</b>        | 1.59               | <b>8.51</b>        | 1.54               | <b>8.42</b>        | 1.52               |
| 100             | 7.41               | 1.71               | <b>8.89</b>        | 1.56               | <b>8.73</b>        | 1.51               | <b>8.59</b>        | 1.58               | <b>8.48</b>        | 1.56               | <b>8.4</b>         | 1.42               |

**Table S23.** Process time in seconds for *Mnist* at reference point percentages [10%, 100%] for *Cholesky Decomposition* (CD) and for random SVD with remaining rank percentages [1%, 10%]. Bolded numbers differ statistically from *Cholesky Decomposition*.

| sk_rank_svd_xxx |                                |                               |                                |                               |                                |                               |                                |                               |                                |                               |                                |                               |
|-----------------|--------------------------------|-------------------------------|--------------------------------|-------------------------------|--------------------------------|-------------------------------|--------------------------------|-------------------------------|--------------------------------|-------------------------------|--------------------------------|-------------------------------|
| Method          | CD                             |                               | 001                            |                               | 002                            |                               | 003                            |                               | 004                            |                               | 005                            |                               |
| RefP / coef.    | $\bar{x}$<br>1x10 <sup>3</sup> | $\sigma$<br>1x10 <sup>6</sup> | $\bar{x}$<br>1x10 <sup>3</sup> | $\sigma$<br>1x10 <sup>4</sup> |
| 10              | 0.33                           | 0.00001                       | <b>0.27</b>                    | 0.002                         | <b>0.41</b>                    | 0.01                          | <b>0.57</b>                    | 0.03                          | <b>0.74</b>                    | 0.09                          | <b>0.98</b>                    | 0.24                          |
| 20              | 1.34                           | 0.003                         | <b>0.79</b>                    | 1.05                          | <b>1.01</b>                    | 1.12                          | <b>1.28</b>                    | 2.04                          | <b>1.52</b>                    | 3.33                          | <b>1.84</b>                    | 6.28                          |
| 30              | 3.08                           | 0.01                          | <b>1.48</b>                    | 1.82                          | <b>1.75</b>                    | 1.23                          | <b>2.05</b>                    | 1.41                          | <b>2.38</b>                    | 3.64                          | <b>2.77</b>                    | 5.88                          |
| 40              | 5.68                           | 0.03                          | <b>2.42</b>                    | 3.18                          | <b>2.76</b>                    | 3.56                          | <b>3.14</b>                    | 2.48                          | <b>3.51</b>                    | 4.44                          | <b>4.03</b>                    | 8.6                           |
| 50              | 9.5                            | 1.41                          | <b>3.91</b>                    | 51.79                         | <b>4.26</b>                    | 36.16                         | <b>4.62</b>                    | 24.57                         | <b>5.03</b>                    | 14.91                         | <b>5.6</b>                     | 16.25                         |
| 60              | 14.73                          | 3.66                          | <b>5.4</b>                     | 52.39                         | <b>5.93</b>                    | 64.04                         | <b>6.54</b>                    | 89.37                         | <b>7.17</b>                    | 117.21                        | <b>7.87</b>                    | 135.29                        |
| 70              | 20.25                          | 3.81                          | <b>6.82</b>                    | 49.46                         | <b>7.37</b>                    | 30.29                         | <b>8.09</b>                    | 84.25                         | <b>8.77</b>                    | 120.31                        | <b>9.46</b>                    | 113.56                        |
| 80              | 27.08                          | 2.96                          | <b>8.32</b>                    | 0.34                          | <b>9.00</b>                    | 0.53                          | <b>9.66</b>                    | 1.23                          | <b>10.36</b>                   | 2.03                          | <b>11.12</b>                   | 3.58                          |
| 90              | 43.64                          | 131.52                        | <b>12.36</b>                   | 1167.41                       | <b>13.02</b>                   | 1133.69                       | <b>14.34</b>                   | 1660.08                       | <b>14.79</b>                   | 1646.39                       | <b>15.23</b>                   | 1575.86                       |
| 100             | 52.6                           | 138.29                        | <b>13.51</b>                   | 225.74                        | <b>14.14</b>                   | 147.14                        | <b>14.89</b>                   | 182.74                        | <b>15.84</b>                   | 230.71                        | <b>16.81</b>                   | 219.76                        |
| sk_rank_svd_xxx |                                |                               |                                |                               |                                |                               |                                |                               |                                |                               |                                |                               |
| Method          | CD                             |                               | 006                            |                               | 007                            |                               | 008                            |                               | 009                            |                               | 010                            |                               |
| RefP / coef.    | $\bar{x}$<br>1x10 <sup>3</sup> | $\sigma$<br>1x10 <sup>6</sup> | $\bar{x}$<br>1x10 <sup>3</sup> | $\sigma$<br>1x10 <sup>5</sup> |
| 10              | 0.33                           | 0.00001                       | <b>1.39</b>                    | 0.06                          | <b>1.72</b>                    | 0.15                          | <b>2.06</b>                    | 0.2                           | <b>2.37</b>                    | 0.28                          | <b>2.75</b>                    | 0.5                           |
| 20              | 1.34                           | 0.003                         | <b>2.25</b>                    | 1.25                          | <b>2.7</b>                     | 1.47                          | <b>3.18</b>                    | 2.26                          | <b>3.71</b>                    | 2.75                          | <b>4.38</b>                    | 4.74                          |
| 30              | 3.08                           | 0.01                          | <b>3.27</b>                    | 1.15                          | <b>3.79</b>                    | 1.33                          | <b>4.23</b>                    | 1.82                          | <b>4.89</b>                    | 2.49                          | <b>5.52</b>                    | 3.49                          |
| 40              | 5.68                           | 0.03                          | <b>4.6</b>                     | 1.61                          | <b>5.17</b>                    | 1.57                          | 5.85                           | 2.96                          | <b>6.38</b>                    | 3.54                          | <b>7.15</b>                    | 5.29                          |
| 50              | 9.5                            | 1.41                          | <b>6.21</b>                    | 4.53                          | <b>6.86</b>                    | 6.12                          | <b>7.5</b>                     | 9.34                          | <b>8.18</b>                    | 8.19                          | <b>9.19</b>                    | 16.37                         |
| 60              | 14.73                          | 3.66                          | <b>8.62</b>                    | 22.9                          | <b>9.56</b>                    | 30.78                         | <b>10.37</b>                   | 37.53                         | <b>10.99</b>                   | 39.53                         | <b>12.11</b>                   | 50.69                         |
| 70              | 20.25                          | 3.81                          | <b>10.26</b>                   | 15.76                         | <b>11.1</b>                    | 15.99                         | <b>12.04</b>                   | 31.91                         | <b>13.09</b>                   | 43.39                         | <b>14.00</b>                   | 34.44                         |
| 80              | 27.08                          | 2.96                          | <b>11.94</b>                   | 0.82                          | <b>12.81</b>                   | 1.15                          | <b>13.69</b>                   | 1.32                          | <b>14.59</b>                   | 1.49                          | <b>15.69</b>                   | 1.75                          |
| 90              | 43.64                          | 131.52                        | <b>16.12</b>                   | 150.63                        | <b>16.96</b>                   | 107.47                        | <b>18.4</b>                    | 162.85                        | <b>20.02</b>                   | 184.62                        | <b>20.93</b>                   | 136.39                        |
| 100             | 52.6                           | 138.29                        | <b>17.74</b>                   | 32.43                         | <b>18.78</b>                   | 20.1                          | <b>19.83</b>                   | 20.77                         | <b>21.2</b>                    | 28.97                         | <b>22.41</b>                   | 29.42                         |

#### 4. Deep neural network results

Tables S24 and S25 report the mean, standard deviation and the best (minimum) RMSE and process time taken of the used DNN on the studied datasets.

**Table S24.** RMSE for neural networks.

| Dataset / coef.   | FNN-4                           |                                | FNN-2                           |                                |
|-------------------|---------------------------------|--------------------------------|---------------------------------|--------------------------------|
|                   | $\bar{x}$<br>1x10 <sup>-2</sup> | $\sigma$<br>1x10 <sup>-3</sup> | $\bar{x}$<br>1x10 <sup>-2</sup> | $\sigma$<br>1x10 <sup>-3</sup> |
| BreastCancer      | 25.7                            | 22.88                          | 25.52                           | 22.9                           |
| BostonHousing     | 10.23                           | 10.33                          | 9.86                            | 11.09                          |
| AirplaneCompanies | 6.89                            | 4.4                            | 7.19                            | 4.29                           |
| ComputerActivity  | 2.48                            | 0.62                           | 2.49                            | 0.62                           |
| Census            | 6.7                             | 1.99                           | 6.71                            | 2.00                           |
| Mnist             | 6.1                             | 3.28                           | 8.28                            | 1.54                           |
| AuN2-4k           | 3.18                            | 1.00                           | 3.42                            | 0.83                           |
| AuN2-8k           | 2.67                            | 0.68                           | 2.97                            | 0.73                           |
| AuN2-12k          | 2.15                            | 0.73                           | 3.42                            | 0.83                           |
| AuN10-4k          | 1.17                            | 0.45                           | 1.21                            | 0.47                           |
| AuN10-8k          | 0.85                            | 0.21                           | 0.88                            | 0.29                           |
| AuN10-12k         | 1.4                             | 6.22                           | 15.49                           | 207.22                         |
| AuN100-4k         | 1.96                            | 1.35                           | 38.75                           | 156.31                         |
| AuN100-8k         | 1.83                            | 1.28                           | 37.6                            | 193.52                         |
| AuN100-12k        | 1.96                            | 1.35                           | 38.75                           | 156.31                         |

**Table S25.** Process time (s) for neural networks.

| Dataset / coef.   | FNN-4                          |                               | FNN-2                          |                               |
|-------------------|--------------------------------|-------------------------------|--------------------------------|-------------------------------|
|                   | $\bar{x}$<br>1x10 <sup>3</sup> | $\sigma$<br>1x10 <sup>2</sup> | $\bar{x}$<br>1x10 <sup>3</sup> | $\sigma$<br>1x10 <sup>2</sup> |
| BreastCancer      | 0.06                           | 0.01                          | 0.06                           | 0.01                          |
| BostonHousing     | 0.15                           | 0.02                          | 0.13                           | 0.03                          |
| AirplaneCompanies | 0.23                           | 0.02                          | 0.18                           | 0.06                          |
| ComputerActivity  | 2.4                            | 0.51                          | 2.22                           | 0.21                          |
| Census            | 4.54                           | 1.08                          | 3.97                           | 1.3                           |
| Mnist             | 28.4                           | 23.94                         | 43.36                          | 9.47                          |
| AuN2-4k           | 1.05                           | 0.36                          | 1.00                           | 0.4                           |
| AuN2-8k           | 2.22                           | 0.51                          | 2.15                           | 0.34                          |
| AuN2-12k          | 3.53                           | 0.44                          | 1.00                           | 0.4                           |
| AuN10-4k          | 1.86                           | 1.24                          | 1.39                           | 1.22                          |
| AuN10-8k          | 4.21                           | 1.87                          | 3.16                           | 1.41                          |
| AuN10-12k         | 18.74                          | 108.95                        | 3.34                           | 23.19                         |
| AuN100-4k         | 24.03                          | 61.34                         | 6.16                           | 7.29                          |
| AuN100-8k         | 47.11                          | 82.71                         | 10.35                          | 30.74                         |
| AuN100-12k        | 24.03                          | 61.34                         | 6.17                           | 7.13                          |

#### 5. Au<sub>38Q</sub> RMSE and process time tables

Tables S26–S35 report the normalized test RMSE of MLM on the variants of Au<sub>38Q</sub> dataset. Similarly

Tables S36–S45 report the process time taken in OLS evaluation.



**Table S26.** Normalized RMSE mean, standard deviation and best result for Au<sub>38</sub>Q  $K = 10$ . Bolded means  $\bar{x}$  differ statistically from *Cholesky decomposition*.

| Dataset        | AuN2-4k            |                    |                    | AuN2-8k            |                    |                    | AuN2-12k           |                    |                    |
|----------------|--------------------|--------------------|--------------------|--------------------|--------------------|--------------------|--------------------|--------------------|--------------------|
|                | $\bar{x}$          | $\sigma$           | min(x)             | $\bar{x}$          | $\sigma$           | min(x)             | $\bar{x}$          | $\sigma$           | min(x)             |
| Method / coef. | $1 \times 10^{-2}$ | $1 \times 10^{-3}$ | $1 \times 10^{-2}$ | $1 \times 10^{-2}$ | $1 \times 10^{-4}$ | $1 \times 10^{-2}$ | $1 \times 10^{-2}$ | $1 \times 10^{-4}$ | $1 \times 10^{-2}$ |
| cho_dec        | 3.27               | 1.54               | 2.97               | 2.39               | 7.67               | 2.23               | 1.89               | 6.22               | 1.76               |
| sk_rrSVD_001   | <b>5.3</b>         | 1.98               | 4.9                | <b>4.46</b>        | 7.15               | 4.32               | <b>3.93</b>        | 9.44               | 3.71               |
| sk_rrSVD_002   | <b>4.56</b>        | 1.62               | 4.08               | <b>3.7</b>         | 7.61               | 3.5                | <b>3.09</b>        | 7.59               | 2.96               |
| sk_rrSVD_003   | <b>4.17</b>        | 1.49               | 3.79               | <b>3.22</b>        | 8.77               | 2.97               | <b>2.61</b>        | 6.96               | 2.45               |
| sk_rrSVD_004   | <b>3.91</b>        | 1.55               | 3.5                | <b>2.92</b>        | 8.44               | 2.64               | <b>2.32</b>        | 7.5                | 2.15               |
| sk_rrSVD_005   | <b>3.7</b>         | 1.5                | 3.33               | <b>2.72</b>        | 8.2                | 2.5                | <b>2.16</b>        | 7.04               | 1.98               |
| sk_rrSVD_006   | <b>3.54</b>        | 1.52               | 3.19               | <b>2.59</b>        | 7.65               | 2.4                | <b>2.05</b>        | 7.02               | 1.89               |
| sk_rrSVD_007   | <b>3.43</b>        | 1.56               | 3.09               | <b>2.51</b>        | 8.04               | 2.33               | <b>1.98</b>        | 6.48               | 1.85               |
| sk_rrSVD_008   | <b>3.35</b>        | 1.61               | 3.04               | <b>2.45</b>        | 7.81               | 2.28               | <b>1.94</b>        | 6.37               | 1.8                |
| sk_rrSVD_009   | 3.3                | 1.55               | 3.00               | 2.42               | 7.95               | 2.24               | 1.91               | 6.38               | 1.78               |
| sk_rrSVD_010   | 3.27               | 1.54               | 2.97               | 2.39               | 7.67               | 2.23               | 1.89               | 6.25               | 1.76               |

  

| Dataset        | AuN10-4k           |                    |                    | AuN10-8k           |                    |                    | AuN10-12k          |                    |                    |
|----------------|--------------------|--------------------|--------------------|--------------------|--------------------|--------------------|--------------------|--------------------|--------------------|
|                | $\bar{x}$          | $\sigma$           | min(x)             | $\bar{x}$          | $\sigma$           | min(x)             | $\bar{x}$          | $\sigma$           | min(x)             |
| Method / coef. | $1 \times 10^{-2}$ | $1 \times 10^{-4}$ | $1 \times 10^{-2}$ | $1 \times 10^{-2}$ | $1 \times 10^{-4}$ | $1 \times 10^{-2}$ | $1 \times 10^{-2}$ | $1 \times 10^{-4}$ | $1 \times 10^{-2}$ |
| cho_dec        | 1.99               | 7.85               | 1.85               | 1.52               | 5.48               | 1.41               | 1.21               | 3.2                | 1.13               |
| sk_rrSVD_001   | <b>2.94</b>        | 9.79               | 2.75               | <b>2.47</b>        | 5.92               | 2.34               | <b>2.17</b>        | 4.22               | 2.1                |
| sk_rrSVD_002   | <b>2.59</b>        | 9.94               | 2.41               | <b>2.12</b>        | 5.14               | 2.00               | <b>1.8</b>         | 3.17               | 1.71               |
| sk_rrSVD_003   | <b>2.39</b>        | 9.04               | 2.24               | <b>1.94</b>        | 4.65               | 1.85               | <b>1.61</b>        | 3.03               | 1.55               |
| sk_rrSVD_004   | <b>2.26</b>        | 8.76               | 2.13               | <b>1.81</b>        | 4.91               | 1.74               | <b>1.49</b>        | 2.98               | 1.39               |
| sk_rrSVD_005   | <b>2.19</b>        | 8.61               | 2.01               | <b>1.72</b>        | 5.47               | 1.6                | <b>1.4</b>         | 3.15               | 1.32               |
| sk_rrSVD_006   | <b>2.13</b>        | 8.36               | 1.96               | <b>1.65</b>        | 5.16               | 1.56               | <b>1.34</b>        | 2.95               | 1.27               |
| sk_rrSVD_007   | <b>2.08</b>        | 8.26               | 1.94               | <b>1.6</b>         | 5.51               | 1.49               | <b>1.29</b>        | 3.15               | 1.22               |
| sk_rrSVD_008   | <b>2.04</b>        | 7.81               | 1.91               | <b>1.57</b>        | 5.41               | 1.45               | <b>1.25</b>        | 3.24               | 1.18               |
| sk_rrSVD_009   | 2.01               | 7.92               | 1.88               | 1.54               | 5.5                | 1.42               | <b>1.22</b>        | 3.18               | 1.15               |
| sk_rrSVD_010   | 1.99               | 7.85               | 1.85               | 1.52               | 5.48               | 1.41               | 1.21               | 3.2                | 1.13               |

  

| Dataset        | AuN100-4k          |                    |                    | AuN100-8k          |                    |                    | AuN100-12k         |                    |                    |
|----------------|--------------------|--------------------|--------------------|--------------------|--------------------|--------------------|--------------------|--------------------|--------------------|
|                | $\bar{x}$          | $\sigma$           | min(x)             | $\bar{x}$          | $\sigma$           | min(x)             | $\bar{x}$          | $\sigma$           | min(x)             |
| Method / coef. | $1 \times 10^{-2}$ | $1 \times 10^{-4}$ | $1 \times 10^{-2}$ | $1 \times 10^{-2}$ | $1 \times 10^{-4}$ | $1 \times 10^{-2}$ | $1 \times 10^{-2}$ | $1 \times 10^{-4}$ | $1 \times 10^{-2}$ |
| cho_dec        | 2.00               | 7.5                | 1.83               | 1.53               | 5.15               | 1.45               | 1.21               | 3.56               | 1.15               |
| sk_rrSVD_001   | <b>2.98</b>        | 8.82               | 2.8                | <b>2.5</b>         | 6.08               | 2.37               | <b>2.17</b>        | 4.83               | 2.08               |
| sk_rrSVD_002   | <b>2.61</b>        | 8.22               | 2.44               | <b>2.13</b>        | 5.57               | 2.01               | <b>1.8</b>         | 4.32               | 1.68               |
| sk_rrSVD_003   | <b>2.4</b>         | 7.94               | 2.26               | <b>1.95</b>        | 5.27               | 1.85               | <b>1.61</b>        | 3.62               | 1.52               |
| sk_rrSVD_004   | <b>2.28</b>        | 7.44               | 2.13               | <b>1.83</b>        | 4.45               | 1.74               | <b>1.49</b>        | 3.54               | 1.41               |
| sk_rrSVD_005   | <b>2.19</b>        | 7.55               | 2.03               | <b>1.73</b>        | 4.79               | 1.66               | <b>1.4</b>         | 3.51               | 1.31               |
| sk_rrSVD_006   | <b>2.13</b>        | 7.72               | 1.96               | <b>1.67</b>        | 4.94               | 1.58               | <b>1.33</b>        | 3.58               | 1.25               |
| sk_rrSVD_007   | <b>2.08</b>        | 7.33               | 1.92               | <b>1.62</b>        | 5.2                | 1.53               | <b>1.28</b>        | 3.55               | 1.22               |
| sk_rrSVD_008   | <b>2.05</b>        | 7.38               | 1.9                | <b>1.58</b>        | 5.02               | 1.51               | <b>1.25</b>        | 3.52               | 1.19               |
| sk_rrSVD_009   | 2.02               | 7.71               | 1.85               | 1.55               | 5.21               | 1.47               | 1.22               | 3.56               | 1.16               |
| sk_rrSVD_010   | 2.00               | 7.5                | 1.83               | 1.53               | 5.15               | 1.45               | 1.21               | 3.56               | 1.15               |

**Table S27.** Normalized RMSE mean, standard deviation and best result for Au<sub>38</sub>Q  $K = 20$ . Bolded means  $\bar{x}$  differ statistically from *Cholesky decomposition*.

| Dataset        | AuN2-4k            |                    |                    | AuN2-8k            |                    |                    | AuN2-12k           |                    |                    |
|----------------|--------------------|--------------------|--------------------|--------------------|--------------------|--------------------|--------------------|--------------------|--------------------|
|                | $\bar{x}$          | $\sigma$           | min(x)             | $\bar{x}$          | $\sigma$           | min(x)             | $\bar{x}$          | $\sigma$           | min(x)             |
| Method / coef. | $1 \times 10^{-2}$ | $1 \times 10^{-3}$ | $1 \times 10^{-2}$ | $1 \times 10^{-2}$ | $1 \times 10^{-4}$ | $1 \times 10^{-2}$ | $1 \times 10^{-2}$ | $1 \times 10^{-4}$ | $1 \times 10^{-2}$ |
| cho_dec        | 2.55               | 1.17               | 2.31               | 1.71               | 4.92               | 1.63               | 1.28               | 3.75               | 1.21               |
| sk_rrSVD_001   | <b>5.23</b>        | 1.83               | 4.81               | <b>4.44</b>        | 8.2                | 4.26               | <b>3.89</b>        | 8.89               | 3.68               |
| sk_rrSVD_002   | <b>4.48</b>        | 1.23               | 4.2                | <b>3.65</b>        | 7.35               | 3.49               | <b>3.01</b>        | 7.63               | 2.83               |
| sk_rrSVD_003   | <b>4.08</b>        | 1.25               | 3.78               | <b>3.14</b>        | 8.54               | 2.94               | <b>2.47</b>        | 6.73               | 2.34               |
| sk_rrSVD_004   | <b>3.79</b>        | 1.33               | 3.52               | <b>2.77</b>        | 7.18               | 2.59               | <b>2.15</b>        | 5.06               | 2.05               |
| sk_rrSVD_005   | <b>3.55</b>        | 1.47               | 3.19               | <b>2.52</b>        | 6.62               | 2.39               | <b>1.93</b>        | 4.8                | 1.85               |
| sk_rrSVD_006   | <b>3.36</b>        | 1.28               | 3.11               | <b>2.35</b>        | 5.95               | 2.25               | <b>1.78</b>        | 4.81               | 1.68               |
| sk_rrSVD_007   | <b>3.19</b>        | 1.38               | 2.93               | <b>2.21</b>        | 6.06               | 2.09               | <b>1.66</b>        | 4.12               | 1.56               |
| sk_rrSVD_008   | <b>3.07</b>        | 1.21               | 2.84               | <b>2.1</b>         | 5.78               | 1.99               | <b>1.57</b>        | 4.08               | 1.48               |
| sk_rrSVD_009   | <b>2.96</b>        | 1.27               | 2.69               | <b>2.02</b>        | 5.41               | 1.91               | <b>1.5</b>         | 4.27               | 1.41               |
| sk_rrSVD_010   | <b>2.87</b>        | 1.35               | 2.63               | <b>1.95</b>        | 5.92               | 1.85               | <b>1.45</b>        | 4.05               | 1.38               |

  

| Dataset        | AuN10-4k           |                    |                    | AuN10-8k           |                    |                    | AuN10-12k          |                    |                    |
|----------------|--------------------|--------------------|--------------------|--------------------|--------------------|--------------------|--------------------|--------------------|--------------------|
|                | $\bar{x}$          | $\sigma$           | min(x)             | $\bar{x}$          | $\sigma$           | min(x)             | $\bar{x}$          | $\sigma$           | min(x)             |
| Method / coef. | $1 \times 10^{-2}$ | $1 \times 10^{-4}$ | $1 \times 10^{-2}$ | $1 \times 10^{-2}$ | $1 \times 10^{-4}$ | $1 \times 10^{-2}$ | $1 \times 10^{-2}$ | $1 \times 10^{-4}$ | $1 \times 10^{-2}$ |
| cho_dec        | 1.62               | 6.15               | 1.51               | 1.14               | 3.87               | 1.05               | 0.88               | 2.33               | 0.83               |
| sk_rrSVD_001   | <b>2.88</b>        | 9.65               | 2.69               | <b>2.44</b>        | 5.49               | 2.34               | <b>2.15</b>        | 3.48               | 2.06               |
| sk_rrSVD_002   | <b>2.55</b>        | 8.9                | 2.37               | <b>2.07</b>        | 5.04               | 1.97               | <b>1.77</b>        | 3.21               | 1.69               |
| sk_rrSVD_003   | <b>2.33</b>        | 6.85               | 2.22               | <b>1.89</b>        | 4.00               | 1.82               | <b>1.57</b>        | 2.41               | 1.53               |
| sk_rrSVD_004   | <b>2.19</b>        | 6.72               | 2.01               | <b>1.75</b>        | 3.94               | 1.67               | <b>1.45</b>        | 2.83               | 1.39               |
| sk_rrSVD_005   | <b>2.09</b>        | 6.7                | 1.95               | <b>1.64</b>        | 3.73               | 1.53               | <b>1.34</b>        | 2.78               | 1.26               |
| sk_rrSVD_006   | <b>2.02</b>        | 6.44               | 1.91               | <b>1.55</b>        | 3.65               | 1.43               | <b>1.24</b>        | 2.75               | 1.17               |
| sk_rrSVD_007   | <b>1.96</b>        | 6.71               | 1.83               | <b>1.47</b>        | 3.47               | 1.37               | <b>1.17</b>        | 2.8                | 1.08               |
| sk_rrSVD_008   | <b>1.9</b>         | 6.51               | 1.77               | <b>1.41</b>        | 3.24               | 1.33               | <b>1.11</b>        | 2.44               | 1.05               |
| sk_rrSVD_009   | <b>1.85</b>        | 6.42               | 1.73               | <b>1.36</b>        | 3.09               | 1.28               | <b>1.07</b>        | 2.42               | 1.01               |
| sk_rrSVD_010   | <b>1.81</b>        | 6.6                | 1.68               | <b>1.32</b>        | 3.15               | 1.25               | <b>1.02</b>        | 2.14               | 0.98               |

  

| Dataset        | AuN100-4k          |                    |                    | AuN100-8k          |                    |                    | AuN100-12k         |                    |                    |
|----------------|--------------------|--------------------|--------------------|--------------------|--------------------|--------------------|--------------------|--------------------|--------------------|
|                | $\bar{x}$          | $\sigma$           | min(x)             | $\bar{x}$          | $\sigma$           | min(x)             | $\bar{x}$          | $\sigma$           | min(x)             |
| Method / coef. | $1 \times 10^{-2}$ | $1 \times 10^{-4}$ | $1 \times 10^{-2}$ | $1 \times 10^{-2}$ | $1 \times 10^{-4}$ | $1 \times 10^{-2}$ | $1 \times 10^{-2}$ | $1 \times 10^{-4}$ | $1 \times 10^{-2}$ |
| cho_dec        | 1.63               | 6.16               | 1.53               | 1.15               | 4.07               | 1.03               | 0.87               | 2.96               | 0.82               |
| sk_rrSVD_001   | <b>2.94</b>        | 8.98               | 2.73               | <b>2.47</b>        | 5.68               | 2.35               | <b>2.15</b>        | 4.89               | 2.06               |
| sk_rrSVD_002   | <b>2.57</b>        | 7.74               | 2.42               | <b>2.08</b>        | 5.15               | 1.97               | <b>1.76</b>        | 3.15               | 1.72               |
| sk_rrSVD_003   | <b>2.34</b>        | 7.37               | 2.24               | <b>1.89</b>        | 4.83               | 1.8                | <b>1.57</b>        | 3.2                | 1.51               |
| sk_rrSVD_004   | <b>2.19</b>        | 6.01               | 2.07               | <b>1.76</b>        | 3.96               | 1.67               | <b>1.44</b>        | 3.23               | 1.37               |
| sk_rrSVD_005   | <b>2.1</b>         | 5.57               | 1.98               | <b>1.65</b>        | 4.12               | 1.57               | <b>1.33</b>        | 3.52               | 1.26               |
| sk_rrSVD_006   | <b>2.03</b>        | 6.29               | 1.89               | <b>1.56</b>        | 4.17               | 1.49               | <b>1.24</b>        | 3.51               | 1.17               |
| sk_rrSVD_007   | <b>1.97</b>        | 5.98               | 1.84               | <b>1.47</b>        | 3.96               | 1.39               | <b>1.16</b>        | 2.99               | 1.11               |
| sk_rrSVD_008   | <b>1.91</b>        | 6.37               | 1.78               | <b>1.42</b>        | 3.66               | 1.35               | <b>1.11</b>        | 3.06               | 1.05               |
| sk_rrSVD_009   | <b>1.86</b>        | 6.26               | 1.76               | <b>1.37</b>        | 3.66               | 1.26               | <b>1.06</b>        | 2.92               | 0.99               |
| sk_rrSVD_010   | <b>1.82</b>        | 6.07               | 1.71               | <b>1.33</b>        | 3.64               | 1.23               | <b>1.02</b>        | 2.81               | 0.96               |

**Table S28.** Normalized RMSE mean, standard deviation and best result for Au<sub>38</sub>Q  $K = 30$ . Bolded means  $\bar{x}$  differ statistically from *Cholesky decomposition*.

| Dataset        | AuN2-4k            |                    |                    | AuN2-8k            |                    |                    | AuN2-12k           |                    |                    |
|----------------|--------------------|--------------------|--------------------|--------------------|--------------------|--------------------|--------------------|--------------------|--------------------|
|                | $\bar{x}$          | $\sigma$           | min(x)             | $\bar{x}$          | $\sigma$           | min(x)             | $\bar{x}$          | $\sigma$           | min(x)             |
| Method / coef. | $1 \times 10^{-2}$ | $1 \times 10^{-3}$ | $1 \times 10^{-2}$ | $1 \times 10^{-2}$ | $1 \times 10^{-4}$ | $1 \times 10^{-2}$ | $1 \times 10^{-2}$ | $1 \times 10^{-4}$ | $1 \times 10^{-2}$ |
| cho_dec        | 2.17               | 0.93               | 1.99               | 1.4                | 4.73               | 1.29               | 1.02               | 3.4                | 0.94               |
| sk_rrSVD_001   | <b>5.2</b>         | 1.97               | 4.73               | <b>4.4</b>         | 8.09               | 4.27               | <b>3.88</b>        | 8.11               | 3.7                |
| sk_rrSVD_002   | <b>4.46</b>        | 1.33               | 4.14               | <b>3.62</b>        | 6.94               | 3.52               | <b>2.99</b>        | 8.03               | 2.78               |
| sk_rrSVD_003   | <b>4.06</b>        | 1.43               | 3.74               | <b>3.11</b>        | 7.1                | 2.97               | <b>2.42</b>        | 6.16               | 2.32               |
| sk_rrSVD_004   | <b>3.74</b>        | 1.18               | 3.51               | <b>2.71</b>        | 6.88               | 2.54               | <b>2.09</b>        | 5.49               | 1.96               |
| sk_rrSVD_005   | <b>3.52</b>        | 1.16               | 3.26               | <b>2.44</b>        | 5.66               | 2.33               | <b>1.87</b>        | 5.13               | 1.76               |
| sk_rrSVD_006   | <b>3.32</b>        | 1.12               | 3.11               | <b>2.28</b>        | 5.73               | 2.15               | <b>1.7</b>         | 4.22               | 1.6                |
| sk_rrSVD_007   | <b>3.12</b>        | 1.19               | 2.83               | <b>2.13</b>        | 5.24               | 2.00               | <b>1.56</b>        | 4.36               | 1.48               |
| sk_rrSVD_008   | <b>2.97</b>        | 1.16               | 2.7                | <b>2.02</b>        | 3.98               | 1.93               | <b>1.46</b>        | 3.58               | 1.39               |
| sk_rrSVD_009   | <b>2.85</b>        | 1.14               | 2.6                | <b>1.92</b>        | 5.27               | 1.8                | <b>1.39</b>        | 3.31               | 1.33               |
| sk_rrSVD_010   | <b>2.74</b>        | 1.08               | 2.48               | <b>1.84</b>        | 4.75               | 1.74               | <b>1.33</b>        | 3.51               | 1.26               |

  

| Dataset        | AuN10-4k           |                    |                    | AuN10-8k           |                    |                    | AuN10-12k          |                    |                    |
|----------------|--------------------|--------------------|--------------------|--------------------|--------------------|--------------------|--------------------|--------------------|--------------------|
|                | $\bar{x}$          | $\sigma$           | min(x)             | $\bar{x}$          | $\sigma$           | min(x)             | $\bar{x}$          | $\sigma$           | min(x)             |
| Method / coef. | $1 \times 10^{-2}$ | $1 \times 10^{-4}$ | $1 \times 10^{-2}$ | $1 \times 10^{-2}$ | $1 \times 10^{-4}$ | $1 \times 10^{-2}$ | $1 \times 10^{-2}$ | $1 \times 10^{-4}$ | $1 \times 10^{-2}$ |
| cho_dec        | 1.42               | 4.34               | 1.34               | 0.96               | 2.91               | 0.9                | 0.72               | 1.66               | 0.68               |
| sk_rrSVD_001   | <b>2.86</b>        | 9.84               | 2.67               | <b>2.43</b>        | 4.53               | 2.35               | <b>2.14</b>        | 3.99               | 2.05               |
| sk_rrSVD_002   | <b>2.52</b>        | 7.88               | 2.4                | <b>2.06</b>        | 4.6                | 1.96               | <b>1.76</b>        | 3.01               | 1.7                |
| sk_rrSVD_003   | <b>2.31</b>        | 6.66               | 2.19               | <b>1.87</b>        | 4.31               | 1.79               | <b>1.57</b>        | 2.67               | 1.51               |
| sk_rrSVD_004   | <b>2.17</b>        | 6.33               | 2.07               | <b>1.74</b>        | 4.14               | 1.64               | <b>1.43</b>        | 2.81               | 1.37               |
| sk_rrSVD_005   | <b>2.06</b>        | 6.52               | 1.96               | <b>1.62</b>        | 3.25               | 1.53               | <b>1.32</b>        | 2.57               | 1.25               |
| sk_rrSVD_006   | <b>1.99</b>        | 5.95               | 1.89               | <b>1.52</b>        | 3.2                | 1.45               | <b>1.22</b>        | 2.68               | 1.13               |
| sk_rrSVD_007   | <b>1.92</b>        | 6.79               | 1.82               | <b>1.44</b>        | 2.51               | 1.37               | <b>1.14</b>        | 2.21               | 1.06               |
| sk_rrSVD_008   | <b>1.87</b>        | 6.31               | 1.74               | <b>1.37</b>        | 2.76               | 1.31               | <b>1.08</b>        | 2.23               | 1.02               |
| sk_rrSVD_009   | <b>1.81</b>        | 5.81               | 1.68               | <b>1.31</b>        | 2.33               | 1.26               | <b>1.02</b>        | 1.93               | 0.96               |
| sk_rrSVD_010   | <b>1.76</b>        | 6.23               | 1.65               | <b>1.27</b>        | 2.23               | 1.22               | <b>0.97</b>        | 1.75               | 0.92               |

  

| Dataset        | AuN100-4k          |                    |                    | AuN100-8k          |                    |                    | AuN100-12k         |                    |                    |
|----------------|--------------------|--------------------|--------------------|--------------------|--------------------|--------------------|--------------------|--------------------|--------------------|
|                | $\bar{x}$          | $\sigma$           | min(x)             | $\bar{x}$          | $\sigma$           | min(x)             | $\bar{x}$          | $\sigma$           | min(x)             |
| Method / coef. | $1 \times 10^{-2}$ | $1 \times 10^{-4}$ | $1 \times 10^{-2}$ | $1 \times 10^{-2}$ | $1 \times 10^{-4}$ | $1 \times 10^{-2}$ | $1 \times 10^{-2}$ | $1 \times 10^{-4}$ | $1 \times 10^{-2}$ |
| cho_dec        | 1.43               | 5.27               | 1.34               | 0.96               | 2.64               | 0.88               | 0.72               | 2.16               | 0.68               |
| sk_rrSVD_001   | <b>2.9</b>         | 7.49               | 2.69               | <b>2.46</b>        | 5.57               | 2.34               | <b>2.14</b>        | 4.28               | 2.05               |
| sk_rrSVD_002   | <b>2.54</b>        | 7.74               | 2.38               | <b>2.07</b>        | 4.5                | 2.00               | <b>1.74</b>        | 3.66               | 1.69               |
| sk_rrSVD_003   | <b>2.3</b>         | 6.01               | 2.21               | <b>1.88</b>        | 3.41               | 1.81               | <b>1.55</b>        | 3.11               | 1.49               |
| sk_rrSVD_004   | <b>2.16</b>        | 5.44               | 2.04               | <b>1.74</b>        | 3.58               | 1.66               | <b>1.42</b>        | 3.31               | 1.36               |
| sk_rrSVD_005   | <b>2.07</b>        | 5.31               | 1.97               | <b>1.63</b>        | 3.27               | 1.56               | <b>1.31</b>        | 3.03               | 1.24               |
| sk_rrSVD_006   | <b>2.00</b>        | 4.8                | 1.91               | <b>1.53</b>        | 2.8                | 1.48               | <b>1.21</b>        | 2.93               | 1.15               |
| sk_rrSVD_007   | <b>1.93</b>        | 4.97               | 1.85               | <b>1.44</b>        | 3.24               | 1.39               | <b>1.13</b>        | 2.47               | 1.09               |
| sk_rrSVD_008   | <b>1.87</b>        | 5.68               | 1.77               | <b>1.38</b>        | 2.92               | 1.32               | <b>1.07</b>        | 2.39               | 1.02               |
| sk_rrSVD_009   | <b>1.82</b>        | 5.62               | 1.73               | <b>1.32</b>        | 2.46               | 1.26               | <b>1.01</b>        | 2.34               | 0.96               |
| sk_rrSVD_010   | <b>1.77</b>        | 5.66               | 1.68               | <b>1.27</b>        | 2.46               | 1.22               | <b>0.96</b>        | 2.37               | 0.9                |

**Table S29.** Normalized RMSE mean, standard deviation and best result for Au<sub>38</sub>Q  $K = 40$ . Bolded means  $\bar{x}$  differ statistically from *Cholesky decomposition*.

| Dataset        | AuN2-4k            |                    |                    | AuN2-8k            |                    |                    | AuN2-12k           |                    |                    |
|----------------|--------------------|--------------------|--------------------|--------------------|--------------------|--------------------|--------------------|--------------------|--------------------|
|                | $\bar{x}$          | $\sigma$           | min(x)             | $\bar{x}$          | $\sigma$           | min(x)             | $\bar{x}$          | $\sigma$           | min(x)             |
| Method / coef. | $1 \times 10^{-2}$ | $1 \times 10^{-3}$ | $1 \times 10^{-2}$ | $1 \times 10^{-2}$ | $1 \times 10^{-4}$ | $1 \times 10^{-2}$ | $1 \times 10^{-2}$ | $1 \times 10^{-4}$ | $1 \times 10^{-2}$ |
| cho_dec        | 1.95               | 0.82               | 1.78               | 1.21               | 3.67               | 1.14               | 0.88               | 2.4                | 0.83               |
| sk_rrSVD_001   | <b>5.19</b>        | 1.74               | 4.76               | <b>4.4</b>         | 7.99               | 4.24               | <b>3.87</b>        | 8.84               | 3.69               |
| sk_rrSVD_002   | <b>4.45</b>        | 1.23               | 4.2                | <b>3.62</b>        | 6.91               | 3.49               | <b>2.96</b>        | 6.92               | 2.81               |
| sk_rrSVD_003   | <b>4.04</b>        | 1.33               | 3.71               | <b>3.08</b>        | 6.85               | 2.94               | <b>2.41</b>        | 5.83               | 2.24               |
| sk_rrSVD_004   | <b>3.72</b>        | 1.24               | 3.5                | <b>2.68</b>        | 7.86               | 2.51               | <b>2.06</b>        | 4.71               | 1.96               |
| sk_rrSVD_005   | <b>3.49</b>        | 1.08               | 3.23               | <b>2.42</b>        | 6.03               | 2.32               | <b>1.84</b>        | 4.66               | 1.73               |
| sk_rrSVD_006   | <b>3.28</b>        | 1.19               | 3.04               | <b>2.23</b>        | 5.36               | 2.1                | <b>1.66</b>        | 3.92               | 1.59               |
| sk_rrSVD_007   | <b>3.07</b>        | 1.17               | 2.77               | <b>2.09</b>        | 4.33               | 2.01               | <b>1.53</b>        | 3.74               | 1.44               |
| sk_rrSVD_008   | <b>2.92</b>        | 1.11               | 2.66               | <b>1.97</b>        | 4.68               | 1.84               | <b>1.43</b>        | 3.41               | 1.38               |
| sk_rrSVD_009   | <b>2.8</b>         | 1.05               | 2.57               | <b>1.87</b>        | 4.57               | 1.78               | <b>1.35</b>        | 2.95               | 1.3                |
| sk_rrSVD_010   | <b>2.69</b>        | 1.07               | 2.44               | <b>1.79</b>        | 5.00               | 1.69               | <b>1.28</b>        | 2.86               | 1.23               |

  

| Dataset        | AuN10-4k           |                    |                    | AuN10-8k           |                    |                    | AuN10-12k          |                    |                    |
|----------------|--------------------|--------------------|--------------------|--------------------|--------------------|--------------------|--------------------|--------------------|--------------------|
|                | $\bar{x}$          | $\sigma$           | min(x)             | $\bar{x}$          | $\sigma$           | min(x)             | $\bar{x}$          | $\sigma$           | min(x)             |
| Method / coef. | $1 \times 10^{-2}$ | $1 \times 10^{-4}$ | $1 \times 10^{-2}$ | $1 \times 10^{-2}$ | $1 \times 10^{-4}$ | $1 \times 10^{-2}$ | $1 \times 10^{-2}$ | $1 \times 10^{-4}$ | $1 \times 10^{-2}$ |
| cho_dec        | 1.3                | 4.45               | 1.22               | 0.85               | 2.54               | 0.8                | 0.64               | 1.47               | 0.61               |
| sk_rrSVD_001   | <b>2.85</b>        | 8.26               | 2.69               | <b>2.42</b>        | 4.43               | 2.33               | <b>2.13</b>        | 3.82               | 2.07               |
| sk_rrSVD_002   | <b>2.52</b>        | 7.51               | 2.38               | <b>2.05</b>        | 4.51               | 1.96               | <b>1.76</b>        | 3.09               | 1.7                |
| sk_rrSVD_003   | <b>2.3</b>         | 5.88               | 2.19               | <b>1.87</b>        | 3.93               | 1.79               | <b>1.56</b>        | 2.47               | 1.5                |
| sk_rrSVD_004   | <b>2.14</b>        | 5.18               | 2.06               | <b>1.73</b>        | 3.54               | 1.62               | <b>1.43</b>        | 2.43               | 1.38               |
| sk_rrSVD_005   | <b>2.05</b>        | 5.75               | 1.94               | <b>1.61</b>        | 3.18               | 1.55               | <b>1.31</b>        | 2.71               | 1.25               |
| sk_rrSVD_006   | <b>1.97</b>        | 5.65               | 1.87               | <b>1.51</b>        | 3.49               | 1.43               | <b>1.2</b>         | 2.37               | 1.15               |
| sk_rrSVD_007   | <b>1.91</b>        | 5.39               | 1.81               | <b>1.42</b>        | 3.08               | 1.36               | <b>1.13</b>        | 1.99               | 1.07               |
| sk_rrSVD_008   | <b>1.85</b>        | 5.88               | 1.69               | <b>1.35</b>        | 2.55               | 1.31               | <b>1.06</b>        | 1.88               | 1.01               |
| sk_rrSVD_009   | <b>1.79</b>        | 5.61               | 1.68               | <b>1.29</b>        | 2.23               | 1.26               | <b>1.00</b>        | 2.02               | 0.96               |
| sk_rrSVD_010   | <b>1.74</b>        | 5.71               | 1.62               | <b>1.25</b>        | 2.2                | 1.2                | <b>0.95</b>        | 2.01               | 0.91               |

  

| Dataset        | AuN100-4k          |                    |                    | AuN100-8k          |                    |                    | AuN100-12k         |                    |                    |
|----------------|--------------------|--------------------|--------------------|--------------------|--------------------|--------------------|--------------------|--------------------|--------------------|
|                | $\bar{x}$          | $\sigma$           | min(x)             | $\bar{x}$          | $\sigma$           | min(x)             | $\bar{x}$          | $\sigma$           | min(x)             |
| Method / coef. | $1 \times 10^{-2}$ | $1 \times 10^{-4}$ | $1 \times 10^{-2}$ | $1 \times 10^{-2}$ | $1 \times 10^{-4}$ | $1 \times 10^{-2}$ | $1 \times 10^{-2}$ | $1 \times 10^{-4}$ | $1 \times 10^{-2}$ |
| cho_dec        | 1.3                | 4.35               | 1.23               | 0.85               | 2.24               | 0.79               | 0.63               | 1.78               | 0.59               |
| sk_rrSVD_001   | <b>2.88</b>        | 7.24               | 2.72               | <b>2.46</b>        | 6.01               | 2.33               | <b>2.14</b>        | 4.46               | 2.05               |
| sk_rrSVD_002   | <b>2.53</b>        | 6.57               | 2.41               | <b>2.05</b>        | 4.89               | 1.93               | <b>1.75</b>        | 3.3                | 1.69               |
| sk_rrSVD_003   | <b>2.29</b>        | 6.05               | 2.17               | <b>1.87</b>        | 4.29               | 1.81               | <b>1.54</b>        | 3.47               | 1.47               |
| sk_rrSVD_004   | <b>2.15</b>        | 5.5                | 2.03               | <b>1.74</b>        | 3.7                | 1.67               | <b>1.42</b>        | 2.85               | 1.35               |
| sk_rrSVD_005   | <b>2.05</b>        | 5.55               | 1.96               | <b>1.61</b>        | 3.35               | 1.56               | <b>1.3</b>         | 2.78               | 1.22               |
| sk_rrSVD_006   | <b>1.99</b>        | 4.88               | 1.91               | <b>1.51</b>        | 2.87               | 1.45               | <b>1.2</b>         | 2.41               | 1.15               |
| sk_rrSVD_007   | <b>1.92</b>        | 4.89               | 1.84               | <b>1.42</b>        | 3.27               | 1.37               | <b>1.12</b>        | 2.23               | 1.07               |
| sk_rrSVD_008   | <b>1.85</b>        | 5.35               | 1.76               | <b>1.36</b>        | 2.75               | 1.32               | <b>1.05</b>        | 2.31               | 1.01               |
| sk_rrSVD_009   | <b>1.79</b>        | 5.2                | 1.71               | <b>1.3</b>         | 2.6                | 1.26               | <b>0.99</b>        | 2.26               | 0.95               |
| sk_rrSVD_010   | <b>1.75</b>        | 5.11               | 1.67               | <b>1.25</b>        | 2.68               | 1.2                | <b>0.94</b>        | 2.24               | 0.9                |

**Table S30.** Normalized RMSE mean, standard deviation and best result for Au<sub>38</sub>Q  $K = 50$ . Bolded means  $\bar{x}$  differ statistically from *Cholesky decomposition*.

| Dataset        | AuN2-4k            |                    |                    | AuN2-8k            |                    |                    | AuN2-12k           |                    |                    |
|----------------|--------------------|--------------------|--------------------|--------------------|--------------------|--------------------|--------------------|--------------------|--------------------|
|                | $\bar{x}$          | $\sigma$           | min(x)             | $\bar{x}$          | $\sigma$           | min(x)             | $\bar{x}$          | $\sigma$           | min(x)             |
| Method / coef. | $1 \times 10^{-2}$ | $1 \times 10^{-3}$ | $1 \times 10^{-2}$ | $1 \times 10^{-2}$ | $1 \times 10^{-4}$ | $1 \times 10^{-2}$ | $1 \times 10^{-2}$ | $1 \times 10^{-4}$ | $1 \times 10^{-2}$ |
| cho_dec        | 1.79               | 0.71               | 1.67               | 1.09               | 3.2                | 1.04               | 0.8                | 2.07               | 0.76               |
| sk_rrSVD_001   | <b>5.18</b>        | 1.71               | 4.76               | <b>4.38</b>        | 7.36               | 4.2                | <b>3.87</b>        | 7.28               | 3.71               |
| sk_rrSVD_002   | <b>4.43</b>        | 1.44               | 4.1                | <b>3.61</b>        | 6.63               | 3.49               | <b>2.96</b>        | 7.24               | 2.81               |
| sk_rrSVD_003   | <b>4.02</b>        | 1.32               | 3.67               | <b>3.07</b>        | 6.98               | 2.94               | <b>2.4</b>         | 5.94               | 2.26               |
| sk_rrSVD_004   | <b>3.71</b>        | 1.32               | 3.46               | <b>2.66</b>        | 6.07               | 2.5                | <b>2.05</b>        | 4.3                | 1.93               |
| sk_rrSVD_005   | <b>3.47</b>        | 1.17               | 3.18               | <b>2.4</b>         | 6.05               | 2.25               | <b>1.82</b>        | 3.95               | 1.75               |
| sk_rrSVD_006   | <b>3.26</b>        | 1.23               | 2.95               | <b>2.21</b>        | 5.64               | 2.06               | <b>1.64</b>        | 3.14               | 1.59               |
| sk_rrSVD_007   | <b>3.07</b>        | 1.11               | 2.78               | <b>2.07</b>        | 4.45               | 1.96               | <b>1.51</b>        | 3.05               | 1.44               |
| sk_rrSVD_008   | <b>2.9</b>         | 1.07               | 2.6                | <b>1.96</b>        | 3.81               | 1.87               | <b>1.41</b>        | 2.67               | 1.34               |
| sk_rrSVD_009   | <b>2.76</b>        | 0.99               | 2.53               | <b>1.84</b>        | 3.96               | 1.76               | <b>1.32</b>        | 2.56               | 1.27               |
| sk_rrSVD_010   | <b>2.65</b>        | 1.02               | 2.39               | <b>1.76</b>        | 3.68               | 1.66               | <b>1.26</b>        | 2.71               | 1.21               |

  

| Dataset        | AuN10-4k           |                    |                    | AuN10-8k           |                    |                    | AuN10-12k          |                    |                    |
|----------------|--------------------|--------------------|--------------------|--------------------|--------------------|--------------------|--------------------|--------------------|--------------------|
|                | $\bar{x}$          | $\sigma$           | min(x)             | $\bar{x}$          | $\sigma$           | min(x)             | $\bar{x}$          | $\sigma$           | min(x)             |
| Method / coef. | $1 \times 10^{-2}$ | $1 \times 10^{-4}$ | $1 \times 10^{-2}$ | $1 \times 10^{-2}$ | $1 \times 10^{-4}$ | $1 \times 10^{-2}$ | $1 \times 10^{-2}$ | $1 \times 10^{-4}$ | $1 \times 10^{-2}$ |
| cho_dec        | 1.21               | 4.34               | 1.11               | 0.78               | 2.14               | 0.75               | 0.6                | 1.29               | 0.58               |
| sk_rrSVD_001   | <b>2.83</b>        | 7.67               | 2.68               | <b>2.42</b>        | 4.46               | 2.32               | <b>2.14</b>        | 3.76               | 2.06               |
| sk_rrSVD_002   | <b>2.52</b>        | 6.51               | 2.37               | <b>2.05</b>        | 4.92               | 1.96               | <b>1.75</b>        | 3.18               | 1.7                |
| sk_rrSVD_003   | <b>2.28</b>        | 6.11               | 2.18               | <b>1.87</b>        | 3.94               | 1.79               | <b>1.56</b>        | 2.55               | 1.5                |
| sk_rrSVD_004   | <b>2.14</b>        | 5.36               | 2.05               | <b>1.73</b>        | 3.71               | 1.64               | <b>1.42</b>        | 2.08               | 1.38               |
| sk_rrSVD_005   | <b>2.04</b>        | 4.99               | 1.93               | <b>1.61</b>        | 2.88               | 1.54               | <b>1.3</b>         | 2.62               | 1.24               |
| sk_rrSVD_006   | <b>1.97</b>        | 5.46               | 1.86               | <b>1.5</b>         | 3.25               | 1.43               | <b>1.2</b>         | 2.55               | 1.14               |
| sk_rrSVD_007   | <b>1.9</b>         | 5.4                | 1.78               | <b>1.41</b>        | 2.84               | 1.35               | <b>1.11</b>        | 2.11               | 1.07               |
| sk_rrSVD_008   | <b>1.84</b>        | 5.65               | 1.73               | <b>1.34</b>        | 2.52               | 1.29               | <b>1.05</b>        | 2.07               | 1.00               |
| sk_rrSVD_009   | <b>1.77</b>        | 5.64               | 1.65               | <b>1.28</b>        | 2.07               | 1.24               | <b>0.99</b>        | 2.28               | 0.93               |
| sk_rrSVD_010   | <b>1.72</b>        | 4.93               | 1.62               | <b>1.23</b>        | 1.93               | 1.19               | <b>0.94</b>        | 1.89               | 0.9                |

  

| Dataset        | AuN100-4k          |                    |                    | AuN100-8k          |                    |                    | AuN100-12k         |                    |                    |
|----------------|--------------------|--------------------|--------------------|--------------------|--------------------|--------------------|--------------------|--------------------|--------------------|
|                | $\bar{x}$          | $\sigma$           | min(x)             | $\bar{x}$          | $\sigma$           | min(x)             | $\bar{x}$          | $\sigma$           | min(x)             |
| Method / coef. | $1 \times 10^{-2}$ | $1 \times 10^{-4}$ | $1 \times 10^{-2}$ | $1 \times 10^{-2}$ | $1 \times 10^{-4}$ | $1 \times 10^{-2}$ | $1 \times 10^{-2}$ | $1 \times 10^{-4}$ | $1 \times 10^{-2}$ |
| cho_dec        | 1.21               | 3.84               | 1.15               | 0.79               | 2.26               | 0.73               | 0.58               | 1.61               | 0.54               |
| sk_rrSVD_001   | <b>2.89</b>        | 8.37               | 2.71               | <b>2.45</b>        | 5.12               | 2.36               | <b>2.14</b>        | 3.78               | 2.06               |
| sk_rrSVD_002   | <b>2.52</b>        | 6.48               | 2.4                | <b>2.05</b>        | 5.03               | 1.95               | <b>1.74</b>        | 2.83               | 1.69               |
| sk_rrSVD_003   | <b>2.29</b>        | 6.04               | 2.13               | <b>1.86</b>        | 3.93               | 1.8                | <b>1.54</b>        | 3.08               | 1.48               |
| sk_rrSVD_004   | <b>2.14</b>        | 4.69               | 2.03               | <b>1.72</b>        | 3.86               | 1.64               | <b>1.42</b>        | 2.69               | 1.37               |
| sk_rrSVD_005   | <b>2.05</b>        | 5.29               | 1.96               | <b>1.61</b>        | 3.79               | 1.56               | <b>1.3</b>         | 2.39               | 1.25               |
| sk_rrSVD_006   | <b>1.97</b>        | 4.54               | 1.88               | <b>1.51</b>        | 3.01               | 1.45               | <b>1.19</b>        | 2.6                | 1.14               |
| sk_rrSVD_007   | <b>1.91</b>        | 5.09               | 1.79               | <b>1.42</b>        | 3.07               | 1.35               | <b>1.11</b>        | 2.14               | 1.06               |
| sk_rrSVD_008   | <b>1.85</b>        | 4.62               | 1.75               | <b>1.34</b>        | 2.83               | 1.3                | <b>1.05</b>        | 2.15               | 1.00               |
| sk_rrSVD_009   | <b>1.78</b>        | 4.41               | 1.71               | <b>1.28</b>        | 2.81               | 1.22               | <b>0.99</b>        | 2.13               | 0.94               |
| sk_rrSVD_010   | <b>1.73</b>        | 4.86               | 1.66               | <b>1.23</b>        | 2.53               | 1.19               | <b>0.93</b>        | 2.11               | 0.89               |

**Table S31.** Normalized RMSE mean, standard deviation and best result for Au<sub>38</sub>Q  $K = 60$ . Bolded means  $\bar{x}$  differ statistically from *Cholesky decomposition*.

| Dataset        | AuN2-4k            |                    |                    | AuN2-8k            |                    |                    | AuN2-12k           |                    |                    |
|----------------|--------------------|--------------------|--------------------|--------------------|--------------------|--------------------|--------------------|--------------------|--------------------|
|                | $\bar{x}$          | $\sigma$           | min(x)             | $\bar{x}$          | $\sigma$           | min(x)             | $\bar{x}$          | $\sigma$           | min(x)             |
| Method / coef. | $1 \times 10^{-2}$ | $1 \times 10^{-3}$ | $1 \times 10^{-2}$ | $1 \times 10^{-2}$ | $1 \times 10^{-4}$ | $1 \times 10^{-2}$ | $1 \times 10^{-2}$ | $1 \times 10^{-4}$ | $1 \times 10^{-2}$ |
| cho_dec        | 1.68               | 0.66               | 1.58               | 1.01               | 3.07               | 0.96               | 0.74               | 2.11               | 0.69               |
| sk_rrSVD_001   | <b>5.17</b>        | 1.62               | 4.73               | <b>4.39</b>        | 7.84               | 4.26               | <b>3.87</b>        | 7.33               | 3.72               |
| sk_rrSVD_002   | <b>4.43</b>        | 1.33               | 4.04               | <b>3.61</b>        | 6.4                | 3.49               | <b>2.94</b>        | 6.38               | 2.81               |
| sk_rrSVD_003   | <b>4.02</b>        | 1.21               | 3.71               | <b>3.07</b>        | 5.83               | 2.97               | <b>2.4</b>         | 5.35               | 2.27               |
| sk_rrSVD_004   | <b>3.7</b>         | 1.31               | 3.45               | <b>2.66</b>        | 6.09               | 2.52               | <b>2.04</b>        | 3.77               | 1.92               |
| sk_rrSVD_005   | <b>3.46</b>        | 1.12               | 3.25               | <b>2.38</b>        | 5.71               | 2.23               | <b>1.8</b>         | 4.23               | 1.71               |
| sk_rrSVD_006   | <b>3.25</b>        | 1.22               | 2.96               | <b>2.2</b>         | 5.9                | 2.03               | <b>1.64</b>        | 3.53               | 1.55               |
| sk_rrSVD_007   | <b>3.03</b>        | 1.13               | 2.77               | <b>2.05</b>        | 5.05               | 1.91               | <b>1.5</b>         | 3.19               | 1.43               |
| sk_rrSVD_008   | <b>2.88</b>        | 1.15               | 2.57               | <b>1.94</b>        | 4.41               | 1.86               | <b>1.39</b>        | 2.52               | 1.34               |
| sk_rrSVD_009   | <b>2.74</b>        | 0.99               | 2.48               | <b>1.83</b>        | 3.47               | 1.75               | <b>1.31</b>        | 2.49               | 1.25               |
| sk_rrSVD_010   | <b>2.62</b>        | 1.01               | 2.41               | <b>1.74</b>        | 3.86               | 1.64               | <b>1.25</b>        | 2.59               | 1.19               |

  

| Dataset        | AuN10-4k           |                    |                    | AuN10-8k           |                    |                    | AuN10-12k          |                    |                    |
|----------------|--------------------|--------------------|--------------------|--------------------|--------------------|--------------------|--------------------|--------------------|--------------------|
|                | $\bar{x}$          | $\sigma$           | min(x)             | $\bar{x}$          | $\sigma$           | min(x)             | $\bar{x}$          | $\sigma$           | min(x)             |
| Method / coef. | $1 \times 10^{-2}$ | $1 \times 10^{-4}$ | $1 \times 10^{-2}$ | $1 \times 10^{-2}$ | $1 \times 10^{-4}$ | $1 \times 10^{-2}$ | $1 \times 10^{-2}$ | $1 \times 10^{-4}$ | $1 \times 10^{-2}$ |
| cho_dec        | 1.14               | 3.46               | 1.07               | 0.74               | 1.86               | 0.71               | 0.57               | 1.23               | 0.54               |
| sk_rrSVD_001   | <b>2.83</b>        | 7.82               | 2.68               | <b>2.42</b>        | 4.34               | 2.32               | <b>2.13</b>        | 3.76               | 2.07               |
| sk_rrSVD_002   | <b>2.51</b>        | 6.65               | 2.36               | <b>2.06</b>        | 4.72               | 1.97               | <b>1.75</b>        | 2.99               | 1.69               |
| sk_rrSVD_003   | <b>2.28</b>        | 6.00               | 2.16               | <b>1.87</b>        | 4.07               | 1.79               | <b>1.55</b>        | 2.17               | 1.51               |
| sk_rrSVD_004   | <b>2.13</b>        | 5.3                | 2.02               | <b>1.72</b>        | 3.69               | 1.65               | <b>1.42</b>        | 2.36               | 1.37               |
| sk_rrSVD_005   | <b>2.03</b>        | 4.93               | 1.94               | <b>1.6</b>         | 3.12               | 1.53               | <b>1.3</b>         | 2.3                | 1.26               |
| sk_rrSVD_006   | <b>1.97</b>        | 5.13               | 1.86               | <b>1.5</b>         | 3.37               | 1.43               | <b>1.19</b>        | 2.32               | 1.15               |
| sk_rrSVD_007   | <b>1.89</b>        | 5.66               | 1.79               | <b>1.41</b>        | 2.81               | 1.36               | <b>1.11</b>        | 1.76               | 1.07               |
| sk_rrSVD_008   | <b>1.84</b>        | 5.34               | 1.74               | <b>1.33</b>        | 2.55               | 1.28               | <b>1.04</b>        | 1.97               | 0.99               |
| sk_rrSVD_009   | <b>1.77</b>        | 5.35               | 1.66               | <b>1.28</b>        | 2.34               | 1.24               | <b>0.98</b>        | 1.88               | 0.94               |
| sk_rrSVD_010   | <b>1.71</b>        | 5.17               | 1.62               | <b>1.22</b>        | 2.15               | 1.17               | <b>0.93</b>        | 1.89               | 0.9                |

  

| Dataset        | AuN100-4k          |                    |                    | AuN100-8k          |                    |                    | AuN100-12k         |                    |                    |
|----------------|--------------------|--------------------|--------------------|--------------------|--------------------|--------------------|--------------------|--------------------|--------------------|
|                | $\bar{x}$          | $\sigma$           | min(x)             | $\bar{x}$          | $\sigma$           | min(x)             | $\bar{x}$          | $\sigma$           | min(x)             |
| Method / coef. | $1 \times 10^{-2}$ | $1 \times 10^{-4}$ | $1 \times 10^{-2}$ | $1 \times 10^{-2}$ | $1 \times 10^{-4}$ | $1 \times 10^{-2}$ | $1 \times 10^{-2}$ | $1 \times 10^{-4}$ | $1 \times 10^{-2}$ |
| cho_dec        | 1.14               | 3.46               | 1.08               | 0.74               | 2.1                | 0.69               | 0.55               | 1.6                | 0.51               |
| sk_rrSVD_001   | <b>2.87</b>        | 8.7                | 2.72               | <b>2.45</b>        | 4.57               | 2.37               | <b>2.13</b>        | 3.58               | 2.06               |
| sk_rrSVD_002   | <b>2.51</b>        | 5.35               | 2.43               | <b>2.04</b>        | 4.53               | 1.96               | <b>1.74</b>        | 2.89               | 1.68               |
| sk_rrSVD_003   | <b>2.28</b>        | 5.66               | 2.14               | <b>1.86</b>        | 3.95               | 1.79               | <b>1.54</b>        | 3.37               | 1.47               |
| sk_rrSVD_004   | <b>2.14</b>        | 4.56               | 2.04               | <b>1.73</b>        | 3.46               | 1.65               | <b>1.41</b>        | 2.58               | 1.35               |
| sk_rrSVD_005   | <b>2.05</b>        | 5.28               | 1.94               | <b>1.6</b>         | 3.38               | 1.54               | <b>1.29</b>        | 2.5                | 1.24               |
| sk_rrSVD_006   | <b>1.97</b>        | 5.24               | 1.89               | <b>1.5</b>         | 2.73               | 1.45               | <b>1.18</b>        | 2.21               | 1.14               |
| sk_rrSVD_007   | <b>1.91</b>        | 4.62               | 1.82               | <b>1.41</b>        | 3.08               | 1.36               | <b>1.1</b>         | 2.13               | 1.06               |
| sk_rrSVD_008   | <b>1.84</b>        | 4.31               | 1.75               | <b>1.33</b>        | 2.96               | 1.27               | <b>1.04</b>        | 2.06               | 0.99               |
| sk_rrSVD_009   | <b>1.78</b>        | 4.78               | 1.68               | <b>1.28</b>        | 2.86               | 1.21               | <b>0.98</b>        | 2.14               | 0.94               |
| sk_rrSVD_010   | <b>1.72</b>        | 4.99               | 1.64               | <b>1.22</b>        | 2.53               | 1.17               | <b>0.92</b>        | 1.79               | 0.89               |

**Table S32.** Normalized RMSE mean, standard deviation and best result for Au<sub>38</sub>Q  $K = 70$ . Bolded means  $\bar{x}$  differ statistically from *Cholesky decomposition*.

| Dataset        | AuN2-4k            |                    |                    | AuN2-8k            |                    |                    | AuN2-12k           |                    |                    |
|----------------|--------------------|--------------------|--------------------|--------------------|--------------------|--------------------|--------------------|--------------------|--------------------|
|                | $\bar{x}$          | $\sigma$           | min(x)             | $\bar{x}$          | $\sigma$           | min(x)             | $\bar{x}$          | $\sigma$           | min(x)             |
| Method / coef. | $1 \times 10^{-2}$ | $1 \times 10^{-3}$ | $1 \times 10^{-2}$ | $1 \times 10^{-2}$ | $1 \times 10^{-4}$ | $1 \times 10^{-2}$ | $1 \times 10^{-2}$ | $1 \times 10^{-4}$ | $1 \times 10^{-2}$ |
| cho_dec        | 1.59               | 0.62               | 1.47               | 0.95               | 2.86               | 0.89               | 0.7                | 1.78               | 0.66               |
| sk_rrSVD_001   | <b>5.18</b>        | 1.57               | 4.9                | <b>4.37</b>        | 7.85               | 4.16               | <b>3.86</b>        | 6.43               | 3.71               |
| sk_rrSVD_002   | <b>4.43</b>        | 1.51               | 4.08               | <b>3.6</b>         | 6.61               | 3.41               | <b>2.96</b>        | 7.09               | 2.84               |
| sk_rrSVD_003   | <b>4.03</b>        | 1.17               | 3.79               | <b>3.05</b>        | 7.3                | 2.82               | <b>2.39</b>        | 4.83               | 2.3                |
| sk_rrSVD_004   | <b>3.68</b>        | 1.26               | 3.44               | <b>2.64</b>        | 5.43               | 2.51               | <b>2.03</b>        | 4.5                | 1.91               |
| sk_rrSVD_005   | <b>3.46</b>        | 1.19               | 3.21               | <b>2.37</b>        | 5.49               | 2.25               | <b>1.8</b>         | 3.97               | 1.73               |
| sk_rrSVD_006   | <b>3.24</b>        | 1.23               | 3.00               | <b>2.19</b>        | 5.6                | 2.04               | <b>1.63</b>        | 2.95               | 1.56               |
| sk_rrSVD_007   | <b>3.02</b>        | 1.33               | 2.72               | <b>2.05</b>        | 4.44               | 1.96               | <b>1.49</b>        | 3.1                | 1.42               |
| sk_rrSVD_008   | <b>2.86</b>        | 1.09               | 2.65               | <b>1.92</b>        | 4.02               | 1.82               | <b>1.39</b>        | 2.98               | 1.33               |
| sk_rrSVD_009   | <b>2.72</b>        | 0.99               | 2.53               | <b>1.81</b>        | 3.63               | 1.73               | <b>1.3</b>         | 2.31               | 1.25               |
| sk_rrSVD_010   | <b>2.61</b>        | 0.96               | 2.41               | <b>1.73</b>        | 3.72               | 1.65               | <b>1.24</b>        | 2.74               | 1.18               |

  

| Dataset        | AuN10-4k           |                    |                    | AuN10-8k           |                    |                    | AuN10-12k          |                    |                    |
|----------------|--------------------|--------------------|--------------------|--------------------|--------------------|--------------------|--------------------|--------------------|--------------------|
|                | $\bar{x}$          | $\sigma$           | min(x)             | $\bar{x}$          | $\sigma$           | min(x)             | $\bar{x}$          | $\sigma$           | min(x)             |
| Method / coef. | $1 \times 10^{-2}$ | $1 \times 10^{-4}$ | $1 \times 10^{-2}$ | $1 \times 10^{-2}$ | $1 \times 10^{-4}$ | $1 \times 10^{-2}$ | $1 \times 10^{-2}$ | $1 \times 10^{-4}$ | $1 \times 10^{-2}$ |
| cho_dec        | 1.09               | 3.5                | 1.03               | 0.71               | 1.78               | 0.68               | 0.55               | 1.05               | 0.53               |
| sk_rrSVD_001   | <b>2.82</b>        | 8.33               | 2.68               | <b>2.42</b>        | 4.25               | 2.34               | <b>2.13</b>        | 3.87               | 2.06               |
| sk_rrSVD_002   | <b>2.51</b>        | 6.51               | 2.4                | <b>2.06</b>        | 4.5                | 1.97               | <b>1.75</b>        | 3.01               | 1.67               |
| sk_rrSVD_003   | <b>2.27</b>        | 5.83               | 2.17               | <b>1.87</b>        | 3.42               | 1.8                | <b>1.55</b>        | 2.35               | 1.5                |
| sk_rrSVD_004   | <b>2.13</b>        | 4.9                | 2.04               | <b>1.72</b>        | 3.49               | 1.66               | <b>1.42</b>        | 2.07               | 1.38               |
| sk_rrSVD_005   | <b>2.04</b>        | 4.92               | 1.95               | <b>1.6</b>         | 3.37               | 1.5                | <b>1.3</b>         | 2.04               | 1.26               |
| sk_rrSVD_006   | <b>1.97</b>        | 5.62               | 1.86               | <b>1.5</b>         | 3.27               | 1.42               | <b>1.19</b>        | 2.13               | 1.14               |
| sk_rrSVD_007   | <b>1.89</b>        | 6.35               | 1.75               | <b>1.4</b>         | 3.12               | 1.33               | <b>1.1</b>         | 1.87               | 1.06               |
| sk_rrSVD_008   | <b>1.83</b>        | 5.33               | 1.72               | <b>1.33</b>        | 2.83               | 1.26               | <b>1.04</b>        | 1.79               | 1.00               |
| sk_rrSVD_009   | <b>1.76</b>        | 5.01               | 1.66               | <b>1.27</b>        | 2.26               | 1.23               | <b>0.98</b>        | 1.75               | 0.95               |
| sk_rrSVD_010   | <b>1.7</b>         | 4.72               | 1.61               | <b>1.22</b>        | 2.06               | 1.18               | <b>0.93</b>        | 1.86               | 0.89               |

  

| Dataset        | AuN100-4k          |                    |                    | AuN100-8k          |                    |                    | AuN100-12k         |                    |                    |
|----------------|--------------------|--------------------|--------------------|--------------------|--------------------|--------------------|--------------------|--------------------|--------------------|
|                | $\bar{x}$          | $\sigma$           | min(x)             | $\bar{x}$          | $\sigma$           | min(x)             | $\bar{x}$          | $\sigma$           | min(x)             |
| Method / coef. | $1 \times 10^{-2}$ | $1 \times 10^{-4}$ | $1 \times 10^{-2}$ | $1 \times 10^{-2}$ | $1 \times 10^{-4}$ | $1 \times 10^{-2}$ | $1 \times 10^{-2}$ | $1 \times 10^{-4}$ | $1 \times 10^{-2}$ |
| cho_dec        | 1.09               | 3.41               | 1.02               | 0.71               | 1.89               | 0.66               | 0.53               | 1.54               | 0.49               |
| sk_rrSVD_001   | <b>2.88</b>        | 7.6                | 2.72               | <b>2.44</b>        | 4.74               | 2.35               | <b>2.13</b>        | 3.58               | 2.07               |
| sk_rrSVD_002   | <b>2.52</b>        | 5.42               | 2.44               | <b>2.04</b>        | 4.18               | 1.97               | <b>1.73</b>        | 2.85               | 1.65               |
| sk_rrSVD_003   | <b>2.27</b>        | 5.46               | 2.15               | <b>1.86</b>        | 3.62               | 1.78               | <b>1.53</b>        | 3.23               | 1.47               |
| sk_rrSVD_004   | <b>2.14</b>        | 5.22               | 2.06               | <b>1.72</b>        | 3.34               | 1.64               | <b>1.41</b>        | 3.03               | 1.34               |
| sk_rrSVD_005   | <b>2.04</b>        | 4.82               | 1.95               | <b>1.6</b>         | 3.18               | 1.54               | <b>1.29</b>        | 2.47               | 1.24               |
| sk_rrSVD_006   | <b>1.97</b>        | 5.2                | 1.88               | <b>1.49</b>        | 2.49               | 1.43               | <b>1.18</b>        | 2.12               | 1.15               |
| sk_rrSVD_007   | <b>1.9</b>         | 4.23               | 1.83               | <b>1.4</b>         | 2.54               | 1.34               | <b>1.1</b>         | 2.06               | 1.05               |
| sk_rrSVD_008   | <b>1.84</b>        | 4.65               | 1.75               | <b>1.33</b>        | 2.76               | 1.27               | <b>1.03</b>        | 2.01               | 0.99               |
| sk_rrSVD_009   | <b>1.77</b>        | 4.27               | 1.7                | <b>1.27</b>        | 2.37               | 1.22               | <b>0.98</b>        | 1.94               | 0.94               |
| sk_rrSVD_010   | <b>1.72</b>        | 4.79               | 1.63               | <b>1.22</b>        | 2.58               | 1.17               | <b>0.92</b>        | 1.85               | 0.88               |

**Table S33.** Normalized RMSE mean, standard deviation and best result for Au<sub>38</sub>Q  $K = 80$ . Bolded means  $\bar{x}$  differ statistically from *Cholesky decomposition*.

| Dataset        | AuN2-4k            |                    |                    | AuN2-8k            |                    |                    | AuN2-12k           |                    |                    |
|----------------|--------------------|--------------------|--------------------|--------------------|--------------------|--------------------|--------------------|--------------------|--------------------|
|                | $\bar{x}$          | $\sigma$           | min(x)             | $\bar{x}$          | $\sigma$           | min(x)             | $\bar{x}$          | $\sigma$           | min(x)             |
| Method / coef. | $1 \times 10^{-2}$ | $1 \times 10^{-3}$ | $1 \times 10^{-2}$ | $1 \times 10^{-2}$ | $1 \times 10^{-4}$ | $1 \times 10^{-2}$ | $1 \times 10^{-2}$ | $1 \times 10^{-4}$ | $1 \times 10^{-2}$ |
| cho_dec        | 1.52               | 0.57               | 1.4                | 0.91               | 2.86               | 0.84               | 0.66               | 1.53               | 0.63               |
| sk_rrSVD_001   | <b>5.18</b>        | 1.76               | 4.83               | <b>4.38</b>        | 5.87               | 4.27               | <b>3.86</b>        | 8.02               | 3.69               |
| sk_rrSVD_002   | <b>4.42</b>        | 1.44               | 4.06               | <b>3.6</b>         | 6.24               | 3.45               | <b>2.96</b>        | 8.79               | 2.73               |
| sk_rrSVD_003   | <b>4.02</b>        | 1.3                | 3.73               | <b>3.04</b>        | 6.04               | 2.87               | <b>2.38</b>        | 4.95               | 2.26               |
| sk_rrSVD_004   | <b>3.68</b>        | 1.22               | 3.41               | <b>2.65</b>        | 6.38               | 2.49               | <b>2.02</b>        | 4.51               | 1.93               |
| sk_rrSVD_005   | <b>3.45</b>        | 1.07               | 3.24               | <b>2.36</b>        | 5.25               | 2.25               | <b>1.79</b>        | 4.21               | 1.72               |
| sk_rrSVD_006   | <b>3.22</b>        | 1.19               | 2.94               | <b>2.18</b>        | 4.75               | 2.03               | <b>1.63</b>        | 3.48               | 1.54               |
| sk_rrSVD_007   | <b>3.01</b>        | 1.2                | 2.69               | <b>2.04</b>        | 4.43               | 1.92               | <b>1.49</b>        | 3.66               | 1.41               |
| sk_rrSVD_008   | <b>2.84</b>        | 1.19               | 2.56               | <b>1.91</b>        | 4.22               | 1.82               | <b>1.38</b>        | 3.14               | 1.3                |
| sk_rrSVD_009   | <b>2.7</b>         | 1.00               | 2.53               | <b>1.81</b>        | 3.7                | 1.72               | <b>1.29</b>        | 2.61               | 1.23               |
| sk_rrSVD_010   | <b>2.6</b>         | 0.89               | 2.39               | <b>1.72</b>        | 3.65               | 1.63               | <b>1.23</b>        | 2.6                | 1.17               |

  

| Dataset        | AuN10-4k           |                    |                    | AuN10-8k           |                    |                    | AuN10-12k          |                    |                    |
|----------------|--------------------|--------------------|--------------------|--------------------|--------------------|--------------------|--------------------|--------------------|--------------------|
|                | $\bar{x}$          | $\sigma$           | min(x)             | $\bar{x}$          | $\sigma$           | min(x)             | $\bar{x}$          | $\sigma$           | min(x)             |
| Method / coef. | $1 \times 10^{-2}$ | $1 \times 10^{-4}$ | $1 \times 10^{-2}$ | $1 \times 10^{-2}$ | $1 \times 10^{-4}$ | $1 \times 10^{-2}$ | $1 \times 10^{-2}$ | $1 \times 10^{-4}$ | $1 \times 10^{-2}$ |
| cho_dec        | 1.06               | 3.23               | 1.00               | 0.69               | 1.68               | 0.66               | 0.53               | 1.03               | 0.51               |
| sk_rrSVD_001   | <b>2.82</b>        | 7.83               | 2.67               | <b>2.42</b>        | 4.3                | 2.33               | <b>2.13</b>        | 4.32               | 2.05               |
| sk_rrSVD_002   | <b>2.51</b>        | 6.83               | 2.39               | <b>2.05</b>        | 3.94               | 1.97               | <b>1.75</b>        | 2.99               | 1.68               |
| sk_rrSVD_003   | <b>2.27</b>        | 6.6                | 2.16               | <b>1.87</b>        | 3.91               | 1.79               | <b>1.55</b>        | 2.23               | 1.5                |
| sk_rrSVD_004   | <b>2.12</b>        | 4.94               | 2.01               | <b>1.72</b>        | 3.39               | 1.65               | <b>1.42</b>        | 2.17               | 1.38               |
| sk_rrSVD_005   | <b>2.03</b>        | 4.46               | 1.95               | <b>1.6</b>         | 3.1                | 1.52               | <b>1.3</b>         | 2.29               | 1.25               |
| sk_rrSVD_006   | <b>1.96</b>        | 5.53               | 1.84               | <b>1.49</b>        | 3.4                | 1.4                | <b>1.18</b>        | 2.1                | 1.13               |
| sk_rrSVD_007   | <b>1.89</b>        | 5.58               | 1.76               | <b>1.4</b>         | 2.85               | 1.34               | <b>1.1</b>         | 1.51               | 1.07               |
| sk_rrSVD_008   | <b>1.82</b>        | 5.25               | 1.71               | <b>1.33</b>        | 2.83               | 1.26               | <b>1.04</b>        | 1.71               | 1.00               |
| sk_rrSVD_009   | <b>1.76</b>        | 5.14               | 1.68               | <b>1.26</b>        | 2.29               | 1.22               | <b>0.98</b>        | 1.81               | 0.93               |
| sk_rrSVD_010   | <b>1.7</b>         | 5.04               | 1.61               | <b>1.21</b>        | 1.99               | 1.17               | <b>0.93</b>        | 1.67               | 0.89               |

  

| Dataset        | AuN100-4k          |                    |                    | AuN100-8k          |                    |                    | AuN100-12k         |                    |                    |
|----------------|--------------------|--------------------|--------------------|--------------------|--------------------|--------------------|--------------------|--------------------|--------------------|
|                | $\bar{x}$          | $\sigma$           | min(x)             | $\bar{x}$          | $\sigma$           | min(x)             | $\bar{x}$          | $\sigma$           | min(x)             |
| Method / coef. | $1 \times 10^{-2}$ | $1 \times 10^{-4}$ | $1 \times 10^{-2}$ | $1 \times 10^{-2}$ | $1 \times 10^{-4}$ | $1 \times 10^{-2}$ | $1 \times 10^{-2}$ | $1 \times 10^{-4}$ | $1 \times 10^{-2}$ |
| cho_dec        | 1.06               | 2.98               | 1.00               | 0.69               | 1.75               | 0.65               | 0.52               | 1.47               | 0.48               |
| sk_rrSVD_001   | <b>2.87</b>        | 8.03               | 2.73               | <b>2.44</b>        | 4.84               | 2.37               | <b>2.14</b>        | 3.5                | 2.07               |
| sk_rrSVD_002   | <b>2.51</b>        | 5.9                | 2.39               | <b>2.04</b>        | 4.61               | 1.97               | <b>1.73</b>        | 2.95               | 1.66               |
| sk_rrSVD_003   | <b>2.27</b>        | 5.4                | 2.15               | <b>1.86</b>        | 3.86               | 1.77               | <b>1.54</b>        | 3.25               | 1.47               |
| sk_rrSVD_004   | <b>2.13</b>        | 4.71               | 2.05               | <b>1.73</b>        | 3.27               | 1.65               | <b>1.41</b>        | 2.71               | 1.34               |
| sk_rrSVD_005   | <b>2.03</b>        | 5.03               | 1.93               | <b>1.6</b>         | 3.86               | 1.54               | <b>1.29</b>        | 2.51               | 1.23               |
| sk_rrSVD_006   | <b>1.96</b>        | 6.09               | 1.84               | <b>1.49</b>        | 2.67               | 1.44               | <b>1.18</b>        | 2.26               | 1.14               |
| sk_rrSVD_007   | <b>1.9</b>         | 4.62               | 1.81               | <b>1.4</b>         | 2.83               | 1.35               | <b>1.1</b>         | 2.19               | 1.04               |
| sk_rrSVD_008   | <b>1.84</b>        | 4.54               | 1.74               | <b>1.32</b>        | 2.51               | 1.27               | <b>1.03</b>        | 1.82               | 0.99               |
| sk_rrSVD_009   | <b>1.77</b>        | 4.52               | 1.68               | <b>1.27</b>        | 2.66               | 1.21               | <b>0.97</b>        | 1.93               | 0.93               |
| sk_rrSVD_010   | <b>1.71</b>        | 4.7                | 1.63               | <b>1.22</b>        | 2.21               | 1.17               | <b>0.91</b>        | 2.06               | 0.87               |



**Table S34.** Normalized RMSE mean, standard deviation and best result for Au<sub>38</sub>Q  $K = 90$ . Bolded means  $\bar{x}$  differ statistically from *Cholesky decomposition*.

| Dataset        | AuN2-4k            |                    |                    | AuN2-8k            |                    |                    | AuN2-12k           |                    |                    |
|----------------|--------------------|--------------------|--------------------|--------------------|--------------------|--------------------|--------------------|--------------------|--------------------|
|                | $\bar{x}$          | $\sigma$           | min(x)             | $\bar{x}$          | $\sigma$           | min(x)             | $\bar{x}$          | $\sigma$           | min(x)             |
| Method / coef. | $1 \times 10^{-2}$ | $1 \times 10^{-3}$ | $1 \times 10^{-2}$ | $1 \times 10^{-2}$ | $1 \times 10^{-4}$ | $1 \times 10^{-2}$ | $1 \times 10^{-2}$ | $1 \times 10^{-4}$ | $1 \times 10^{-2}$ |
| cho_dec        | 1.47               | 0.6                | 1.35               | 0.87               | 2.68               | 0.81               | 0.64               | 1.55               | 0.61               |
| sk_rrSVD_001   | <b>5.18</b>        | 1.72               | 4.83               | <b>4.38</b>        | 7.6                | 4.13               | <b>3.86</b>        | 8.15               | 3.64               |
| sk_rrSVD_002   | <b>4.42</b>        | 1.4                | 4.13               | <b>3.6</b>         | 7.06               | 3.42               | <b>2.96</b>        | 8.12               | 2.77               |
| sk_rrSVD_003   | <b>4.02</b>        | 1.22               | 3.73               | <b>3.04</b>        | 5.78               | 2.93               | <b>2.37</b>        | 5.35               | 2.26               |
| sk_rrSVD_004   | <b>3.69</b>        | 1.24               | 3.4                | <b>2.63</b>        | 5.82               | 2.47               | <b>2.02</b>        | 4.46               | 1.89               |
| sk_rrSVD_005   | <b>3.44</b>        | 1.2                | 3.18               | <b>2.36</b>        | 5.25               | 2.2                | <b>1.79</b>        | 4.23               | 1.7                |
| sk_rrSVD_006   | <b>3.21</b>        | 1.13               | 2.94               | <b>2.18</b>        | 4.32               | 2.04               | <b>1.62</b>        | 3.37               | 1.54               |
| sk_rrSVD_007   | <b>3.02</b>        | 1.07               | 2.81               | <b>2.03</b>        | 4.1                | 1.93               | <b>1.48</b>        | 3.5                | 1.39               |
| sk_rrSVD_008   | <b>2.84</b>        | 1.12               | 2.63               | <b>1.9</b>         | 4.27               | 1.8                | <b>1.38</b>        | 3.19               | 1.32               |
| sk_rrSVD_009   | <b>2.69</b>        | 1.04               | 2.48               | <b>1.8</b>         | 3.98               | 1.71               | <b>1.29</b>        | 2.35               | 1.23               |
| sk_rrSVD_010   | <b>2.59</b>        | 0.95               | 2.4                | <b>1.71</b>        | 3.59               | 1.63               | <b>1.22</b>        | 2.49               | 1.18               |

  

| Dataset        | AuN10-4k           |                    |                    | AuN10-8k           |                    |                    | AuN10-12k          |                    |                    |
|----------------|--------------------|--------------------|--------------------|--------------------|--------------------|--------------------|--------------------|--------------------|--------------------|
|                | $\bar{x}$          | $\sigma$           | min(x)             | $\bar{x}$          | $\sigma$           | min(x)             | $\bar{x}$          | $\sigma$           | min(x)             |
| Method / coef. | $1 \times 10^{-2}$ | $1 \times 10^{-4}$ | $1 \times 10^{-2}$ | $1 \times 10^{-2}$ | $1 \times 10^{-4}$ | $1 \times 10^{-2}$ | $1 \times 10^{-2}$ | $1 \times 10^{-4}$ | $1 \times 10^{-2}$ |
| cho_dec        | 1.03               | 3.02               | 0.97               | 0.67               | 1.64               | 0.64               | 0.51               | 0.97               | 0.5                |
| sk_rrSVD_001   | <b>2.82</b>        | 8.04               | 2.67               | <b>2.42</b>        | 4.14               | 2.33               | <b>2.13</b>        | 3.9                | 2.04               |
| sk_rrSVD_002   | <b>2.49</b>        | 7.29               | 2.32               | <b>2.05</b>        | 3.98               | 1.98               | <b>1.75</b>        | 3.01               | 1.67               |
| sk_rrSVD_003   | <b>2.26</b>        | 5.83               | 2.18               | <b>1.87</b>        | 3.69               | 1.8                | <b>1.55</b>        | 2.31               | 1.49               |
| sk_rrSVD_004   | <b>2.12</b>        | 5.36               | 2.03               | <b>1.72</b>        | 3.85               | 1.64               | <b>1.42</b>        | 2.25               | 1.37               |
| sk_rrSVD_005   | <b>2.03</b>        | 5.08               | 1.96               | <b>1.6</b>         | 2.91               | 1.51               | <b>1.3</b>         | 2.1                | 1.25               |
| sk_rrSVD_006   | <b>1.96</b>        | 5.62               | 1.86               | <b>1.49</b>        | 3.34               | 1.41               | <b>1.18</b>        | 2.37               | 1.14               |
| sk_rrSVD_007   | <b>1.89</b>        | 5.66               | 1.78               | <b>1.4</b>         | 2.82               | 1.33               | <b>1.1</b>         | 1.52               | 1.06               |
| sk_rrSVD_008   | <b>1.82</b>        | 5.37               | 1.72               | <b>1.32</b>        | 2.97               | 1.28               | <b>1.04</b>        | 1.56               | 1.00               |
| sk_rrSVD_009   | <b>1.75</b>        | 4.86               | 1.66               | <b>1.26</b>        | 2.38               | 1.22               | <b>0.97</b>        | 1.7                | 0.94               |
| sk_rrSVD_010   | <b>1.69</b>        | 4.73               | 1.61               | <b>1.21</b>        | 1.91               | 1.17               | <b>0.92</b>        | 1.54               | 0.89               |

  

| Dataset        | AuN100-4k          |                    |                    | AuN100-8k          |                    |                    | AuN100-12k         |                    |                    |
|----------------|--------------------|--------------------|--------------------|--------------------|--------------------|--------------------|--------------------|--------------------|--------------------|
|                | $\bar{x}$          | $\sigma$           | min(x)             | $\bar{x}$          | $\sigma$           | min(x)             | $\bar{x}$          | $\sigma$           | min(x)             |
| Method / coef. | $1 \times 10^{-2}$ | $1 \times 10^{-4}$ | $1 \times 10^{-2}$ | $1 \times 10^{-2}$ | $1 \times 10^{-4}$ | $1 \times 10^{-2}$ | $1 \times 10^{-2}$ | $1 \times 10^{-4}$ | $1 \times 10^{-2}$ |
| cho_dec        | 1.03               | 2.88               | 0.98               | 0.66               | 1.85               | 0.62               | 0.5                | 1.43               | 0.47               |
| sk_rrSVD_001   | <b>2.87</b>        | 7.04               | 2.7                | <b>2.45</b>        | 5.06               | 2.36               | <b>2.14</b>        | 3.11               | 2.07               |
| sk_rrSVD_002   | <b>2.5</b>         | 5.91               | 2.38               | <b>2.04</b>        | 4.14               | 1.95               | <b>1.73</b>        | 3.4                | 1.65               |
| sk_rrSVD_003   | <b>2.27</b>        | 5.29               | 2.16               | <b>1.86</b>        | 3.45               | 1.8                | <b>1.53</b>        | 3.16               | 1.47               |
| sk_rrSVD_004   | <b>2.12</b>        | 4.36               | 2.06               | <b>1.72</b>        | 3.57               | 1.64               | <b>1.41</b>        | 2.77               | 1.34               |
| sk_rrSVD_005   | <b>2.02</b>        | 4.8                | 1.93               | <b>1.6</b>         | 3.54               | 1.53               | <b>1.29</b>        | 2.31               | 1.24               |
| sk_rrSVD_006   | <b>1.96</b>        | 5.39               | 1.83               | <b>1.49</b>        | 3.14               | 1.44               | <b>1.18</b>        | 2.08               | 1.14               |
| sk_rrSVD_007   | <b>1.9</b>         | 4.77               | 1.8                | <b>1.39</b>        | 3.11               | 1.34               | <b>1.09</b>        | 2.25               | 1.04               |
| sk_rrSVD_008   | <b>1.84</b>        | 4.77               | 1.73               | <b>1.32</b>        | 2.41               | 1.28               | <b>1.03</b>        | 1.76               | 1.00               |
| sk_rrSVD_009   | <b>1.77</b>        | 3.91               | 1.69               | <b>1.26</b>        | 2.31               | 1.2                | <b>0.97</b>        | 1.79               | 0.94               |
| sk_rrSVD_010   | <b>1.71</b>        | 4.65               | 1.63               | <b>1.21</b>        | 2.67               | 1.17               | <b>0.91</b>        | 1.87               | 0.88               |

**Table S35.** Normalized RMSE mean, standard deviation and best result for  $\text{Au}_{38\text{Q}}$   $K = 100$ . Bolded means  $\bar{x}$  differ statistically from *Cholesky decomposition*.

| Dataset        | AuN2-4k            |                    |                    | AuN2-8k            |                    |                    | AuN2-12k           |                    |                    |
|----------------|--------------------|--------------------|--------------------|--------------------|--------------------|--------------------|--------------------|--------------------|--------------------|
|                | $\bar{x}$          | $\sigma$           | min(x)             | $\bar{x}$          | $\sigma$           | min(x)             | $\bar{x}$          | $\sigma$           | min(x)             |
| Method / coef. | $1 \times 10^{-2}$ | $1 \times 10^{-3}$ | $1 \times 10^{-2}$ | $1 \times 10^{-2}$ | $1 \times 10^{-4}$ | $1 \times 10^{-2}$ | $1 \times 10^{-2}$ | $1 \times 10^{-4}$ | $1 \times 10^{-2}$ |
| cho_dec        | 1.43               | 0.62               | 1.32               | 0.84               | 2.54               | 0.78               | 0.61               | 1.6                | 0.59               |
| sk_rrSVD_001   | <b>5.18</b>        | 1.76               | 4.84               | <b>4.37</b>        | 8.33               | 4.21               | <b>3.87</b>        | 8.71               | 3.61               |
| sk_rrSVD_002   | <b>4.42</b>        | 1.45               | 4.11               | <b>3.6</b>         | 7.29               | 3.39               | <b>2.94</b>        | 7.38               | 2.77               |
| sk_rrSVD_003   | <b>4.01</b>        | 1.28               | 3.76               | <b>3.05</b>        | 5.49               | 2.91               | <b>2.37</b>        | 4.96               | 2.26               |
| sk_rrSVD_004   | <b>3.68</b>        | 1.2                | 3.45               | <b>2.64</b>        | 5.31               | 2.52               | <b>2.02</b>        | 4.32               | 1.91               |
| sk_rrSVD_005   | <b>3.44</b>        | 1.32               | 3.18               | <b>2.35</b>        | 5.58               | 2.2                | <b>1.79</b>        | 4.23               | 1.7                |
| sk_rrSVD_006   | <b>3.22</b>        | 1.3                | 2.88               | <b>2.17</b>        | 4.88               | 2.03               | <b>1.61</b>        | 3.26               | 1.55               |
| sk_rrSVD_007   | <b>3.01</b>        | 1.05               | 2.71               | <b>2.03</b>        | 4.41               | 1.95               | <b>1.48</b>        | 3.31               | 1.39               |
| sk_rrSVD_008   | <b>2.83</b>        | 1.16               | 2.55               | <b>1.9</b>         | 5.05               | 1.79               | <b>1.37</b>        | 2.95               | 1.32               |
| sk_rrSVD_009   | <b>2.68</b>        | 1.07               | 2.47               | <b>1.79</b>        | 3.58               | 1.71               | <b>1.29</b>        | 2.4                | 1.23               |
| sk_rrSVD_010   | <b>2.58</b>        | 0.94               | 2.39               | <b>1.71</b>        | 4.00               | 1.63               | <b>1.22</b>        | 2.34               | 1.16               |

  

| Dataset        | AuN10-4k           |                    |                    | AuN10-8k           |                    |                    | AuN10-12k          |                    |                    |
|----------------|--------------------|--------------------|--------------------|--------------------|--------------------|--------------------|--------------------|--------------------|--------------------|
|                | $\bar{x}$          | $\sigma$           | min(x)             | $\bar{x}$          | $\sigma$           | min(x)             | $\bar{x}$          | $\sigma$           | min(x)             |
| Method / coef. | $1 \times 10^{-2}$ | $1 \times 10^{-4}$ | $1 \times 10^{-2}$ | $1 \times 10^{-2}$ | $1 \times 10^{-4}$ | $1 \times 10^{-2}$ | $1 \times 10^{-2}$ | $1 \times 10^{-4}$ | $1 \times 10^{-2}$ |
| cho_dec        | 1.01               | 2.92               | 0.94               | 0.65               | 1.66               | 0.62               | 0.5                | 1.04               | 0.48               |
| sk_rrSVD_001   | <b>2.82</b>        | 8.02               | 2.67               | <b>2.42</b>        | 5.27               | 2.3                | <b>2.13</b>        | 3.25               | 2.03               |
| sk_rrSVD_002   | <b>2.5</b>         | 6.33               | 2.37               | <b>2.05</b>        | 4.29               | 1.96               | <b>1.75</b>        | 2.91               | 1.69               |
| sk_rrSVD_003   | <b>2.27</b>        | 6.29               | 2.17               | <b>1.87</b>        | 3.72               | 1.78               | <b>1.55</b>        | 2.06               | 1.49               |
| sk_rrSVD_004   | <b>2.12</b>        | 5.82               | 2.02               | <b>1.72</b>        | 3.37               | 1.64               | <b>1.42</b>        | 2.11               | 1.38               |
| sk_rrSVD_005   | <b>2.03</b>        | 4.92               | 1.94               | <b>1.59</b>        | 2.96               | 1.54               | <b>1.3</b>         | 1.95               | 1.25               |
| sk_rrSVD_006   | <b>1.96</b>        | 5.92               | 1.86               | <b>1.49</b>        | 3.35               | 1.41               | <b>1.18</b>        | 2.09               | 1.14               |
| sk_rrSVD_007   | <b>1.89</b>        | 5.38               | 1.79               | <b>1.4</b>         | 2.89               | 1.33               | <b>1.1</b>         | 1.73               | 1.05               |
| sk_rrSVD_008   | <b>1.83</b>        | 5.13               | 1.72               | <b>1.32</b>        | 2.66               | 1.25               | <b>1.03</b>        | 1.51               | 1.00               |
| sk_rrSVD_009   | <b>1.75</b>        | 5.35               | 1.65               | <b>1.26</b>        | 2.64               | 1.21               | <b>0.97</b>        | 1.75               | 0.94               |
| sk_rrSVD_010   | <b>1.69</b>        | 4.21               | 1.63               | <b>1.21</b>        | 2.23               | 1.16               | <b>0.92</b>        | 1.47               | 0.89               |

  

| Dataset        | AuN100-4k          |                    |                    | AuN100-8k          |                    |                    | AuN100-12k         |                    |                    |
|----------------|--------------------|--------------------|--------------------|--------------------|--------------------|--------------------|--------------------|--------------------|--------------------|
|                | $\bar{x}$          | $\sigma$           | min(x)             | $\bar{x}$          | $\sigma$           | min(x)             | $\bar{x}$          | $\sigma$           | min(x)             |
| Method / coef. | $1 \times 10^{-2}$ | $1 \times 10^{-4}$ | $1 \times 10^{-2}$ | $1 \times 10^{-2}$ | $1 \times 10^{-4}$ | $1 \times 10^{-2}$ | $1 \times 10^{-2}$ | $1 \times 10^{-4}$ | $1 \times 10^{-2}$ |
| cho_dec        | 1.01               | 2.85               | 0.96               | 0.64               | 1.82               | 0.6                | 0.49               | 1.45               | 0.45               |
| sk_rrSVD_001   | <b>2.87</b>        | 7.59               | 2.72               | <b>2.44</b>        | 4.65               | 2.34               | <b>2.14</b>        | 3.74               | 2.07               |
| sk_rrSVD_002   | <b>2.5</b>         | 5.47               | 2.4                | <b>2.04</b>        | 4.41               | 1.96               | <b>1.73</b>        | 3.11               | 1.65               |
| sk_rrSVD_003   | <b>2.26</b>        | 5.00               | 2.13               | <b>1.87</b>        | 3.62               | 1.79               | <b>1.53</b>        | 2.8                | 1.48               |
| sk_rrSVD_004   | <b>2.13</b>        | 4.41               | 2.05               | <b>1.72</b>        | 3.33               | 1.65               | <b>1.41</b>        | 2.81               | 1.34               |
| sk_rrSVD_005   | <b>2.02</b>        | 5.05               | 1.92               | <b>1.6</b>         | 3.48               | 1.53               | <b>1.29</b>        | 2.28               | 1.24               |
| sk_rrSVD_006   | <b>1.96</b>        | 4.81               | 1.83               | <b>1.49</b>        | 3.16               | 1.44               | <b>1.18</b>        | 2.35               | 1.12               |
| sk_rrSVD_007   | <b>1.9</b>         | 5.04               | 1.81               | <b>1.39</b>        | 3.18               | 1.34               | <b>1.09</b>        | 1.94               | 1.05               |
| sk_rrSVD_008   | <b>1.83</b>        | 4.6                | 1.74               | <b>1.32</b>        | 2.57               | 1.26               | <b>1.03</b>        | 1.84               | 0.99               |
| sk_rrSVD_009   | <b>1.76</b>        | 3.81               | 1.66               | <b>1.26</b>        | 2.58               | 1.2                | <b>0.96</b>        | 1.61               | 0.93               |
| sk_rrSVD_010   | <b>1.71</b>        | 4.43               | 1.62               | <b>1.21</b>        | 2.59               | 1.17               | <b>0.91</b>        | 1.79               | 0.88               |

**Table S36.** Process time (s) mean, standard deviation and best result for Au<sub>38</sub>Q  $K = 10$ . Bolded means  $\bar{x}$  differ statistically from *Cholesky decomposition*.

| Dataset        | AuN2-4k         |                    |                 | AuN2-8k         |                    |                 | AuN2-12k        |                    |                 |
|----------------|-----------------|--------------------|-----------------|-----------------|--------------------|-----------------|-----------------|--------------------|-----------------|
|                | $\bar{x}$       | $\sigma$           | min(x)          | $\bar{x}$       | $\sigma$           | min(x)          | $\bar{x}$       | $\sigma$           | min(x)          |
| Method / coef. | $1 \times 10^1$ | $1 \times 10^{-1}$ | $1 \times 10^1$ | $1 \times 10^1$ | $1 \times 10^{-1}$ | $1 \times 10^1$ | $1 \times 10^1$ | $1 \times 10^{-1}$ | $1 \times 10^1$ |
| cho_dec        | 1.05            | 0.38               | 0.98            | 3.76            | 3.49               | 3.43            | 0.55            | 2.39               | 0.53            |
| sk_rrSVD_001   | <b>0.95</b>     | 1.06               | 0.88            | <b>1.95</b>     | 3.92               | 1.64            | <b>0.51</b>     | 7.04               | 0.46            |
| sk_rrSVD_002   | <b>1.12</b>     | 1.12               | 1.06            | <b>3.06</b>     | 7.71               | 2.59            | <b>0.81</b>     | 10.63              | 0.72            |
| sk_rrSVD_003   | <b>1.62</b>     | 1.47               | 1.54            | <b>4.63</b>     | 9.72               | 3.94            | <b>1.13</b>     | 15.28              | 1.01            |
| sk_rrSVD_004   | <b>2.04</b>     | 1.73               | 1.97            | <b>5.98</b>     | 12.23              | 5.18            | <b>1.42</b>     | 14.28              | 1.3             |
| sk_rrSVD_005   | <b>2.53</b>     | 1.79               | 2.44            | <b>7.56</b>     | 15.93              | 6.45            | <b>1.72</b>     | 14.32              | 1.62            |
| sk_rrSVD_006   | <b>2.96</b>     | 1.13               | 2.83            | <b>8.68</b>     | 13.3               | 7.74            | <b>1.94</b>     | 8.11               | 1.89            |
| sk_rrSVD_007   | <b>3.43</b>     | 1.29               | 3.32            | <b>9.65</b>     | 11.19              | 8.89            | <b>2.3</b>      | 6.78               | 2.25            |
| sk_rrSVD_008   | <b>3.85</b>     | 0.62               | 3.75            | <b>10.6</b>     | 5.12               | 10.11           | <b>2.72</b>     | 8.88               | 2.63            |
| sk_rrSVD_009   | <b>4.4</b>      | 3.15               | 4.22            | <b>11.9</b>     | 8.65               | 11.27           | <b>3.21</b>     | 14.08              | 3.04            |
| sk_rrSVD_010   | <b>4.79</b>     | 3.38               | 3.00            | <b>13.05</b>    | 5.41               | 12.53           | <b>3.44</b>     | 4.63               | 3.38            |

  

| Dataset        | AuN10-4k        |                    |                 | AuN10-8k        |                    |                 | AuN10-12k       |                    |                 |
|----------------|-----------------|--------------------|-----------------|-----------------|--------------------|-----------------|-----------------|--------------------|-----------------|
|                | $\bar{x}$       | $\sigma$           | min(x)          | $\bar{x}$       | $\sigma$           | min(x)          | $\bar{x}$       | $\sigma$           | min(x)          |
| Method / coef. | $1 \times 10^1$ | $1 \times 10^{-1}$ | $1 \times 10^1$ | $1 \times 10^1$ | $1 \times 10^{-1}$ | $1 \times 10^1$ | $1 \times 10^1$ | $1 \times 10^{-1}$ | $1 \times 10^1$ |
| cho_dec        | 1.21            | 3.68               | 0.82            | 3.63            | 2.31               | 3.36            | 0.55            | 2.56               | 0.53            |
| sk_rrSVD_001   | <b>1.09</b>     | 2.39               | 0.7             | <b>1.82</b>     | 3.35               | 1.6             | <b>0.5</b>      | 6.55               | 0.47            |
| sk_rrSVD_002   | 1.17            | 2.59               | 0.77            | <b>2.86</b>     | 4.00               | 2.53            | <b>0.78</b>     | 10.06              | 0.72            |
| sk_rrSVD_003   | <b>1.49</b>     | 3.54               | 0.92            | <b>4.14</b>     | 6.49               | 3.7             | <b>1.08</b>     | 14.6               | 0.99            |
| sk_rrSVD_004   | <b>1.88</b>     | 4.14               | 1.12            | <b>5.48</b>     | 7.52               | 5.05            | <b>1.42</b>     | 15.25              | 1.32            |
| sk_rrSVD_005   | <b>2.24</b>     | 4.31               | 1.36            | <b>7.05</b>     | 11.77              | 6.29            | <b>1.75</b>     | 19.59              | 1.61            |
| sk_rrSVD_006   | <b>2.63</b>     | 4.76               | 1.63            | <b>8.3</b>      | 12.4               | 7.55            | <b>1.96</b>     | 9.46               | 1.89            |
| sk_rrSVD_007   | <b>3.07</b>     | 5.95               | 1.88            | <b>9.3</b>      | 8.86               | 8.74            | <b>2.3</b>      | 7.65               | 2.21            |
| sk_rrSVD_008   | <b>3.52</b>     | 6.37               | 2.16            | <b>10.34</b>    | 6.25               | 9.89            | <b>2.73</b>     | 6.17               | 2.66            |
| sk_rrSVD_009   | <b>3.88</b>     | 6.79               | 2.44            | <b>11.57</b>    | 8.02               | 11.08           | <b>3.25</b>     | 18.94              | 3.01            |
| sk_rrSVD_010   | <b>4.3</b>      | 7.07               | 2.75            | <b>12.8</b>     | 7.16               | 12.24           | <b>3.47</b>     | 7.97               | 3.38            |

  

| Dataset        | AuN100-4k       |                    |                 | AuN100-8k       |                 |                 | AuN100-12k      |                 |                 |
|----------------|-----------------|--------------------|-----------------|-----------------|-----------------|-----------------|-----------------|-----------------|-----------------|
|                | $\bar{x}$       | $\sigma$           | min(x)          | $\bar{x}$       | $\sigma$        | min(x)          | $\bar{x}$       | $\sigma$        | min(x)          |
| Method / coef. | $1 \times 10^1$ | $1 \times 10^{-1}$ | $1 \times 10^1$ |
| cho_dec        | 1.18            | 1.41               | 1.05            | 3.55            | 0.25            | 3.24            | 0.52            | 0.11            | 0.5             |
| sk_rrSVD_001   | <b>1.03</b>     | 1.9                | 0.82            | <b>1.92</b>     | 0.34            | 1.66            | <b>0.51</b>     | 0.55            | 0.46            |
| sk_rrSVD_002   | 1.19            | 1.56               | 1.07            | <b>3.05</b>     | 0.66            | 2.6             | <b>0.84</b>     | 1.62            | 0.72            |
| sk_rrSVD_003   | <b>1.57</b>     | 0.76               | 1.52            | <b>4.53</b>     | 0.92            | 3.82            | <b>1.22</b>     | 2.06            | 1.01            |
| sk_rrSVD_004   | <b>1.98</b>     | 0.59               | 1.92            | <b>6.02</b>     | 1.12            | 5.13            | <b>1.49</b>     | 1.7             | 1.32            |
| sk_rrSVD_005   | <b>2.43</b>     | 0.61               | 2.37            | <b>7.62</b>     | 1.64            | 6.33            | <b>1.81</b>     | 2.02            | 1.62            |
| sk_rrSVD_006   | <b>2.8</b>      | 0.62               | 2.74            | <b>8.8</b>      | 1.74            | 7.5             | <b>1.95</b>     | 0.67            | 1.86            |
| sk_rrSVD_007   | <b>3.25</b>     | 1.04               | 3.17            | <b>9.87</b>     | 1.45            | 8.96            | <b>2.32</b>     | 1.08            | 2.21            |
| sk_rrSVD_008   | <b>3.75</b>     | 2.16               | 3.63            | <b>10.96</b>    | 1.14            | 10.24           | <b>2.78</b>     | 1.34            | 2.64            |
| sk_rrSVD_009   | <b>4.32</b>     | 1.17               | 4.12            | <b>12.28</b>    | 1.34            | 11.46           | <b>3.17</b>     | 1.52            | 3.01            |
| sk_rrSVD_010   | <b>4.66</b>     | 0.84               | 4.54            | <b>13.49</b>    | 1.09            | 12.67           | <b>3.45</b>     | 0.64            | 3.36            |

**Table S37.** Process time (s) mean, standard deviation and best result for Au<sub>38</sub>Q  $K = 20$ . Bolded means  $\bar{x}$  differ statistically from *Cholesky decomposition*.

| Dataset        | AuN2-4k         |                    |                 | AuN2-8k         |                 |                 | AuN2-12k        |                    |                 |
|----------------|-----------------|--------------------|-----------------|-----------------|-----------------|-----------------|-----------------|--------------------|-----------------|
|                | $\bar{x}$       | $\sigma$           | min(x)          | $\bar{x}$       | $\sigma$        | min(x)          | $\bar{x}$       | $\sigma$           | min(x)          |
| Method / coef. | $1 \times 10^1$ | $1 \times 10^{-1}$ | $1 \times 10^1$ | $1 \times 10^{-1}$ | $1 \times 10^1$ |
| cho_dec        | 2.3             | 1.43               | 2.09            | 0.57            | 0.15            | 5.41            | 1.45            | 6.98               | 1.38            |
| sk_rrSVD_001   | <b>1.1</b>      | 1.81               | 0.92            | <b>0.37</b>     | 0.24            | 3.45            | <b>0.97</b>     | 6.32               | 0.89            |
| sk_rrSVD_002   | <b>1.29</b>     | 2.57               | 1.03            | <b>0.53</b>     | 0.47            | 4.79            | <b>1.35</b>     | 13.02              | 1.21            |
| sk_rrSVD_003   | <b>1.76</b>     | 4.54               | 1.29            | <b>0.69</b>     | 0.79            | 6.25            | <b>1.72</b>     | 15.3               | 1.6             |
| sk_rrSVD_004   | 2.16            | 5.24               | 1.59            | <b>0.89</b>     | 1.45            | 7.7             | <b>2.13</b>     | 16.52              | 1.97            |
| sk_rrSVD_005   | 2.61            | 6.61               | 1.95            | <b>1.06</b>     | 1.63            | 9.28            | <b>2.49</b>     | 11.52              | 2.37            |
| sk_rrSVD_006   | <b>3.23</b>     | 8.44               | 2.39            | <b>1.23</b>     | 1.83            | 11.03           | <b>2.92</b>     | 7.91               | 2.78            |
| sk_rrSVD_007   | <b>3.84</b>     | 9.41               | 2.79            | <b>1.43</b>     | 2.06            | 12.6            | <b>3.34</b>     | 8.78               | 3.21            |
| sk_rrSVD_008   | <b>4.51</b>     | 11.55              | 3.19            | <b>1.6</b>      | 1.91            | 14.38           | <b>3.98</b>     | 6.23               | 3.82            |
| sk_rrSVD_009   | <b>5.1</b>      | 12.69              | 3.61            | <b>1.74</b>     | 1.45            | 16.13           | <b>4.7</b>      | 15.21              | 4.42            |
| sk_rrSVD_010   | <b>5.78</b>     | 13.00              | 4.11            | <b>1.89</b>     | 1.08            | 18.1            | <b>4.91</b>     | 5.86               | 4.8             |

  

| Dataset        | AuN10-4k        |                    |                 | AuN10-8k        |                 |                 | AuN10-12k       |                 |                 |
|----------------|-----------------|--------------------|-----------------|-----------------|-----------------|-----------------|-----------------|-----------------|-----------------|
|                | $\bar{x}$       | $\sigma$           | min(x)          | $\bar{x}$       | $\sigma$        | min(x)          | $\bar{x}$       | $\sigma$        | min(x)          |
| Method / coef. | $1 \times 10^1$ | $1 \times 10^{-1}$ | $1 \times 10^1$ |
| cho_dec        | 2.35            | 3.04               | 2.11            | 0.57            | 0.34            | 5.49            | 1.45            | 0.82            | 1.34            |
| sk_rrSVD_001   | <b>1.19</b>     | 1.94               | 0.94            | <b>0.39</b>     | 0.52            | 3.47            | <b>0.97</b>     | 0.93            | 0.85            |
| sk_rrSVD_002   | <b>1.47</b>     | 2.71               | 1.08            | <b>0.53</b>     | 0.71            | 4.78            | <b>1.36</b>     | 1.6             | 1.15            |
| sk_rrSVD_003   | <b>1.95</b>     | 3.71               | 1.3             | <b>0.71</b>     | 1.13            | 6.18            | <b>1.78</b>     | 2.02            | 1.51            |
| sk_rrSVD_004   | <b>2.5</b>      | 5.4                | 1.6             | <b>0.89</b>     | 1.56            | 7.56            | <b>2.22</b>     | 2.42            | 1.93            |
| sk_rrSVD_005   | <b>2.98</b>     | 5.69               | 1.89            | <b>1.02</b>     | 1.49            | 9.01            | <b>2.49</b>     | 1.69            | 2.3             |
| sk_rrSVD_006   | <b>3.61</b>     | 5.5                | 2.28            | <b>1.18</b>     | 1.76            | 10.73           | <b>2.87</b>     | 0.93            | 2.76            |
| sk_rrSVD_007   | <b>4.27</b>     | 7.55               | 2.68            | <b>1.34</b>     | 1.79            | 12.16           | <b>3.31</b>     | 1.4             | 3.17            |
| sk_rrSVD_008   | <b>4.78</b>     | 8.02               | 3.1             | <b>1.5</b>      | 1.63            | 13.92           | <b>3.96</b>     | 2.03            | 3.77            |
| sk_rrSVD_009   | <b>5.45</b>     | 8.95               | 3.45            | <b>1.68</b>     | 1.59            | 15.67           | <b>4.6</b>      | 1.95            | 4.25            |
| sk_rrSVD_010   | <b>6.18</b>     | 10.29              | 3.9             | <b>1.88</b>     | 1.92            | 17.6            | <b>4.87</b>     | 1.03            | 4.74            |

  

| Dataset        | AuN100-4k       |                    |                 | AuN100-8k       |                 |                 | AuN100-12k      |                 |                 |
|----------------|-----------------|--------------------|-----------------|-----------------|-----------------|-----------------|-----------------|-----------------|-----------------|
|                | $\bar{x}$       | $\sigma$           | min(x)          | $\bar{x}$       | $\sigma$        | min(x)          | $\bar{x}$       | $\sigma$        | min(x)          |
| Method / coef. | $1 \times 10^1$ | $1 \times 10^{-1}$ | $1 \times 10^1$ |
| cho_dec        | 2.55            | 2.58               | 2.1             | 0.57            | 0.22            | 5.41            | 1.48            | 1.19            | 1.37            |
| sk_rrSVD_001   | <b>1.26</b>     | 2.51               | 0.94            | <b>0.39</b>     | 0.5             | 3.38            | <b>0.99</b>     | 1.09            | 0.87            |
| sk_rrSVD_002   | <b>1.43</b>     | 2.77               | 1.02            | 0.57            | 1.05            | 4.55            | 1.47            | 1.76            | 1.2             |
| sk_rrSVD_003   | <b>1.91</b>     | 3.57               | 1.25            | <b>0.75</b>     | 1.17            | 5.97            | <b>1.93</b>     | 2.11            | 1.57            |
| sk_rrSVD_004   | 2.34            | 4.29               | 1.54            | <b>0.97</b>     | 1.61            | 7.69            | <b>2.2</b>      | 2.46            | 1.97            |
| sk_rrSVD_005   | <b>2.82</b>     | 5.08               | 1.84            | <b>1.14</b>     | 1.95            | 9.18            | <b>2.49</b>     | 1.71            | 2.32            |
| sk_rrSVD_006   | <b>3.59</b>     | 8.43               | 2.25            | <b>1.28</b>     | 1.97            | 10.81           | <b>2.91</b>     | 1.46            | 2.78            |
| sk_rrSVD_007   | <b>4.05</b>     | 8.19               | 2.61            | <b>1.43</b>     | 1.96            | 12.32           | <b>3.27</b>     | 1.09            | 3.16            |
| sk_rrSVD_008   | <b>4.64</b>     | 9.27               | 3.03            | <b>1.6</b>      | 2.08            | 14.02           | <b>3.92</b>     | 0.84            | 3.78            |
| sk_rrSVD_009   | <b>5.38</b>     | 11.12              | 3.44            | <b>1.74</b>     | 1.84            | 15.71           | <b>4.65</b>     | 1.56            | 4.28            |
| sk_rrSVD_010   | <b>6.15</b>     | 14.37              | 3.89            | <b>1.91</b>     | 1.9             | 17.36           | <b>4.84</b>     | 1.18            | 4.66            |

**Table S38.** Process time (s) mean, standard deviation and best result for Au<sub>38</sub>Q  $K = 30$ . Bolded means  $\bar{x}$  differ statistically from *Cholesky decomposition*.

| Dataset        | AuN2-4k         |                    |                 | AuN2-8k         |                 |                 | AuN2-12k        |                 |                 |
|----------------|-----------------|--------------------|-----------------|-----------------|-----------------|-----------------|-----------------|-----------------|-----------------|
|                | $\bar{x}$       | $\sigma$           | min(x)          | $\bar{x}$       | $\sigma$        | min(x)          | $\bar{x}$       | $\sigma$        | min(x)          |
| Method / coef. | $1 \times 10^1$ | $1 \times 10^{-1}$ | $1 \times 10^1$ |
| cho_dec        | 2.43            | 1.64               | 2.21            | 1.04            | 1.06            | 0.97            | 2.91            | 0.88            | 2.79            |
| sk_rrSVD_001   | <b>1.32</b>     | 0.93               | 1.22            | <b>0.55</b>     | 0.67            | 0.5             | <b>1.51</b>     | 1.44            | 1.38            |
| sk_rrSVD_002   | <b>1.54</b>     | 1.9                | 1.39            | <b>0.8</b>      | 1.63            | 0.65            | <b>2.02</b>     | 2.22            | 1.8             |
| sk_rrSVD_003   | <b>2.07</b>     | 3.8                | 1.79            | 1.02            | 1.91            | 0.83            | <b>2.49</b>     | 2.52            | 2.2             |
| sk_rrSVD_004   | <b>2.46</b>     | 4.86               | 2.08            | <b>1.2</b>      | 1.8             | 1.00            | 2.93            | 2.13            | 2.71            |
| sk_rrSVD_005   | <b>2.96</b>     | 6.37               | 2.46            | <b>1.34</b>     | 1.98            | 1.16            | <b>3.32</b>     | 1.88            | 3.18            |
| sk_rrSVD_006   | <b>3.58</b>     | 9.08               | 2.97            | <b>1.56</b>     | 2.2             | 1.39            | <b>3.8</b>      | 1.47            | 3.64            |
| sk_rrSVD_007   | <b>4.14</b>     | 9.72               | 3.41            | <b>1.72</b>     | 1.95            | 1.55            | <b>4.28</b>     | 1.45            | 4.09            |
| sk_rrSVD_008   | <b>4.83</b>     | 11.74              | 3.92            | <b>1.9</b>      | 1.53            | 1.76            | <b>5.05</b>     | 1.7             | 4.84            |
| sk_rrSVD_009   | <b>5.26</b>     | 13.11              | 4.35            | <b>2.09</b>     | 1.74            | 1.95            | <b>5.75</b>     | 1.9             | 5.42            |
| sk_rrSVD_010   | <b>5.33</b>     | 8.51               | 4.88            | <b>2.29</b>     | 1.57            | 2.17            | <b>6.04</b>     | 1.14            | 5.86            |

  

| Dataset        | AuN10-4k        |                    |                 | AuN10-8k        |                 |                 | AuN10-12k       |                 |                 |
|----------------|-----------------|--------------------|-----------------|-----------------|-----------------|-----------------|-----------------|-----------------|-----------------|
|                | $\bar{x}$       | $\sigma$           | min(x)          | $\bar{x}$       | $\sigma$        | min(x)          | $\bar{x}$       | $\sigma$        | min(x)          |
| Method / coef. | $1 \times 10^1$ | $1 \times 10^{-1}$ | $1 \times 10^1$ |
| cho_dec        | 2.57            | 2.29               | 2.18            | 1.04            | 0.59            | 1.00            | 2.98            | 1.75            | 2.83            |
| sk_rrSVD_001   | <b>1.48</b>     | 1.13               | 1.22            | <b>0.56</b>     | 0.56            | 0.51            | <b>1.6</b>      | 1.78            | 1.37            |
| sk_rrSVD_002   | <b>1.81</b>     | 1.99               | 1.47            | <b>0.8</b>      | 1.41            | 0.66            | <b>2.12</b>     | 2.5             | 1.76            |
| sk_rrSVD_003   | <b>2.37</b>     | 2.97               | 1.77            | 1.03            | 1.66            | 0.84            | <b>2.5</b>      | 1.99            | 2.24            |
| sk_rrSVD_004   | <b>2.99</b>     | 3.73               | 2.09            | <b>1.22</b>     | 1.64            | 0.98            | 2.98            | 2.44            | 2.74            |
| sk_rrSVD_005   | <b>3.58</b>     | 4.44               | 2.45            | <b>1.4</b>      | 1.89            | 1.13            | <b>3.42</b>     | 2.08            | 3.19            |
| sk_rrSVD_006   | <b>4.34</b>     | 6.41               | 2.99            | <b>1.58</b>     | 2.29            | 1.34            | <b>3.9</b>      | 1.65            | 3.66            |
| sk_rrSVD_007   | <b>5.04</b>     | 6.65               | 3.44            | <b>1.77</b>     | 2.32            | 1.51            | <b>4.36</b>     | 1.51            | 4.14            |
| sk_rrSVD_008   | <b>5.71</b>     | 7.14               | 3.91            | <b>1.87</b>     | 1.69            | 1.73            | <b>5.2</b>      | 1.82            | 4.86            |
| sk_rrSVD_009   | <b>6.59</b>     | 9.17               | 4.37            | <b>2.08</b>     | 1.83            | 1.91            | <b>5.97</b>     | 2.79            | 5.49            |
| sk_rrSVD_010   | <b>7.15</b>     | 10.85              | 4.89            | <b>2.25</b>     | 1.52            | 2.1             | <b>6.32</b>     | 2.59            | 5.95            |

  

| Dataset        | AuN100-4k       |                    |                 | AuN100-8k       |                 |                 | AuN100-12k      |                 |                 |
|----------------|-----------------|--------------------|-----------------|-----------------|-----------------|-----------------|-----------------|-----------------|-----------------|
|                | $\bar{x}$       | $\sigma$           | min(x)          | $\bar{x}$       | $\sigma$        | min(x)          | $\bar{x}$       | $\sigma$        | min(x)          |
| Method / coef. | $1 \times 10^1$ | $1 \times 10^{-1}$ | $1 \times 10^1$ |
| cho_dec        | 2.62            | 2.79               | 2.18            | 1.03            | 0.81            | 0.97            | 2.88            | 0.39            | 2.81            |
| sk_rrSVD_001   | <b>1.54</b>     | 1.98               | 1.27            | <b>0.58</b>     | 0.75            | 0.5             | <b>1.43</b>     | 0.81            | 1.35            |
| sk_rrSVD_002   | <b>1.81</b>     | 3.46               | 1.39            | <b>0.83</b>     | 1.47            | 0.66            | <b>2.04</b>     | 2.44            | 1.72            |
| sk_rrSVD_003   | <b>2.45</b>     | 5.5                | 1.7             | <b>1.13</b>     | 1.86            | 0.84            | <b>2.5</b>      | 2.19            | 2.23            |
| sk_rrSVD_004   | <b>2.91</b>     | 5.69               | 2.00            | <b>1.3</b>      | 1.89            | 0.99            | 2.94            | 1.83            | 2.74            |
| sk_rrSVD_005   | <b>3.56</b>     | 7.07               | 2.37            | <b>1.44</b>     | 1.87            | 1.14            | <b>3.24</b>     | 1.22            | 3.12            |
| sk_rrSVD_006   | <b>4.25</b>     | 7.43               | 2.9             | <b>1.64</b>     | 2.11            | 1.36            | <b>3.73</b>     | 1.32            | 3.58            |
| sk_rrSVD_007   | <b>4.83</b>     | 7.87               | 3.29            | <b>1.75</b>     | 2.1             | 1.54            | <b>4.19</b>     | 1.2             | 4.03            |
| sk_rrSVD_008   | <b>5.54</b>     | 9.28               | 3.76            | <b>1.89</b>     | 1.69            | 1.72            | <b>4.87</b>     | 1.29            | 4.72            |
| sk_rrSVD_009   | <b>6.25</b>     | 11.01              | 4.36            | <b>2.07</b>     | 1.56            | 1.9             | <b>5.66</b>     | 1.5             | 5.32            |
| sk_rrSVD_010   | <b>6.66</b>     | 12.71              | 4.83            | <b>2.3</b>      | 1.77            | 2.12            | <b>5.9</b>      | 1.21            | 5.81            |

**Table S39.** Process time (s) mean, standard deviation and best result for Au<sub>38</sub>Q  $K = 40$ . Bolded means  $\bar{x}$  differ statistically from *Cholesky decomposition*.

| Dataset        | AuN2-4k         |                    |                 | AuN2-8k         |                 |                 | AuN2-12k        |                 |                 |
|----------------|-----------------|--------------------|-----------------|-----------------|-----------------|-----------------|-----------------|-----------------|-----------------|
|                | $\bar{x}$       | $\sigma$           | min(x)          | $\bar{x}$       | $\sigma$        | min(x)          | $\bar{x}$       | $\sigma$        | min(x)          |
| Method / coef. | $1 \times 10^1$ | $1 \times 10^{-1}$ | $1 \times 10^1$ |
| cho_dec        | 4.14            | 2.74               | 3.69            | 1.74            | 0.6             | 1.66            | 4.64            | 1.73            | 4.5             |
| sk_rrSVD_001   | <b>2.01</b>     | 1.94               | 1.71            | <b>0.75</b>     | 0.87            | 0.68            | <b>2.16</b>     | 1.57            | 2.00            |
| sk_rrSVD_002   | <b>2.17</b>     | 2.2                | 1.92            | <b>1.00</b>     | 1.3             | 0.89            | <b>2.63</b>     | 1.54            | 2.48            |
| sk_rrSVD_003   | <b>2.8</b>      | 3.7                | 2.43            | <b>1.25</b>     | 1.78            | 1.08            | <b>3.21</b>     | 2.36            | 3.01            |
| sk_rrSVD_004   | <b>3.27</b>     | 4.85               | 2.84            | <b>1.5</b>      | 2.27            | 1.25            | <b>3.77</b>     | 1.52            | 3.57            |
| sk_rrSVD_005   | <b>3.78</b>     | 6.43               | 3.24            | 1.73            | 2.47            | 1.5             | <b>4.26</b>     | 1.59            | 4.05            |
| sk_rrSVD_006   | 4.53            | 8.6                | 3.8             | <b>1.96</b>     | 2.46            | 1.72            | <b>4.78</b>     | 1.25            | 4.62            |
| sk_rrSVD_007   | <b>5.22</b>     | 9.41               | 4.34            | <b>2.11</b>     | 2.02            | 1.94            | <b>5.26</b>     | 0.98            | 5.12            |
| sk_rrSVD_008   | <b>5.84</b>     | 11.73              | 4.9             | <b>2.29</b>     | 1.74            | 2.14            | <b>6.16</b>     | 1.38            | 5.93            |
| sk_rrSVD_009   | <b>6.28</b>     | 11.68              | 5.42            | <b>2.51</b>     | 1.83            | 2.36            | <b>6.92</b>     | 2.26            | 6.6             |
| sk_rrSVD_010   | <b>6.78</b>     | 12.33              | 6.02            | <b>2.73</b>     | 1.3             | 2.61            | <b>7.33</b>     | 1.84            | 6.98            |

  

| Dataset        | AuN10-4k        |                    |                 | AuN10-8k        |                 |                 | AuN10-12k       |                 |                 |
|----------------|-----------------|--------------------|-----------------|-----------------|-----------------|-----------------|-----------------|-----------------|-----------------|
|                | $\bar{x}$       | $\sigma$           | min(x)          | $\bar{x}$       | $\sigma$        | min(x)          | $\bar{x}$       | $\sigma$        | min(x)          |
| Method / coef. | $1 \times 10^1$ | $1 \times 10^{-1}$ | $1 \times 10^1$ |
| cho_dec        | 3.92            | 3.34               | 3.48            | 1.76            | 0.81            | 1.68            | 5.72            | 9.83            | 4.54            |
| sk_rrSVD_001   | <b>1.98</b>     | 3.1                | 1.67            | <b>0.76</b>     | 1.00            | 0.69            | <b>2.29</b>     | 2.13            | 2.03            |
| sk_rrSVD_002   | <b>2.18</b>     | 3.67               | 1.89            | <b>1.01</b>     | 1.45            | 0.88            | <b>2.86</b>     | 2.76            | 2.49            |
| sk_rrSVD_003   | <b>2.76</b>     | 5.19               | 2.33            | <b>1.25</b>     | 1.83            | 1.07            | <b>3.33</b>     | 2.59            | 3.00            |
| sk_rrSVD_004   | <b>3.28</b>     | 5.44               | 2.79            | <b>1.47</b>     | 1.98            | 1.29            | <b>3.93</b>     | 1.85            | 3.64            |
| sk_rrSVD_005   | <b>3.81</b>     | 6.72               | 3.15            | <b>1.66</b>     | 2.03            | 1.48            | <b>4.4</b>      | 2.1             | 4.08            |
| sk_rrSVD_006   | <b>4.62</b>     | 8.69               | 3.76            | <b>1.88</b>     | 2.23            | 1.7             | 5.03            | 3.3             | 4.64            |
| sk_rrSVD_007   | <b>5.25</b>     | 9.77               | 4.26            | <b>2.07</b>     | 2.11            | 1.9             | 5.51            | 2.35            | 5.16            |
| sk_rrSVD_008   | <b>6.04</b>     | 11.66              | 4.87            | <b>2.27</b>     | 1.35            | 2.12            | <b>6.55</b>     | 4.07            | 6.00            |
| sk_rrSVD_009   | <b>6.25</b>     | 12.88              | 5.3             | <b>2.56</b>     | 2.14            | 2.37            | <b>7.29</b>     | 3.94            | 6.67            |
| sk_rrSVD_010   | <b>6.71</b>     | 12.97              | 5.89            | <b>2.82</b>     | 2.22            | 2.61            | <b>7.58</b>     | 3.85            | 7.17            |

  

| Dataset        | AuN100-4k       |                 |                 | AuN100-8k       |                 |                 | AuN100-12k      |                 |                 |
|----------------|-----------------|-----------------|-----------------|-----------------|-----------------|-----------------|-----------------|-----------------|-----------------|
|                | $\bar{x}$       | $\sigma$        | min(x)          | $\bar{x}$       | $\sigma$        | min(x)          | $\bar{x}$       | $\sigma$        | min(x)          |
| Method / coef. | $1 \times 10^1$ |
| cho_dec        | 4.00            | 0.32            | 3.59            | 1.76            | 0.38            | 1.7             | 4.56            | 0.72            | 4.45            |
| sk_rrSVD_001   | <b>2.03</b>     | 0.25            | 1.72            | <b>0.75</b>     | 0.33            | 0.7             | <b>2.11</b>     | 0.87            | 2.01            |
| sk_rrSVD_002   | <b>2.31</b>     | 0.41            | 1.91            | <b>1.07</b>     | 1.6             | 0.91            | <b>2.58</b>     | 1.53            | 2.45            |
| sk_rrSVD_003   | <b>3.02</b>     | 0.75            | 2.35            | <b>1.4</b>      | 2.01            | 1.1             | <b>3.12</b>     | 1.3             | 2.99            |
| sk_rrSVD_004   | <b>3.79</b>     | 1.08            | 2.83            | <b>1.57</b>     | 2.05            | 1.3             | <b>3.76</b>     | 1.67            | 3.57            |
| sk_rrSVD_005   | 4.28            | 1.15            | 3.18            | 1.75            | 2.13            | 1.5             | <b>4.23</b>     | 1.47            | 4.05            |
| sk_rrSVD_006   | <b>5.03</b>     | 1.1             | 3.76            | <b>2.01</b>     | 2.48            | 1.74            | <b>4.7</b>      | 1.24            | 4.55            |
| sk_rrSVD_007   | <b>5.71</b>     | 1.19            | 4.29            | <b>2.16</b>     | 2.07            | 1.94            | <b>5.24</b>     | 1.39            | 5.07            |
| sk_rrSVD_008   | <b>6.59</b>     | 1.3             | 4.82            | <b>2.33</b>     | 1.72            | 2.17            | <b>6.1</b>      | 1.77            | 5.79            |
| sk_rrSVD_009   | <b>6.94</b>     | 1.41            | 5.31            | <b>2.58</b>     | 1.69            | 2.38            | <b>6.88</b>     | 1.88            | 6.56            |
| sk_rrSVD_010   | <b>7.13</b>     | 1.34            | 5.77            | <b>2.79</b>     | 1.81            | 2.64            | <b>7.22</b>     | 1.49            | 7.04            |

**Table S40.** Process time (s) mean, standard deviation and best result for Au<sub>38</sub>Q  $K = 50$ . Bolded means  $\bar{x}$  differ statistically from *Cholesky decomposition*.

| Dataset        | AuN2-4k         |                    |                 | AuN2-8k         |                 |                 | AuN2-12k        |                 |                 |
|----------------|-----------------|--------------------|-----------------|-----------------|-----------------|-----------------|-----------------|-----------------|-----------------|
|                | $\bar{x}$       | $\sigma$           | min(x)          | $\bar{x}$       | $\sigma$        | min(x)          | $\bar{x}$       | $\sigma$        | min(x)          |
| Method / coef. | $1 \times 10^1$ | $1 \times 10^{-1}$ | $1 \times 10^1$ |
| cho_dec        | 5.66            | 2.42               | 5.37            | 2.54            | 0.89            | 2.43            | 7.43            | 7.86            | 6.62            |
| sk_rrSVD_001   | <b>2.33</b>     | 1.23               | 2.21            | <b>1.07</b>     | 1.95            | 0.91            | <b>2.92</b>     | 2.43            | 2.65            |
| sk_rrSVD_002   | <b>2.74</b>     | 3.44               | 2.51            | <b>1.39</b>     | 2.22            | 1.15            | <b>3.51</b>     | 2.35            | 3.18            |
| sk_rrSVD_003   | <b>3.59</b>     | 4.05               | 3.18            | <b>1.61</b>     | 2.06            | 1.37            | <b>4.06</b>     | 2.31            | 3.8             |
| sk_rrSVD_004   | <b>4.2</b>      | 6.04               | 3.53            | <b>1.81</b>     | 2.07            | 1.58            | <b>4.68</b>     | 1.85            | 4.41            |
| sk_rrSVD_005   | <b>4.62</b>     | 6.89               | 4.00            | <b>2.03</b>     | 2.01            | 1.79            | <b>5.21</b>     | 1.98            | 4.93            |
| sk_rrSVD_006   | <b>5.29</b>     | 8.84               | 4.44            | <b>2.27</b>     | 2.03            | 2.08            | <b>5.78</b>     | 1.66            | 5.56            |
| sk_rrSVD_007   | 6.03            | 9.56               | 5.09            | <b>2.45</b>     | 1.64            | 2.31            | <b>6.44</b>     | 2.52            | 6.14            |
| sk_rrSVD_008   | <b>6.51</b>     | 10.00              | 5.63            | <b>2.69</b>     | 1.17            | 2.55            | 7.35            | 1.87            | 7.02            |
| sk_rrSVD_009   | <b>7.32</b>     | 13.03              | 6.22            | <b>2.94</b>     | 1.6             | 2.81            | <b>8.23</b>     | 2.63            | 7.74            |
| sk_rrSVD_010   | <b>7.76</b>     | 12.23              | 6.95            | <b>3.2</b>      | 1.41            | 3.05            | <b>8.69</b>     | 2.2             | 8.41            |

  

| Dataset        | AuN10-4k        |                    |                 | AuN10-8k        |                 |                 | AuN10-12k       |                 |                 |
|----------------|-----------------|--------------------|-----------------|-----------------|-----------------|-----------------|-----------------|-----------------|-----------------|
|                | $\bar{x}$       | $\sigma$           | min(x)          | $\bar{x}$       | $\sigma$        | min(x)          | $\bar{x}$       | $\sigma$        | min(x)          |
| Method / coef. | $1 \times 10^1$ | $1 \times 10^{-1}$ | $1 \times 10^1$ |
| cho_dec        | 5.74            | 4.82               | 5.21            | 2.54            | 0.69            | 2.45            | 8.95            | 15.29           | 6.65            |
| sk_rrSVD_001   | <b>2.41</b>     | 3.36               | 2.15            | <b>1.05</b>     | 1.86            | 0.89            | <b>3.28</b>     | 5.62            | 2.68            |
| sk_rrSVD_002   | <b>2.87</b>     | 4.34               | 2.43            | <b>1.41</b>     | 2.04            | 1.17            | <b>3.52</b>     | 2.69            | 3.17            |
| sk_rrSVD_003   | <b>3.65</b>     | 7.86               | 3.00            | <b>1.66</b>     | 1.78            | 1.38            | <b>4.27</b>     | 5.82            | 3.79            |
| sk_rrSVD_004   | <b>4.32</b>     | 9.18               | 3.42            | <b>1.86</b>     | 2.24            | 1.57            | <b>4.88</b>     | 3.31            | 4.42            |
| sk_rrSVD_005   | <b>4.83</b>     | 8.62               | 3.83            | <b>2.07</b>     | 2.39            | 1.77            | <b>5.49</b>     | 3.6             | 5.04            |
| sk_rrSVD_006   | 5.65            | 10.22              | 4.48            | <b>2.28</b>     | 2.17            | 2.04            | <b>6.1</b>      | 3.63            | 5.62            |
| sk_rrSVD_007   | 6.46            | 11.91              | 5.01            | <b>2.51</b>     | 2.18            | 2.28            | <b>6.96</b>     | 4.38            | 6.23            |
| sk_rrSVD_008   | <b>6.98</b>     | 13.82              | 5.68            | <b>2.73</b>     | 1.88            | 2.51            | <b>8.17</b>     | 8.69            | 7.13            |
| sk_rrSVD_009   | <b>7.02</b>     | 9.81               | 6.25            | <b>2.96</b>     | 1.85            | 2.79            | 8.86            | 7.59            | 7.73            |
| sk_rrSVD_010   | <b>7.6</b>      | 11.53              | 6.81            | <b>3.17</b>     | 1.65            | 3.04            | 9.18            | 6.24            | 8.41            |

  

| Dataset        | AuN100-4k       |                    |                 | AuN100-8k       |                 |                 | AuN100-12k      |                 |                 |
|----------------|-----------------|--------------------|-----------------|-----------------|-----------------|-----------------|-----------------|-----------------|-----------------|
|                | $\bar{x}$       | $\sigma$           | min(x)          | $\bar{x}$       | $\sigma$        | min(x)          | $\bar{x}$       | $\sigma$        | min(x)          |
| Method / coef. | $1 \times 10^1$ | $1 \times 10^{-1}$ | $1 \times 10^1$ |
| cho_dec        | 6.01            | 5.99               | 5.49            | 2.55            | 0.74            | 2.45            | 6.76            | 0.8             | 6.63            |
| sk_rrSVD_001   | <b>2.58</b>     | 3.66               | 2.21            | <b>1.02</b>     | 1.4             | 0.9             | <b>2.8</b>      | 0.92            | 2.69            |
| sk_rrSVD_002   | <b>3.37</b>     | 6.01               | 2.66            | <b>1.49</b>     | 2.59            | 1.13            | <b>3.37</b>     | 1.84            | 3.16            |
| sk_rrSVD_003   | <b>4.12</b>     | 7.87               | 3.24            | <b>1.7</b>      | 2.12            | 1.38            | <b>3.94</b>     | 1.83            | 3.75            |
| sk_rrSVD_004   | <b>4.65</b>     | 8.63               | 3.67            | <b>1.92</b>     | 1.74            | 1.61            | <b>4.65</b>     | 2.00            | 4.37            |
| sk_rrSVD_005   | <b>5.35</b>     | 9.5                | 4.16            | <b>2.13</b>     | 2.14            | 1.85            | <b>5.16</b>     | 1.87            | 4.93            |
| sk_rrSVD_006   | 6.15            | 11.17              | 4.79            | 2.42            | 2.51            | 2.08            | <b>5.69</b>     | 1.94            | 5.42            |
| sk_rrSVD_007   | <b>6.96</b>     | 12.09              | 5.32            | 2.55            | 2.23            | 2.33            | <b>6.21</b>     | 1.27            | 6.02            |
| sk_rrSVD_008   | <b>7.56</b>     | 12.58              | 6.06            | <b>2.74</b>     | 1.99            | 2.53            | <b>7.21</b>     | 1.91            | 6.91            |
| sk_rrSVD_009   | <b>8.21</b>     | 16.73              | 6.54            | <b>2.99</b>     | 2.33            | 2.76            | <b>8.1</b>      | 2.09            | 7.74            |
| sk_rrSVD_010   | <b>8.6</b>      | 14.9               | 7.09            | <b>3.19</b>     | 1.3             | 3.02            | <b>8.45</b>     | 1.33            | 8.2             |

**Table S41.** Process time (s) mean, standard deviation and best result for Au<sub>38</sub>Q  $K = 60$ . Bolded means  $\bar{x}$  differ statistically from *Cholesky decomposition*.

| Dataset        | AuN2-4k         |                    |                 | AuN2-8k         |                 |                 | AuN2-12k        |                 |                 |
|----------------|-----------------|--------------------|-----------------|-----------------|-----------------|-----------------|-----------------|-----------------|-----------------|
|                | $\bar{x}$       | $\sigma$           | min(x)          | $\bar{x}$       | $\sigma$        | min(x)          | $\bar{x}$       | $\sigma$        | min(x)          |
| Method / coef. | $1 \times 10^1$ | $1 \times 10^{-1}$ | $1 \times 10^1$ |
| cho_dec        | 7.95            | 5.44               | 7.29            | 3.34            | 0.85            | 3.23            | 10.79           | 11.17           | 9.22            |
| sk_rrSVD_001   | <b>3.27</b>     | 1.79               | 2.79            | <b>1.2</b>      | 1.03            | 1.09            | <b>3.7</b>      | 1.79            | 3.52            |
| sk_rrSVD_002   | <b>3.59</b>     | 5.4                | 3.23            | <b>1.64</b>     | 2.23            | 1.39            | <b>4.35</b>     | 1.98            | 4.13            |
| sk_rrSVD_003   | <b>4.62</b>     | 7.08               | 3.99            | <b>1.88</b>     | 2.1             | 1.63            | <b>5.03</b>     | 2.07            | 4.78            |
| sk_rrSVD_004   | <b>5.01</b>     | 8.86               | 4.4             | <b>2.1</b>      | 2.04            | 1.86            | <b>5.79</b>     | 1.88            | 5.5             |
| sk_rrSVD_005   | <b>5.76</b>     | 8.66               | 4.71            | <b>2.36</b>     | 2.17            | 2.12            | <b>6.41</b>     | 1.62            | 6.14            |
| sk_rrSVD_006   | <b>6.41</b>     | 9.51               | 5.51            | <b>2.62</b>     | 2.07            | 2.42            | <b>7.06</b>     | 2.02            | 6.74            |
| sk_rrSVD_007   | <b>7.25</b>     | 9.66               | 6.06            | <b>2.84</b>     | 1.5             | 2.7             | <b>7.81</b>     | 2.95            | 7.39            |
| sk_rrSVD_008   | <b>7.74</b>     | 9.3                | 6.64            | <b>3.06</b>     | 1.16            | 2.89            | <b>8.83</b>     | 2.63            | 8.3             |
| sk_rrSVD_009   | <b>8.34</b>     | 11.04              | 7.34            | 3.33            | 1.39            | 3.16            | <b>9.69</b>     | 2.78            | 9.17            |
| sk_rrSVD_010   | <b>8.87</b>     | 10.29              | 7.99            | <b>3.61</b>     | 1.44            | 3.46            | <b>10.25</b>    | 3.84            | 9.65            |
| Dataset        | AuN10-4k        |                    |                 | AuN10-8k        |                 |                 | AuN10-12k       |                 |                 |
|                | $\bar{x}$       | $\sigma$           | min(x)          | $\bar{x}$       | $\sigma$        | min(x)          | $\bar{x}$       | $\sigma$        | min(x)          |
| Method / coef. | $1 \times 10^1$ | $1 \times 10^{-1}$ | $1 \times 10^1$ |
| cho_dec        | 7.83            | 5.32               | 7.31            | 3.38            | 0.61            | 3.28            | 11.65           | 1.9             | 9.37            |
| sk_rrSVD_001   | <b>3.12</b>     | 3.21               | 2.72            | <b>1.19</b>     | 1.38            | 1.1             | <b>4.43</b>     | 0.89            | 3.54            |
| sk_rrSVD_002   | <b>3.38</b>     | 3.78               | 3.1             | <b>1.57</b>     | 1.62            | 1.42            | <b>4.62</b>     | 0.52            | 4.09            |
| sk_rrSVD_003   | <b>4.39</b>     | 5.54               | 3.8             | <b>1.81</b>     | 1.7             | 1.67            | <b>5.67</b>     | 0.82            | 4.75            |
| sk_rrSVD_004   | <b>4.87</b>     | 5.71               | 4.39            | <b>2.09</b>     | 1.92            | 1.87            | <b>6.51</b>     | 1.06            | 5.47            |
| sk_rrSVD_005   | <b>5.58</b>     | 6.94               | 4.9             | <b>2.33</b>     | 2.26            | 2.09            | <b>6.67</b>     | 0.57            | 6.15            |
| sk_rrSVD_006   | <b>6.42</b>     | 10.7               | 5.42            | <b>2.6</b>      | 2.01            | 2.41            | <b>8.03</b>     | 1.13            | 6.75            |
| sk_rrSVD_007   | <b>7.19</b>     | 10.25              | 5.98            | <b>2.87</b>     | 2.1             | 2.66            | <b>8.22</b>     | 0.72            | 7.42            |
| sk_rrSVD_008   | <b>7.41</b>     | 10.74              | 6.69            | <b>3.13</b>     | 1.44            | 2.96            | <b>10.15</b>    | 1.39            | 8.33            |
| sk_rrSVD_009   | 8.04            | 10.98              | 7.19            | <b>3.36</b>     | 1.67            | 3.18            | <b>10.65</b>    | 1.19            | 9.37            |
| sk_rrSVD_010   | <b>8.65</b>     | 11.43              | 7.82            | <b>3.62</b>     | 0.93            | 3.49            | 11.48           | 1.31            | 9.85            |
| Dataset        | AuN100-4k       |                    |                 | AuN100-8k       |                 |                 | AuN100-12k      |                 |                 |
|                | $\bar{x}$       | $\sigma$           | min(x)          | $\bar{x}$       | $\sigma$        | min(x)          | $\bar{x}$       | $\sigma$        | min(x)          |
| Method / coef. | $1 \times 10^1$ | $1 \times 10^1$    | $1 \times 10^1$ | $1 \times 10^1$ | $1 \times 10^1$ | $1 \times 10^1$ | $1 \times 10^1$ | $1 \times 10^1$ | $1 \times 10^1$ |
| cho_dec        | 8.43            | 0.93               | 7.61            | 3.36            | 0.67            | 3.27            | 9.47            | 1.91            | 9.25            |
| sk_rrSVD_001   | <b>3.58</b>     | 0.38               | 3.21            | <b>1.19</b>     | 1.01            | 1.11            | <b>3.66</b>     | 1.51            | 3.49            |
| sk_rrSVD_002   | <b>3.98</b>     | 0.46               | 3.37            | <b>1.68</b>     | 2.76            | 1.39            | <b>4.32</b>     | 2.26            | 4.07            |
| sk_rrSVD_003   | <b>5.44</b>     | 1.00               | 4.39            | <b>1.89</b>     | 2.31            | 1.64            | <b>4.9</b>      | 1.97            | 4.67            |
| sk_rrSVD_004   | <b>6.13</b>     | 1.17               | 4.57            | <b>2.14</b>     | 2.35            | 1.86            | <b>5.65</b>     | 1.81            | 5.39            |
| sk_rrSVD_005   | <b>6.83</b>     | 1.2                | 5.24            | <b>2.36</b>     | 2.45            | 2.1             | <b>6.15</b>     | 1.2             | 6.01            |
| sk_rrSVD_006   | <b>7.58</b>     | 0.87               | 5.92            | <b>2.64</b>     | 2.05            | 2.42            | <b>6.88</b>     | 2.1             | 6.62            |
| sk_rrSVD_007   | <b>8.89</b>     | 1.5                | 6.57            | <b>2.82</b>     | 1.78            | 2.59            | <b>7.5</b>      | 1.84            | 7.28            |
| sk_rrSVD_008   | <b>9.49</b>     | 1.62               | 7.19            | <b>3.06</b>     | 1.62            | 2.91            | <b>8.54</b>     | 2.16            | 8.2             |
| sk_rrSVD_009   | <b>10.07</b>    | 1.87               | 7.72            | <b>3.29</b>     | 1.27            | 3.13            | 9.38            | 1.87            | 9.04            |
| sk_rrSVD_010   | <b>10.36</b>    | 1.53               | 8.36            | <b>3.56</b>     | 1.24            | 3.4             | <b>9.87</b>     | 1.48            | 9.53            |



**Table S42.** Process time (s) mean, standard deviation and best result for Au<sub>38</sub>Q  $K = 70$ . Bolded means  $\bar{x}$  differ statistically from *Cholesky decomposition*.

| Dataset        | AuN2-4k           |                   |                   | AuN2-8k           |                   |                   | AuN2-12k          |                   |                   |
|----------------|-------------------|-------------------|-------------------|-------------------|-------------------|-------------------|-------------------|-------------------|-------------------|
|                | $\bar{x}$         | $\sigma$          | min(x)            | $\bar{x}$         | $\sigma$          | min(x)            | $\bar{x}$         | $\sigma$          | min(x)            |
| Method / coef. | 1x10 <sup>1</sup> |
| cho_dec        | 10.82             | 1.14              | 9.94              | 4.34              | 1.25              | 4.23              | 13.14             | 8.68              | 12.44             |
| sk_rrSVD_001   | <b>3.89</b>       | 0.52              | 3.5               | <b>1.48</b>       | 1.24              | 1.39              | <b>4.82</b>       | 3.09              | 4.48              |
| sk_rrSVD_002   | <b>4.56</b>       | 0.74              | 3.96              | <b>1.82</b>       | 1.53              | 1.69              | <b>5.48</b>       | 2.12              | 5.09              |
| sk_rrSVD_003   | <b>5.64</b>       | 0.8               | 4.69              | <b>2.1</b>        | 1.4               | 1.96              | <b>6.22</b>       | 2.8               | 5.78              |
| sk_rrSVD_004   | <b>6.57</b>       | 1.15              | 5.46              | <b>2.37</b>       | 1.4               | 2.24              | <b>6.96</b>       | 2.24              | 6.55              |
| sk_rrSVD_005   | <b>7.29</b>       | 1.25              | 5.95              | <b>2.68</b>       | 1.92              | 2.52              | <b>7.55</b>       | 2.09              | 7.25              |
| sk_rrSVD_006   | <b>8.07</b>       | 1.14              | 6.44              | <b>3.02</b>       | 1.94              | 2.83              | <b>8.34</b>       | 2.36              | 7.95              |
| sk_rrSVD_007   | <b>9.13</b>       | 1.63              | 7.07              | <b>3.28</b>       | 1.77              | 3.06              | <b>9.02</b>       | 2.74              | 8.67              |
| sk_rrSVD_008   | <b>9.59</b>       | 1.44              | 7.65              | <b>3.55</b>       | 1.81              | 3.36              | <b>10.26</b>      | 3.02              | 9.78              |
| sk_rrSVD_009   | <b>9.98</b>       | 1.65              | 8.42              | <b>3.82</b>       | 1.6               | 3.66              | <b>11.09</b>      | 3.5               | 10.58             |
| sk_rrSVD_010   | 10.8              | 1.82              | 9.03              | <b>4.12</b>       | 1.64              | 3.94              | <b>11.78</b>      | 5.73              | 11.3              |
| Dataset        | AuN10-4k          |                   |                   | AuN10-8k          |                   |                   | AuN10-12k         |                   |                   |
|                | $\bar{x}$         | $\sigma$          | min(x)            | $\bar{x}$         | $\sigma$          | min(x)            | $\bar{x}$         | $\sigma$          | min(x)            |
| Method / coef. | 1x10 <sup>1</sup> |
| cho_dec        | 10.37             | 0.67              | 9.57              | 4.77              | 5.2               | 4.26              | 14.24             | 1.49              | 12.39             |
| sk_rrSVD_001   | <b>3.88</b>       | 0.45              | 3.53              | <b>1.54</b>       | 1.48              | 1.36              | <b>5.2</b>        | 0.65              | 4.48              |
| sk_rrSVD_002   | <b>4.75</b>       | 1.05              | 4.04              | <b>1.89</b>       | 1.49              | 1.71              | <b>5.69</b>       | 0.34              | 5.06              |
| sk_rrSVD_003   | <b>5.85</b>       | 1.07              | 4.87              | <b>2.15</b>       | 1.8               | 1.97              | <b>7.21</b>       | 1.4               | 5.89              |
| sk_rrSVD_004   | <b>6.69</b>       | 1.3               | 5.33              | <b>2.41</b>       | 2.05              | 2.2               | <b>7.59</b>       | 1.22              | 6.53              |
| sk_rrSVD_005   | <b>7.15</b>       | 1.12              | 5.84              | <b>2.63</b>       | 1.37              | 2.51              | <b>8.2</b>        | 1.11              | 7.25              |
| sk_rrSVD_006   | <b>8.17</b>       | 1.45              | 6.49              | <b>2.96</b>       | 1.15              | 2.82              | <b>9.41</b>       | 1.47              | 7.94              |
| sk_rrSVD_007   | <b>8.68</b>       | 1.37              | 7.11              | <b>3.35</b>       | 1.72              | 3.13              | <b>10.04</b>      | 1.22              | 8.81              |
| sk_rrSVD_008   | <b>9.33</b>       | 1.57              | 7.85              | <b>3.62</b>       | 2.26              | 3.4               | <b>11.75</b>      | 1.76              | 9.72              |
| sk_rrSVD_009   | 10.19             | 1.96              | 8.42              | <b>3.88</b>       | 1.65              | 3.71              | <b>12.88</b>      | 1.8               | 10.7              |
| sk_rrSVD_010   | <b>10.35</b>      | 1.39              | 9.01              | <b>4.23</b>       | 1.44              | 4.03              | 13.73             | 1.99              | 11.41             |
| Dataset        | AuN100-4k         |                   |                   | AuN100-8k         |                   |                   | AuN100-12k        |                   |                   |
|                | $\bar{x}$         | $\sigma$          | min(x)            | $\bar{x}$         | $\sigma$          | min(x)            | $\bar{x}$         | $\sigma$          | min(x)            |
| Method / coef. | 1x10 <sup>1</sup> |
| cho_dec        | 11.28             | 1.2               | 9.91              | 4.59              | 4.9               | 4.24              | 14.18             | 1.73              | 12.2              |
| sk_rrSVD_001   | <b>4.19</b>       | 0.6               | 3.61              | <b>1.46</b>       | 0.73              | 1.38              | <b>4.92</b>       | 0.68              | 4.4               |
| sk_rrSVD_002   | <b>5.14</b>       | 0.86              | 4.14              | <b>1.84</b>       | 1.56              | 1.67              | <b>5.51</b>       | 0.47              | 5.02              |
| sk_rrSVD_003   | <b>6.93</b>       | 1.31              | 4.92              | <b>2.12</b>       | 1.47              | 1.94              | <b>6.56</b>       | 1.02              | 5.67              |
| sk_rrSVD_004   | <b>7.94</b>       | 1.34              | 5.56              | <b>2.38</b>       | 1.44              | 2.22              | <b>7.21</b>       | 0.96              | 6.35              |
| sk_rrSVD_005   | <b>8.63</b>       | 1.23              | 6.05              | <b>2.65</b>       | 1.82              | 2.49              | <b>7.66</b>       | 0.75              | 6.85              |
| sk_rrSVD_006   | <b>9.52</b>       | 1.37              | 6.61              | <b>2.97</b>       | 1.75              | 2.8               | <b>8.53</b>       | 0.8               | 7.83              |
| sk_rrSVD_007   | 10.68             | 1.68              | 7.3               | <b>3.35</b>       | 2.07              | 3.1               | <b>9.48</b>       | 1.04              | 8.48              |
| sk_rrSVD_008   | 11.22             | 1.82              | 8.04              | <b>3.57</b>       | 2.06              | 3.37              | <b>10.79</b>      | 1.27              | 9.63              |
| sk_rrSVD_009   | 11.71             | 2.04              | 8.72              | <b>3.79</b>       | 1.72              | 3.52              | <b>11.67</b>      | 1.07              | 10.41             |
| sk_rrSVD_010   | 11.75             | 1.92              | 9.4               | <b>4.12</b>       | 1.7               | 3.93              | <b>12.63</b>      | 1.56              | 11.12             |

**Table S43.** Process time (s) mean, standard deviation and best result for Au<sub>38</sub>Q  $K = 80$ . Bolded means  $\bar{x}$  differ statistically from *Cholesky decomposition*.

| Dataset        | AuN2-4k           |                   |                   | AuN2-8k           |                   |                   | AuN2-12k          |                   |                   |
|----------------|-------------------|-------------------|-------------------|-------------------|-------------------|-------------------|-------------------|-------------------|-------------------|
|                | $\bar{x}$         | $\sigma$          | min(x)            | $\bar{x}$         | $\sigma$          | min(x)            | $\bar{x}$         | $\sigma$          | min(x)            |
| Method / coef. | 1x10 <sup>1</sup> |
| cho_dec        | 13.32             | 0.8               | 12.55             | 5.72              | 2.28              | 5.54              | 16.84             | 5.41              | 16.11             |
| sk_rrSVD_001   | <b>4.38</b>       | 0.44              | 4.03              | <b>1.84</b>       | 0.88              | 1.73              | <b>5.75</b>       | 1.86              | 5.5               |
| sk_rrSVD_002   | <b>5.21</b>       | 0.98              | 4.53              | <b>2.23</b>       | 1.34              | 2.05              | <b>6.53</b>       | 1.65              | 6.25              |
| sk_rrSVD_003   | <b>6.66</b>       | 1.02              | 5.63              | <b>2.57</b>       | 1.47              | 2.37              | <b>7.24</b>       | 1.96              | 6.91              |
| sk_rrSVD_004   | <b>7.37</b>       | 1.14              | 6.23              | <b>2.83</b>       | 1.57              | 2.69              | <b>8.15</b>       | 2.24              | 7.84              |
| sk_rrSVD_005   | <b>8.23</b>       | 1.36              | 6.87              | <b>3.14</b>       | 1.6               | 2.99              | <b>8.87</b>       | 2.08              | 8.57              |
| sk_rrSVD_006   | <b>9.22</b>       | 1.49              | 7.41              | <b>3.51</b>       | 1.97              | 3.33              | <b>9.67</b>       | 2.57              | 9.26              |
| sk_rrSVD_007   | <b>9.85</b>       | 1.43              | 8.34              | <b>3.75</b>       | 1.59              | 3.61              | <b>10.4</b>       | 2.26              | 9.98              |
| sk_rrSVD_008   | <b>10.54</b>      | 1.64              | 8.81              | <b>4.02</b>       | 1.03              | 3.9               | <b>11.65</b>      | 2.35              | 11.19             |
| sk_rrSVD_009   | <b>11.04</b>      | 1.66              | 9.45              | <b>4.31</b>       | 0.91              | 4.17              | <b>12.58</b>      | 2.33              | 12.15             |
| sk_rrSVD_010   | <b>12.01</b>      | 2.02              | 9.98              | <b>4.71</b>       | 1.39              | 4.53              | <b>13.25</b>      | 2.17              | 12.85             |
| Dataset        | AuN10-4k          |                   |                   | AuN10-8k          |                   |                   | AuN10-12k         |                   |                   |
|                | $\bar{x}$         | $\sigma$          | min(x)            | $\bar{x}$         | $\sigma$          | min(x)            | $\bar{x}$         | $\sigma$          | min(x)            |
| Method / coef. | 1x10 <sup>1</sup> |
| cho_dec        | 13.31             | 0.83              | 12.68             | 5.93              | 5.85              | 5.49              | 17.1              | 10.55             | 15.85             |
| sk_rrSVD_001   | <b>4.31</b>       | 0.3               | 4.04              | <b>1.93</b>       | 2.17              | 1.72              | <b>5.66</b>       | 1.82              | 5.41              |
| sk_rrSVD_002   | <b>5.23</b>       | 0.91              | 4.61              | <b>2.31</b>       | 2.09              | 2.09              | <b>6.43</b>       | 2.29              | 6.09              |
| sk_rrSVD_003   | <b>6.85</b>       | 1.57              | 5.6               | <b>2.59</b>       | 1.93              | 2.38              | <b>7.18</b>       | 2.7               | 6.83              |
| sk_rrSVD_004   | <b>7.61</b>       | 1.42              | 6.11              | <b>2.83</b>       | 1.82              | 2.65              | <b>8.07</b>       | 2.51              | 7.7               |
| sk_rrSVD_005   | <b>8.3</b>        | 1.3               | 6.67              | <b>3.12</b>       | 1.73              | 2.91              | <b>8.76</b>       | 2.35              | 8.41              |
| sk_rrSVD_006   | <b>9.44</b>       | 1.69              | 7.36              | <b>3.41</b>       | 0.94              | 3.3               | <b>9.58</b>       | 3.18              | 9.07              |
| sk_rrSVD_007   | <b>10.14</b>      | 1.87              | 7.98              | <b>3.71</b>       | 1.15              | 3.57              | <b>10.3</b>       | 2.3               | 9.88              |
| sk_rrSVD_008   | <b>10.37</b>      | 1.67              | 8.71              | <b>4.06</b>       | 1.54              | 3.92              | <b>11.65</b>      | 4.51              | 11.02             |
| sk_rrSVD_009   | <b>10.69</b>      | 1.69              | 9.31              | <b>4.34</b>       | 1.35              | 4.18              | <b>12.49</b>      | 3.22              | 11.7              |
| sk_rrSVD_010   | <b>11.24</b>      | 1.72              | 9.97              | <b>4.73</b>       | 1.38              | 4.48              | <b>13.22</b>      | 5.07              | 12.61             |
| Dataset        | AuN100-4k         |                   |                   | AuN100-8k         |                   |                   | AuN100-12k        |                   |                   |
|                | $\bar{x}$         | $\sigma$          | min(x)            | $\bar{x}$         | $\sigma$          | min(x)            | $\bar{x}$         | $\sigma$          | min(x)            |
| Method / coef. | 1x10 <sup>1</sup> | 1x10 <sup>2</sup> | 1x10 <sup>1</sup> | 1x10 <sup>1</sup> |
| cho_dec        | 1.34              | 0.7               | 12.8              | 6.09              | 7.36              | 5.48              | 1.92              | 2.75              | 16.05             |
| sk_rrSVD_001   | <b>0.45</b>       | 0.38              | 4.15              | <b>1.86</b>       | 1.2               | 1.72              | <b>0.6</b>        | 0.56              | 5.45              |
| sk_rrSVD_002   | <b>0.61</b>       | 1.65              | 4.79              | <b>2.26</b>       | 1.63              | 2.05              | <b>0.68</b>       | 0.85              | 6.14              |
| sk_rrSVD_003   | <b>0.77</b>       | 1.59              | 5.72              | <b>2.64</b>       | 1.97              | 2.39              | <b>0.81</b>       | 1.32              | 6.94              |
| sk_rrSVD_004   | <b>0.84</b>       | 1.47              | 6.18              | <b>2.95</b>       | 2.28              | 2.62              | <b>0.89</b>       | 1.4               | 7.7               |
| sk_rrSVD_005   | <b>0.95</b>       | 1.73              | 6.71              | <b>3.22</b>       | 2.35              | 2.9               | <b>0.94</b>       | 1.17              | 8.47              |
| sk_rrSVD_006   | <b>1.02</b>       | 1.7               | 7.57              | <b>3.51</b>       | 2.25              | 3.24              | <b>1.07</b>       | 1.49              | 9.31              |
| sk_rrSVD_007   | <b>1.12</b>       | 1.67              | 8.41              | <b>3.74</b>       | 1.67              | 3.48              | <b>1.13</b>       | 1.5               | 10.01             |
| sk_rrSVD_008   | <b>1.21</b>       | 1.82              | 9.32              | <b>4.01</b>       | 1.73              | 3.83              | <b>1.35</b>       | 1.85              | 11.19             |
| sk_rrSVD_009   | <b>1.29</b>       | 2.14              | 10.06             | <b>4.35</b>       | 1.7               | 4.11              | <b>1.41</b>       | 1.69              | 12.29             |
| sk_rrSVD_010   | <b>1.26</b>       | 1.72              | 10.86             | <b>4.68</b>       | 1.63              | 4.45              | <b>1.53</b>       | 2.13              | 12.74             |

**Table S44.** Process time (s) mean, standard deviation and best result for Au<sub>38</sub>Q  $K = 90$ . Bolded means  $\bar{x}$  differ statistically from *Cholesky decomposition*.

| Dataset        | AuN2-4k           |                   |                   | AuN2-8k           |                   |                   | AuN2-12k          |                   |                   |
|----------------|-------------------|-------------------|-------------------|-------------------|-------------------|-------------------|-------------------|-------------------|-------------------|
|                | $\bar{x}$         | $\sigma$          | min(x)            | $\bar{x}$         | $\sigma$          | min(x)            | $\bar{x}$         | $\sigma$          | min(x)            |
| Method / coef. | 1x10 <sup>1</sup> | 1x10 <sup>2</sup> | 1x10 <sup>1</sup> | 1x10 <sup>2</sup> |
| cho_dec        | 15.73             | 0.41              | 15.18             | 6.9               | 3.12              | 6.55              | 2.14              | 8.02              | 2.05              |
| sk_rrSVD_001   | <b>4.89</b>       | 0.38              | 4.67              | <b>2.16</b>       | 1.93              | 1.96              | <b>0.7</b>        | 1.74              | 0.66              |
| sk_rrSVD_002   | <b>5.98</b>       | 1.06              | 5.24              | <b>2.53</b>       | 1.52              | 2.32              | <b>0.79</b>       | 2.36              | 0.75              |
| sk_rrSVD_003   | <b>7.4</b>        | 1.32              | 6.34              | <b>2.81</b>       | 1.53              | 2.62              | <b>0.87</b>       | 2.71              | 0.83              |
| sk_rrSVD_004   | <b>8.01</b>       | 0.79              | 7.18              | <b>3.16</b>       | 2.29              | 2.95              | <b>0.96</b>       | 2.8               | 0.9               |
| sk_rrSVD_005   | <b>8.85</b>       | 1.31              | 7.65              | <b>3.48</b>       | 2.06              | 3.26              | <b>1.03</b>       | 1.8               | 0.99              |
| sk_rrSVD_006   | <b>9.82</b>       | 1.55              | 8.21              | <b>3.95</b>       | 2.19              | 3.7               | <b>1.12</b>       | 2.23              | 1.07              |
| sk_rrSVD_007   | <b>10.1</b>       | 1.29              | 8.85              | <b>4.16</b>       | 1.46              | 3.98              | <b>1.2</b>        | 2.1               | 1.16              |
| sk_rrSVD_008   | <b>11.06</b>      | 1.65              | 9.58              | <b>4.5</b>        | 2.03              | 4.26              | <b>1.34</b>       | 3.35              | 1.28              |
| sk_rrSVD_009   | <b>11.78</b>      | 1.78              | 10.27             | <b>4.79</b>       | 1.83              | 4.53              | <b>1.44</b>       | 3.13              | 1.34              |
| sk_rrSVD_010   | <b>12.63</b>      | 2.27              | 10.95             | <b>5.02</b>       | 0.93              | 4.87              | <b>1.51</b>       | 1.95              | 1.46              |
| Dataset        | AuN10-4k          |                   |                   | AuN10-8k          |                   |                   | AuN10-12k         |                   |                   |
|                | $\bar{x}$         | $\sigma$          | min(x)            | $\bar{x}$         | $\sigma$          | min(x)            | $\bar{x}$         | $\sigma$          | min(x)            |
| Method / coef. | 1x10 <sup>1</sup> | 1x10 <sup>2</sup> | 1x10 <sup>1</sup> | 1x10 <sup>2</sup> |
| cho_dec        | 1.56              | 1.00              | 14.73             | 7.24              | 8.73              | 6.61              | 2.21              | 17.12             | 2.02              |
| sk_rrSVD_001   | <b>0.5</b>        | 0.72              | 4.56              | <b>2.17</b>       | 1.74              | 1.94              | <b>0.69</b>       | 1.93              | 0.66              |
| sk_rrSVD_002   | <b>0.6</b>        | 1.13              | 5.17              | <b>2.64</b>       | 2.34              | 2.35              | <b>0.78</b>       | 2.25              | 0.74              |
| sk_rrSVD_003   | <b>0.77</b>       | 1.69              | 6.3               | <b>2.88</b>       | 1.69              | 2.66              | <b>0.87</b>       | 4.44              | 0.82              |
| sk_rrSVD_004   | <b>0.86</b>       | 1.51              | 6.82              | <b>3.18</b>       | 1.65              | 2.99              | <b>0.94</b>       | 2.27              | 0.91              |
| sk_rrSVD_005   | <b>0.92</b>       | 1.62              | 7.36              | <b>3.5</b>        | 2.2               | 3.27              | <b>1.02</b>       | 2.45              | 0.97              |
| sk_rrSVD_006   | <b>1.05</b>       | 1.89              | 8.25              | <b>3.96</b>       | 2.2               | 3.67              | <b>1.11</b>       | 3.18              | 1.05              |
| sk_rrSVD_007   | <b>1.1</b>        | 1.94              | 8.98              | <b>4.23</b>       | 1.71              | 4.00              | <b>1.19</b>       | 2.89              | 1.15              |
| sk_rrSVD_008   | <b>1.17</b>       | 2.18              | 9.64              | <b>4.53</b>       | 1.78              | 4.31              | <b>1.32</b>       | 4.05              | 1.27              |
| sk_rrSVD_009   | <b>1.2</b>        | 1.74              | 10.37             | <b>4.86</b>       | 1.9               | 4.62              | <b>1.45</b>       | 6.13              | 1.37              |
| sk_rrSVD_010   | <b>1.29</b>       | 1.99              | 11.09             | <b>5.15</b>       | 1.3               | 4.97              | <b>1.52</b>       | 8.41              | 1.42              |
| Dataset        | AuN100-4k         |                   |                   | AuN100-8k         |                   |                   | AuN100-12k        |                   |                   |
|                | $\bar{x}$         | $\sigma$          | min(x)            | $\bar{x}$         | $\sigma$          | min(x)            | $\bar{x}$         | $\sigma$          | min(x)            |
| Method / coef. | 1x10 <sup>1</sup> | 1x10 <sup>2</sup> | 1x10 <sup>1</sup> | 1x10 <sup>2</sup> |
| cho_dec        | 1.59              | 0.72              | 15.2              | 7.45              | 10.6              | 6.54              | 2.59              | 4.12              | 2.04              |
| sk_rrSVD_001   | <b>0.5</b>        | 0.7               | 4.6               | <b>2.22</b>       | 2.26              | 1.96              | <b>0.75</b>       | 0.95              | 0.67              |
| sk_rrSVD_002   | <b>0.64</b>       | 1.39              | 5.23              | <b>2.63</b>       | 2.17              | 2.35              | <b>0.81</b>       | 0.58              | 0.73              |
| sk_rrSVD_003   | <b>0.82</b>       | 1.78              | 6.36              | <b>2.88</b>       | 1.62              | 2.63              | <b>0.96</b>       | 1.56              | 0.82              |
| sk_rrSVD_004   | <b>0.89</b>       | 1.72              | 6.92              | <b>3.16</b>       | 1.75              | 2.97              | <b>1.06</b>       | 1.59              | 0.92              |
| sk_rrSVD_005   | <b>1.03</b>       | 1.72              | 7.72              | <b>3.49</b>       | 2.05              | 3.26              | <b>1.1</b>        | 1.33              | 0.99              |
| sk_rrSVD_006   | <b>1.07</b>       | 1.47              | 8.46              | <b>3.97</b>       | 1.98              | 3.66              | <b>1.28</b>       | 2.17              | 1.06              |
| sk_rrSVD_007   | <b>1.2</b>        | 1.84              | 9.1               | <b>4.22</b>       | 2.02              | 3.98              | <b>1.31</b>       | 1.87              | 1.13              |
| sk_rrSVD_008   | <b>1.26</b>       | 1.77              | 9.79              | <b>4.44</b>       | 1.49              | 4.2               | <b>1.55</b>       | 2.23              | 1.28              |
| sk_rrSVD_009   | <b>1.36</b>       | 2.15              | 10.46             | <b>4.83</b>       | 1.63              | 4.61              | <b>1.67</b>       | 2.24              | 1.38              |
| sk_rrSVD_010   | <b>1.4</b>        | 1.83              | 11.17             | <b>5.14</b>       | 2.16              | 4.84              | <b>1.71</b>       | 2.68              | 1.45              |

**Table S45.** Process time (s) mean, standard deviation and best result for Au<sub>38Q</sub>  $K = 100$ . Bolded means  $\bar{x}$  differ statistically from *Cholesky decomposition*.

| Dataset        | AuN2-4k           |                   |                   | AuN2-8k           |                   |                   | AuN2-12k          |                   |                   |
|----------------|-------------------|-------------------|-------------------|-------------------|-------------------|-------------------|-------------------|-------------------|-------------------|
|                | $\bar{x}$         | $\sigma$          | min(x)            | $\bar{x}$         | $\sigma$          | min(x)            | $\bar{x}$         | $\sigma$          | min(x)            |
| Method / coef. | 1x10 <sup>1</sup> | 1x10 <sup>2</sup> | 1x10 <sup>1</sup> | 1x10 <sup>2</sup> |
| cho_dec        | 1.94              | 0.91              | 18.61             | 8.55              | 3.65              | 8.16              | 2.71              | 11.00             | 2.58              |
| sk_rrSVD_001   | <b>0.57</b>       | 0.52              | 5.28              | <b>2.57</b>       | 1.97              | 2.37              | <b>0.83</b>       | 1.53              | 0.8               |
| sk_rrSVD_002   | <b>0.67</b>       | 0.92              | 5.97              | <b>2.93</b>       | 1.28              | 2.81              | <b>0.91</b>       | 2.08              | 0.88              |
| sk_rrSVD_003   | <b>0.86</b>       | 1.48              | 7.4               | <b>3.32</b>       | 2.21              | 3.08              | <b>1.00</b>       | 2.37              | 0.97              |
| sk_rrSVD_004   | <b>0.94</b>       | 1.65              | 8.11              | <b>3.69</b>       | 1.94              | 3.51              | <b>1.1</b>        | 2.56              | 1.06              |
| sk_rrSVD_005   | <b>1.01</b>       | 1.73              | 8.62              | <b>3.94</b>       | 1.56              | 3.76              | <b>1.19</b>       | 1.99              | 1.14              |
| sk_rrSVD_006   | <b>1.09</b>       | 1.93              | 9.22              | <b>4.39</b>       | 1.78              | 4.21              | <b>1.28</b>       | 2.56              | 1.24              |
| sk_rrSVD_007   | <b>1.17</b>       | 1.85              | 9.94              | <b>4.64</b>       | 1.06              | 4.48              | <b>1.36</b>       | 1.99              | 1.33              |
| sk_rrSVD_008   | <b>1.29</b>       | 2.22              | 10.75             | <b>5.11</b>       | 1.85              | 4.82              | <b>1.51</b>       | 3.39              | 1.47              |
| sk_rrSVD_009   | <b>1.37</b>       | 2.22              | 11.57             | <b>5.4</b>        | 1.72              | 5.15              | <b>1.61</b>       | 2.39              | 1.56              |
| sk_rrSVD_010   | <b>1.4</b>        | 1.86              | 12.4              | <b>5.74</b>       | 1.82              | 5.47              | <b>1.69</b>       | 4.38              | 1.65              |
| Dataset        | AuN10-4k          |                   |                   | AuN10-8k          |                   |                   | AuN10-12k         |                   |                   |
|                | $\bar{x}$         | $\sigma$          | min(x)            | $\bar{x}$         | $\sigma$          | min(x)            | $\bar{x}$         | $\sigma$          | min(x)            |
| Method / coef. | 1x10 <sup>1</sup> | 1x10 <sup>2</sup> | 1x10 <sup>1</sup> | 1x10 <sup>2</sup> |
| cho_dec        | 1.89              | 0.6               | 17.95             | 8.73              | 6.14              | 8.13              | 2.85              | 24.1              | 2.55              |
| sk_rrSVD_001   | <b>0.53</b>       | 0.18              | 5.06              | <b>2.57</b>       | 2.03              | 2.37              | <b>0.82</b>       | 2.01              | 0.79              |
| sk_rrSVD_002   | <b>0.64</b>       | 0.86              | 5.8               | <b>2.99</b>       | 1.96              | 2.77              | <b>0.9</b>        | 3.3               | 0.86              |
| sk_rrSVD_003   | <b>0.83</b>       | 1.61              | 6.93              | <b>3.4</b>        | 2.32              | 3.17              | <b>1.01</b>       | 11.4              | 0.94              |
| sk_rrSVD_004   | <b>0.91</b>       | 1.34              | 7.64              | <b>3.71</b>       | 2.27              | 3.49              | <b>1.08</b>       | 3.91              | 1.04              |
| sk_rrSVD_005   | <b>1.03</b>       | 1.79              | 8.11              | <b>3.98</b>       | 2.26              | 3.75              | <b>1.18</b>       | 3.13              | 1.13              |
| sk_rrSVD_006   | <b>1.14</b>       | 1.8               | 9.12              | <b>4.46</b>       | 2.01              | 4.22              | <b>1.28</b>       | 5.59              | 1.23              |
| sk_rrSVD_007   | <b>1.19</b>       | 1.81              | 9.8               | <b>4.73</b>       | 1.52              | 4.53              | <b>1.35</b>       | 2.87              | 1.3               |
| sk_rrSVD_008   | <b>1.29</b>       | 1.96              | 10.56             | <b>5.2</b>        | 1.94              | 4.87              | <b>1.53</b>       | 8.67              | 1.45              |
| sk_rrSVD_009   | <b>1.38</b>       | 2.08              | 11.5              | <b>5.48</b>       | 1.76              | 5.24              | <b>1.63</b>       | 9.23              | 1.52              |
| sk_rrSVD_010   | <b>1.46</b>       | 2.32              | 12.21             | <b>5.73</b>       | 1.76              | 5.48              | <b>1.72</b>       | 10.91             | 1.62              |
| Dataset        | AuN100-4k         |                   |                   | AuN100-8k         |                   |                   | AuN100-12k        |                   |                   |
|                | $\bar{x}$         | $\sigma$          | min(x)            | $\bar{x}$         | $\sigma$          | min(x)            | $\bar{x}$         | $\sigma$          | min(x)            |
| Method / coef. | 1x10 <sup>1</sup> | 1x10 <sup>2</sup> | 1x10 <sup>1</sup> | 1x10 <sup>2</sup> |
| cho_dec        | 1.9               | 0.52              | 18.48             | 8.57              | 6.57              | 8.11              | 3.15              | 5.56              | 2.54              |
| sk_rrSVD_001   | <b>0.56</b>       | 0.45              | 5.23              | <b>2.56</b>       | 2.06              | 2.37              | <b>0.9</b>        | 1.5               | 0.79              |
| sk_rrSVD_002   | <b>0.76</b>       | 1.72              | 5.92              | <b>2.99</b>       | 1.71              | 2.78              | <b>1.00</b>       | 1.75              | 0.87              |
| sk_rrSVD_003   | <b>0.91</b>       | 1.64              | 7.03              | <b>3.36</b>       | 1.92              | 3.13              | <b>1.17</b>       | 2.57              | 0.94              |
| sk_rrSVD_004   | <b>1.05</b>       | 1.87              | 8.16              | <b>3.67</b>       | 2.19              | 3.42              | <b>1.25</b>       | 2.35              | 1.05              |
| sk_rrSVD_005   | <b>1.06</b>       | 1.39              | 8.58              | <b>3.97</b>       | 2.14              | 3.75              | <b>1.29</b>       | 1.86              | 1.13              |
| sk_rrSVD_006   | <b>1.2</b>        | 2.11              | 9.26              | <b>4.41</b>       | 2.06              | 4.2               | <b>1.51</b>       | 2.67              | 1.23              |
| sk_rrSVD_007   | <b>1.23</b>       | 1.78              | 10.12             | <b>4.7</b>        | 2.06              | 4.48              | <b>1.51</b>       | 2.4               | 1.3               |
| sk_rrSVD_008   | <b>1.37</b>       | 2.2               | 10.83             | <b>5.11</b>       | 1.84              | 4.79              | <b>1.78</b>       | 3.02              | 1.44              |
| sk_rrSVD_009   | <b>1.41</b>       | 1.88              | 11.77             | <b>5.42</b>       | 2.09              | 5.12              | <b>1.88</b>       | 2.55              | 1.58              |
| sk_rrSVD_010   | <b>1.5</b>        | 2.2               | 12.56             | <b>5.71</b>       | 2.3               | 5.43              | <b>1.91</b>       | 3.03              | 1.64              |
